# Supplementary material for: Volatilomics Analysis of Jasmine Tea during Multiple Rounds of Scenting Processes
Source: Foods. 2023 Feb 14;12(4):812. doi: 10.3390/foods12040812 (PMC9956320; doi:10.3390/foods12040812)
Supplement: Supplementary file 1 [file foods-12-00812-s001.zip › Supplementary Figures.pdf]

*Supplementary Figures*

# Volatilomics Analysis of Jasmine Tea During Multiple Rounds of Scenting Processes

Cheng Zhang<sup>1,2,†</sup>, Chengzhe Zhou<sup>1,2,3,†</sup>, Caiyun Tian<sup>1,2</sup>, Kai Xu<sup>1,2</sup>, Zhongxiong Lai<sup>1,3</sup>, Yuling Lin<sup>1,3</sup>, and Yuqiong Guo<sup>1,2,\*</sup>

1 College of Horticulture, Fujian Agriculture and Forestry University, Fuzhou 350002, China

2 Tea Industry Research Institute, Fujian Agriculture and Forestry University, Fuzhou 350002, China

3 Institute of Horticultural Biotechnology, Fujian Agriculture and Forestry University, Fuzhou 350002, China

\* Correspondence: guoyq828@163.com

† These authors contributed equally to this work.

**This PDF file includes:** Supplementary Figures S1–S8

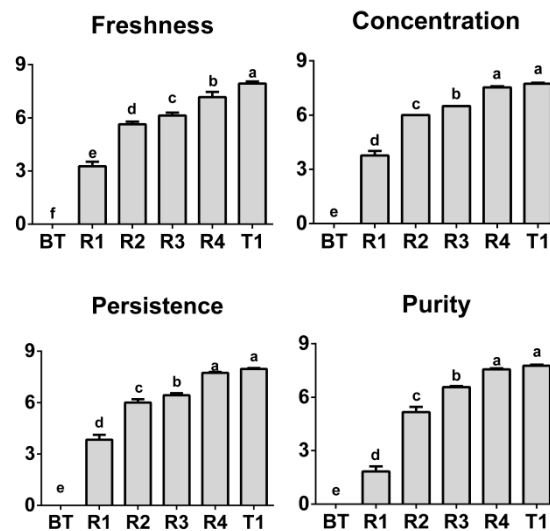

**Figure S1.** The significant difference analysis of taste attributes in base tea and jasmine tea with different rounds of scenting process. BT: base tea; R1: jasmine tea with one round of scenting process; R2: jasmine tea with two rounds of scenting processes; R3: jasmine tea with three rounds of scenting processes; R4: jasmine tea with four rounds of scenting processes; T1: jasmine tea with four rounds of scenting processes and Tihua process. The various small letters represent significant differences ( $p < 0.05$ ).

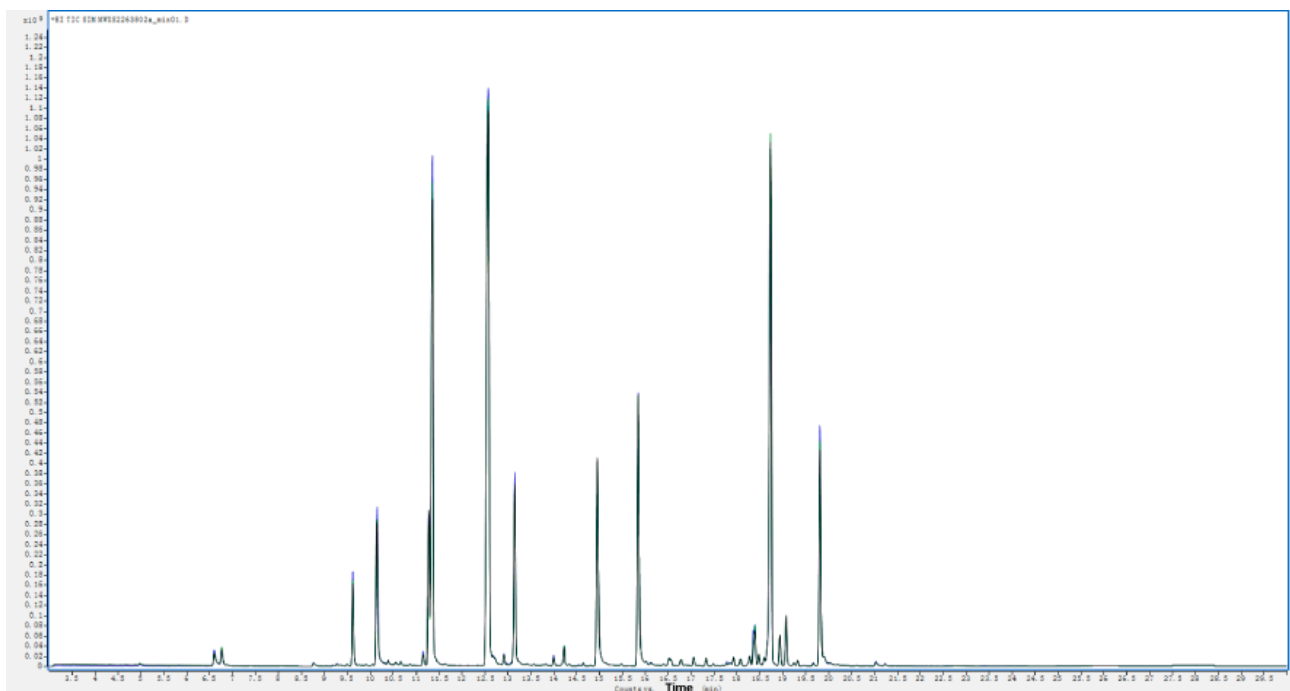

**Figure S2.** Total ion chromatogram of mass spectrometry analysis of the mixed sample for quality control.

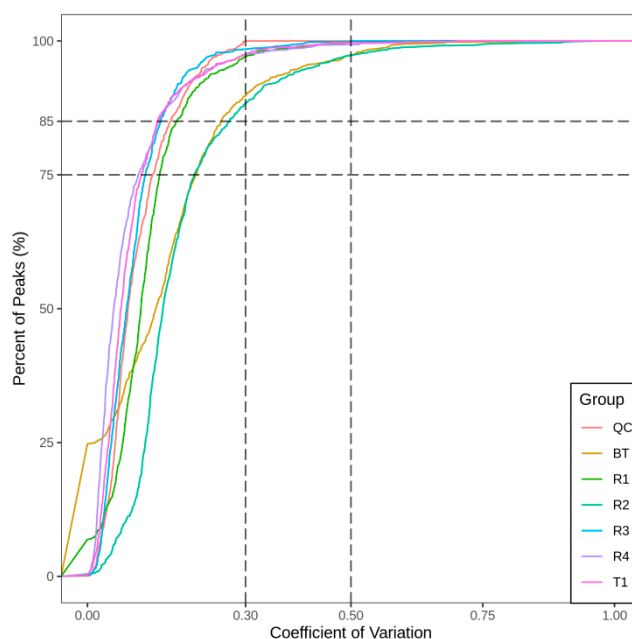

**Figure S3.** The Coefficient of Variation for all the groups. QC: quality control; BT: base tea; R1: jasmine tea with one round of scenting process; R2: jasmine tea with two rounds of scenting processes; R3: jasmine tea with three rounds of scenting processes; R4: jasmine tea with four rounds of scenting processes; T1: jasmine tea with four rounds of scenting processes and Tihua process.

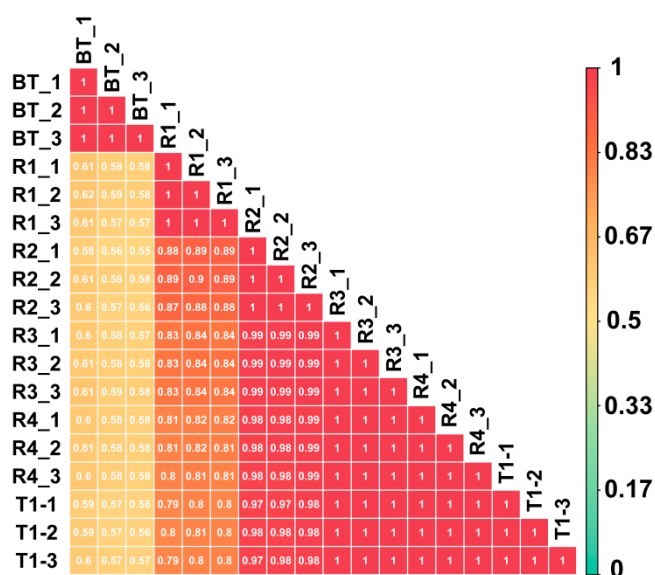

**Figure S4.** The correlation analysis using Pearson's Correlation Coefficient (PCC) between samples and groups. The numbers in rectangles represent PCCs. BT: base tea; R1: jasmine tea with one round of scenting process; R2: jasmine tea with two rounds of scenting processes; R3: jasmine tea with three rounds of scenting processes; R4: jasmine tea with four rounds of scenting processes; T1: jasmine tea with four rounds of scenting processes and Tihua process.

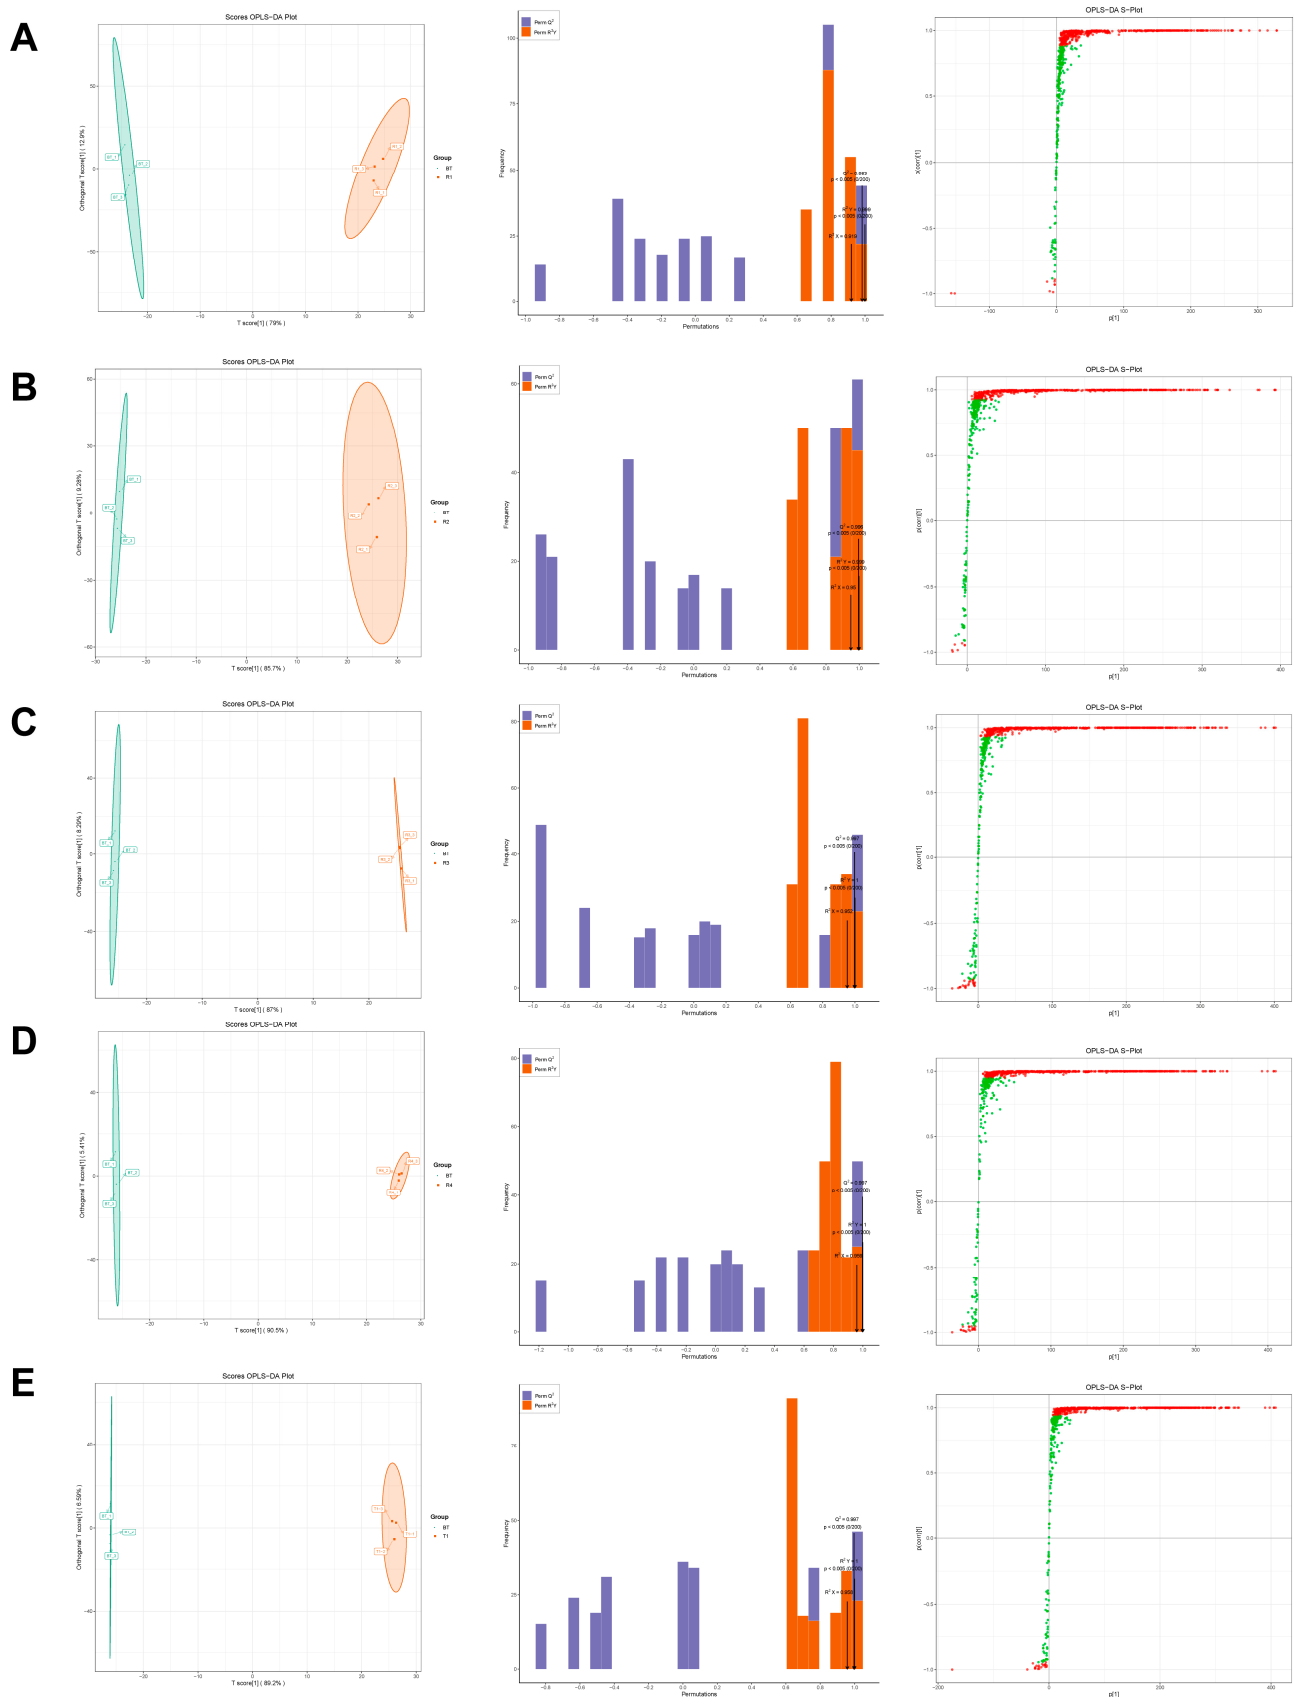

**Figure S5.** OPLS-DA score plots (left), permutation tests (middle), and S-plots of each pairwise comparison between the base tea and jasmine tea samples. The compared combinations were BT *vs.* R1 (A); BT *vs.* R2 (B); BT *vs.* R3 (C); BT *vs.* R4 (D); and BT *vs.* T1

(E). BT: base tea; R1: jasmine tea with one round of scenting process; R2: jasmine tea with two rounds of scenting processes; R3: jasmine tea with three rounds of scenting processes; R4: jasmine tea with four rounds of scenting processes; T1: jasmine tea with four rounds of scenting processes and Tihua process.

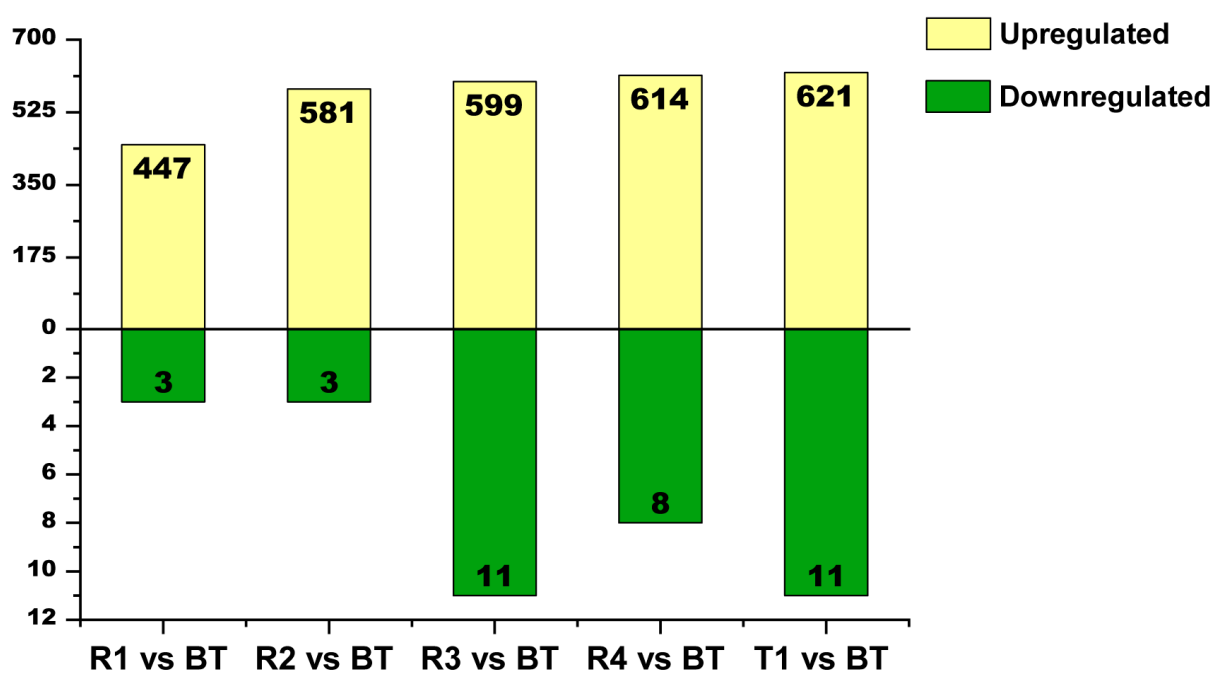

**Figure S6.** Number of differential metabolites of each pairwise comparison of base tea and jasmine tea samples. BT: base tea; R1: jasmine tea with one round of scenting process; R2: jasmine tea with two rounds of scenting processes; R3: jasmine tea with three rounds of scenting processes; R4: jasmine tea with four rounds of scenting processes; T1: jasmine tea with four rounds of scenting processes and Tihua process.

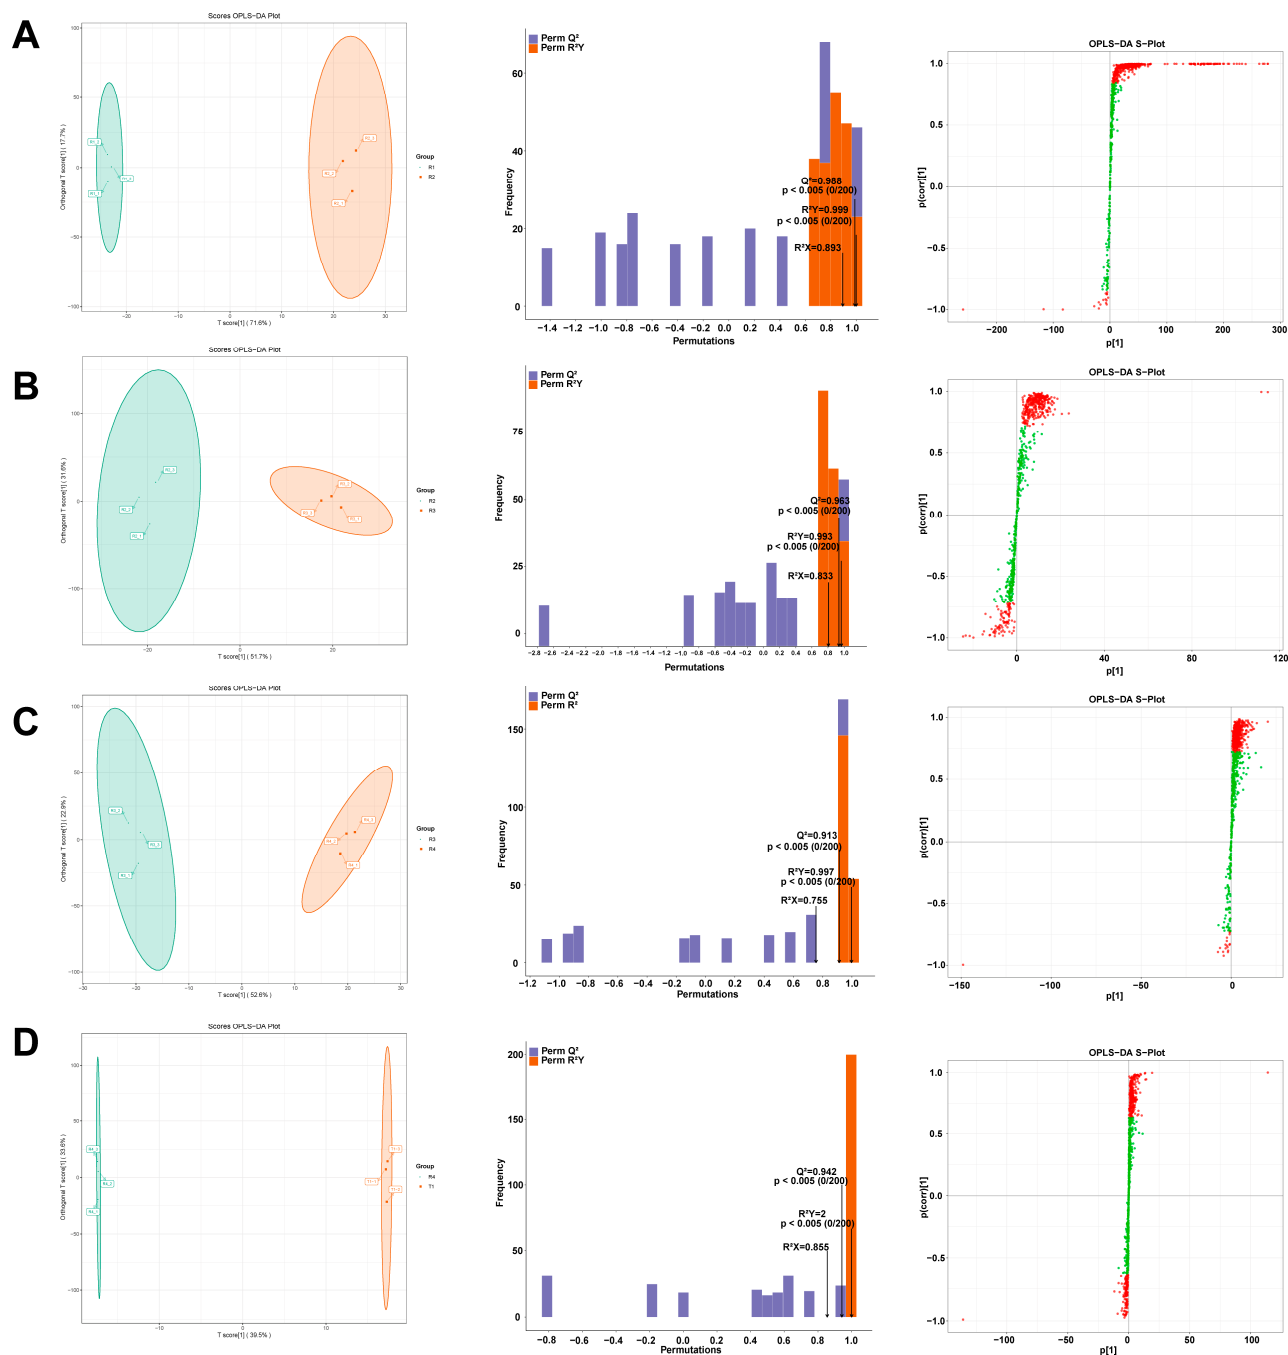

**Figure S7.** OPLS-DA score plots (left), permutation tests (middle), and S-plots of each pairwise comparison between the jasmine tea samples with different rounds of scenting processes. The compared combinations were R1 vs. R2 (A); R2 vs. R3 (B); R3 vs. R4 (C); and R4 vs. T1 (D). BT: base tea; R1: jasmine tea with one round of scenting process; R2: jasmine tea with two rounds of scenting processes; R3: jasmine tea with three rounds of scenting processes; R4: jasmine tea with four rounds of scenting processes; T1: jasmine tea with four rounds of scenting processes and Tihua process

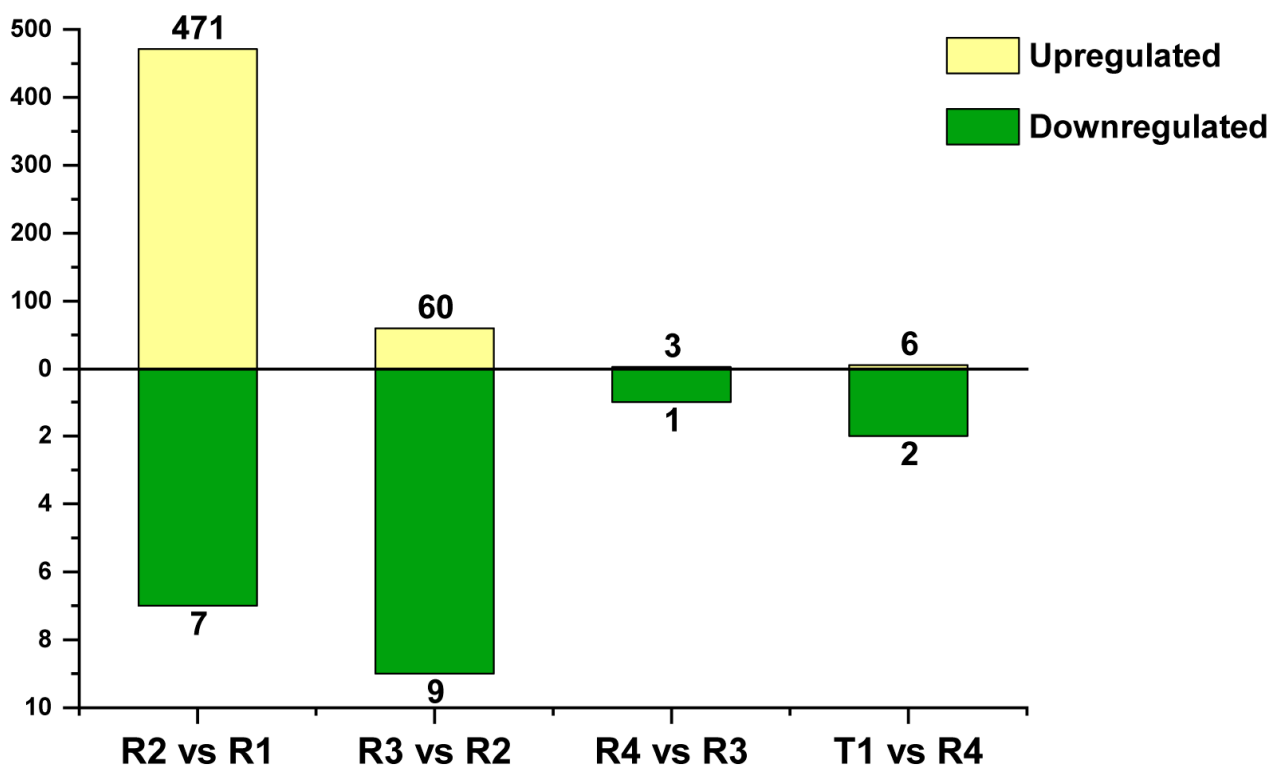

**Figure S8.** Number of differential metabolites of each pairwise comparison of jasmine tea during consecutive scenting. R1: jasmine tea with one round of scenting process; R2: jasmine tea with two rounds of scenting processes; R3: jasmine tea with three rounds of scenting processes; R4: jasmine tea with four rounds of scenting processes; T1: jasmine tea with four rounds of scenting processes and Tihua process.
