# Supplementary material for: Volatilomics Analysis of Jasmine Tea during Multiple Rounds of Scenting Processes
Source: Foods. 2023 Feb 14;12(4):812. doi: 10.3390/foods12040812 (PMC9956320; doi:10.3390/foods12040812)
Supplement: Supplementary file 1 [file foods-12-00812-s001.zip › Supplementary Tables.xlsx]

## Sheet: Table S1
Table S1. Volatile profiles of base tea and jasmine teas with different rounds of scenting processes
No.	Volatile compounds	CAS	Quantitative ion	Qualitative ion	Molecular weight (Da)	Formula	RI	Peak area
								BT_1	BT_2	BT_3	R1_1	R1_2	R1_3	R2_1	R2_2	R2_3	R3_1	R3_2	R3_3	R4_1	R4_2	R4_3	T1_1	T1_2	T1_3
	Ester
1	(Z)-Pent-2-enyl butyrate	42125-13-3	71	43	156.115	C9H16O2	1091	2.77593e+07	2.55423e+07	2.37249e+07	9.87439e+07	1.06873e+08	9.24286e+07	2.86975e+08	3.56788e+08	3.54881e+08	4.19986e+08	4.41331e+08	4.40137e+08	4.51581e+08	4.69158e+08	4.69158e+08	4.69221e+08	4.69221e+08	4.66174e+08
2	Benzyl acetate	140-11-4	108	91	150.068	C9H10O2	1162	21876455	18547984	17191249	497767575	518848862	490103793	832130828	923258196	895906294	889139825	923345592	900089015	879659536	890197755	890197755	880886956	880886956	884192822
3	Isobutyl tiglate	61692-84-0	83	101	156.115	C9H16O2	1093	9.49662e+06	9.072e+06	8.39963e+06	2.25547e+07	2.43686e+07	2.11502e+07	6.33471e+07	7.93522e+07	7.87148e+07	9.36165e+07	9.85941e+07	9.76491e+07	1.0105e+08	1.04918e+08	1.04918e+08	1.04646e+08	1.04646e+08	1.03496e+08
4	Ethyl sorbate	2396-84-1	95	67	140.084	C8H12O2	1094	6.33726e+06	6.11975e+06	5.87428e+06	8.78901e+06	9.17109e+06	8.27746e+06	1.79044e+07	2.2389e+07	2.1871e+07	2.49312e+07	2.63436e+07	2.61648e+07	2.67906e+07	2.78099e+07	2.78099e+07	2.73801e+07	2.73801e+07	2.695e+07
5	Methyl benzoate	93-58-3	105	77	136.052	C8H8O2	1094	6.11197e+06	5.53282e+06	5.41929e+06	2.38083e+07	2.48804e+07	2.02232e+07	3.32496e+08	3.87605e+08	3.79536e+08	3.64809e+08	3.84249e+08	3.73245e+08	4.21936e+08	4.23467e+08	4.23467e+08	4.2461e+08	4.2461e+08	4.39053e+08
6	Methyl salicylate	119-36-8	120	92	152.047	C8H8O3	1192	5.29756e+06	4.08893e+06	3.73037e+06	8.77641e+07	9.64917e+07	8.50697e+07	2.46463e+08	3.13765e+08	3.12599e+08	4.01081e+08	4.15718e+08	4.06487e+08	4.15649e+08	4.18316e+08	4.18316e+08	4.18306e+08	4.18306e+08	4.25659e+08
7	Isobutyl acetate	110-19-0	73	56	116.084	C6H12O2	772	3431763	3261916	3106085	2913640	2.75956e+06	2874179	2793244	2918068	2781066	2645600	2662440	2731218	2651885	2739175	2739175	2664874	2664874	2687293
8	3-Methylbutyl 3-methylbutanoate	659-70-1	70	85	172.146	C10H20O2	1104	2958497	2649669	2528426	6562304	7128286	6446045	18400304	22992970	22740404	26735773	28482350	28418065	29136547	30253526	30253526	30140389	30140389	29785134
9	Hexyl crotonate	19089-92-0	69	87	170.131	C10H18O2	1191	2.19578e+06	1.97931e+06	1.83906e+06	2.27275e+06	2.39597e+06	2.27401e+06	2.04834e+06	2.59225e+06	2.62667e+06	2.28966e+06	2.56453e+06	2.44996e+06	2.37297e+06	2.53462e+06	2.53462e+06	2.6006e+06	2.6006e+06	2.59789e+06
10	Isoamyl butyrate	106-27-4	71	43	158.131	C9H18O2	1056	1.9703e+06	1.55636e+06	1.52984e+06	1.90486e+06	2.52933e+06	2.37338e+06	2.52193e+06	2.63967e+06	2.83333e+06	2.07195e+06	2.45116e+06	2.66146e+06	3.07113e+06	3.01773e+06	3.01773e+06	2.87926e+06	2.87926e+06	2.93174e+06
11	Ethyl phenylacetate	101-97-3	91	65	164.084	C10H12O2	1247	1579112	1294581	1189535	1510169	1849260	1726694	2064585	2494728	2.6606e+06	1976448	2256259	2241565	2565794	2640263	2640263	2652359	2652359	2.4638e+06
12	1,5-Dimethyl-1-vinylhex-4-enyl valerate	10471-96-2	93	80	238.193	C15H26O2	1510	1.32724e+06	599476	376159	2.9313e+07	3.54638e+07	3.42203e+07	3.31178e+08	3.59802e+08	3.99784e+08	4.66979e+08	4.86517e+08	4.88345e+08	5.1804e+08	5.42613e+08	5.42613e+08	5.35424e+08	5.35424e+08	5.96783e+08
13	Methyl-2-butyl-iso-butyrate	2445-69-4	71	70	158.131	C9H18O2	1016	1.16076e+06	898485	891240	1.14156e+06	1.51393e+06	1.41422e+06	1.48272e+06	1.49519e+06	1.62094e+06	1.16271e+06	1.42027e+06	1.56807e+06	1.8239e+06	1.72847e+06	1.72847e+06	1.66836e+06	1.66836e+06	1.7297e+06
14	Octyl butyrate	110-39-4	71	89	200.178	C12H24O2	1393	1061902	826923	706541	1749220	2200337	2073772	1874398	2204900	2380836	1706876	1977003	1982454	2117415	2237815	2237815	2183136	2183136	2048893
15	N-Valeric acid cis-3-hexenyl ester	35852-46-1	82	67	184.146	C11H20O2	1237	1027799	948399	881676	813835	842165	836182	760308	957975	915529	775839	860269	742114	761322	794113	794113	795150	795150	789355
16	S-1-Methylpropyl 3-methylbutanethioate	2432-91-9	57	85	174.108	C9H18OS	1174	917467	749122	694130	851033	998201	946650	922654	1.07721e+06	1.19336e+06	841356	1.01057e+06	1.02201e+06	1.08536e+06	1.13103e+06	1.13103e+06	1.16333e+06	1.16333e+06	1.20358e+06
17	Heptan 2-yl butyrate	39026-94-3	71	41	186.162	C11H22O2	1218	735707	583410	558819	793354	972116	870740	869557	1.03385e+06	1.21092e+06	894381	1.08765e+06	1.07472e+06	1.12033e+06	1.19926e+06	1.19926e+06	1.18234e+06	1.18234e+06	1.19392e+06
18	Butyl hexanoate	626-82-4	56	99	172.146	C10H20O2	1192	581821	488649	441423	691095	848823	785775	715590	848288	896835	644857	743070	773216	833376	854300	854300	807287	807287	814270
19	Acetic acid--(4S)-3,3,6-trimethylhepta-1,5-dien-4-ol (1/1)	3465-88-1	85	127	196.146	C12H20O2	1173	501611	444601	349979	551812	614690	565166	566884	653296	710840	560286	646309	641695	672309	704294	704294	702206	702206	715972
20	Geranyl isobutyrate	2345-26-8	69	68	224.178	C14H24O2	1514	482515	248745	176856	1.00169e+07	1.21216e+07	1.16078e+07	1.12873e+08	1.22648e+08	1.37358e+08	1.61416e+08	1.70321e+08	1.69607e+08	1.82335e+08	1.91468e+08	1.91468e+08	1.89245e+08	1.89245e+08	2.12168e+08
21	Citronellyl isobutyrate	97-89-2	81	95	226.193	C14H26O2	1483	480569	317209	268588	418576	309508	346030	1.50039e+06	1.91162e+06	2.60358e+06	4.43337e+06	4.72022e+06	4.66146e+06	5.57272e+06	6.19004e+06	6.19004e+06	6.27572e+06	6.27572e+06	1.0167e+07
22	Dimethyl methylsuccinate	1604-11-1	59	129	160.074	C7H12O4	1059	463856	413939	358266	609593	662041	544544	548885	761795	880912	805474	882096	809459	800144	874498	874498	953530	953530	1.5261e+06
23	2-Propanol, 1-(dimethylamino)-, acetate (ester)	32188-28-6	58	43	145.11	C7H15NO2	869	431086	335898	301907	218822	193754	348146	385936	222675	281223	314641	228122	302528	392740	314654	314654	324348	324348	327136
24	(Z)-3-hexen-1-ol acetate	3681-71-8	82	67	142.099	C8H14O2	1005	404272	374281	354392	5.01789e+07	5.33595e+07	4.78768e+07	1.19189e+08	1.52192e+08	1.44372e+08	1.22917e+08	1.28195e+08	1.30698e+08	1.37677e+08	1.43056e+08	1.41408e+08	1.30372e+08	1.24544e+08	1.33084e+08
25	1-Methyloctyl butyrate	69727-42-0	71	41	214.193	C13H26O2	1417	320784	254881	230981	384756	475855	453292	465206	542058	560965	452863	525603	526065	541557	602208	602208	561467	561467	599016
26	(E)-2-Methylbut-2-en-1-yl methacrylate	88142-95-4	69	41	154.099	C9H14O2	1088	291316	255664	230773	610020	673387	533189	899741	1.20202e+06	1.26001e+06	1.52688e+06	1.64667e+06	1.52522e+06	1.54212e+06	1.67657e+06	1.67657e+06	1.74077e+06	1.74077e+06	1.72754e+06
27	2,6-Octadienoic acid, 3,7-dimethyl-, methyl ester	2349-14-6	69	41	182.131	C11H18O2	1323	223519	174782	165567	238862	308970	284800	312735	374351	446141	290804	319871	317231	362209	402687	402687	394128	394128	407475
28	Cyclopentyl hexanoate	5413-59-2	99	41	184.146	C11H20O2	1325	207129	166744	156085	225575	271174	261150	284224	332383	375870	244715	280435	289074	328906	341847	341847	327952	327952	331371
29	Geranyl formate	105-86-2	69	41	182.131	C11H18O2	1301	196240	155924	144518	218605	282973	263144	296517	357330	408587	264137	299593	315452	356081	357686	357686	355634	355634	362638
30	Butyl ethanoate	123-86-4	56	41	116.084	C6H12O2	816	183917	134094	117166	178886	161435	173896	200570	166807	201694	139552	147033	146584	165419	168686	168686	96706.2	96706.2	137778
31	Octyl acetate	112-14-1	112	70	172.146	C10H20O2	1210	182404	145042	134728	191744	232352	214883	219375	254317	265808	204290	239280	254598	268588	279993	279993	266460	266460	280025
32	1-Methylhexyl acetate	5921-82-4	98	87	158.131	C9H18O2	1043	175006	142476	139484	178709	235695	222801	234130	248531	266067	193925	239099	259788	296770	296751	296751	290315	290315	285160
33	Isopentyl hexanoate	2198-61-0	70	71	186.162	C11H22O2	1250	165470	140025	148614	193490	233565	216139	287434	362223	399366	358648	391613	390878	438429	475780	475780	474306	474306	487369
34	(E)-Hex-3-enyl butyrate	53398-84-8	67	82	170.131	C10H18O2	1185	163990	133967	122965	510929	642929	559721	14705015	20633483	20919797	14093155	16101615	16410644	16030812	17176372	17176372	16491705	16491705	16188678
35	cis-3-Hexenyl butyrate	16491-36-4	82	67	170.131	C10H18O2	1187	162784	133111	129117	503383	638105	559248	1.43739e+07	2.02596e+07	2.05314e+07	1.38632e+07	1.57197e+07	1.60361e+07	1.51267e+07	1.61482e+07	1.61482e+07	1.58128e+07	1.58128e+07	1.55669e+07
36	Methyl-2-butyl-caproate	2601-13-0	99	70	186.162	C11H22O2	1247	161305	125261	122365	238467	306592	260809	253946	305022	202504	174792	229409	199709	189769	179828	179828	174200	174200	169807
37	2-Chloroethyl methacrylate	1888-94-4	69	41	148.029	C6H9ClO2	977	151215	111950	112208	313926	359981	323575	809816	1074117	1067788	1009183	1136136	1061796	1053973	1212579	1212579	1265482	1265482	1264012
38	Pentyl octanoate	638-25-5	70	145	214.193	C13H26O2	1484	145362	114082	95653.5	157211	159663	166649	198819	231852	274450	236027	248618	244132	281484	295853	295853	300330	300330	365235
39	2-Ethylhexyl acrylate	103-11-7	55	70	184.146	C11H20O2	1220	144010	120978	110725	162399	191131	172474	166902	198883	236468	193543	221941	218344	232433	239105	239105	240782	240782	232467
40	Propyl caproate	626-77-7	117	99	158.131	C9H18O2	1097	127894	129734	132523	395048	405742	362975	1.04442e+06	1.25989e+06	1.15638e+06	1.46006e+06	1.43855e+06	1.40687e+06	1.55121e+06	1.55289e+06	1.55289e+06	1.48445e+06	1.48445e+06	1.38302e+06
41	1-Methylhexyl hexanoate	6624-58-4	99	117	214.193	C13H26O2	1417	115626	84831	70107	130415	151347	150100	144792	177010	192483	150757	170770	172134	181380	193559	193559	192601	192601	199302
42	2,6-Dimethylheptan-4-yl acetate	10250-45-0	129	69	186.162	C11H22O2	1092	114045	112427	112439	90612.5	89305.8	85518.9	119219	125158	128182	139543	157316	145891	152634	157566	157566	143385	143385	150167
43	1,5-Dimethyl-1-vinyl-4-hexenyl butyrate	78-36-4	93	41	224.178	C14H24O2	1418	110594	84045	68206	242914	296260	282535	883005	1085890	1256510	1798177	2085038	2143057	2261352	2405462	2405462	2373465	2373465	3409480
44	Dimethyl adipate	627-93-0	59	114	174.089	C8H14O4	1243	98811.3	83784.5	86943.9	79949.5	84883.1	80596.1	68609.3	88010.1	92411.1	75887	84920.9	79948.7	71210.7	76742.7	76742.7	75177.6	75177.6	78392.5
45	Butanoic acid, 5-hexenyl ester	108058-75-9	71	67	170.131	C10H18O2	1183	97367	79078	66780	301499	376538	336045	8988736	12602548	12732208	8507751	9640356	10081223	9507578	10176032	10176032	9940146	9940146	9868419
46	3-Mercapto-3-nethylbutyl formate (ester)	50746-10-6	69	41	148.056	C6H12O2S	1023	86993.9	64571.6	65530.1	69623.7	87074.2	83904.5	89575.2	118179	112001	80555.5	94574.9	98746.7	97505.1	102671	102671	115361	115361	135117
47	1-Octyl trifluoroacetate	2561-21-9	69	55	226.118	C10H17F3O2	1059	86134.1	69262.5	65738.7	74861.9	97053.7	95451	90566.7	91108.2	101272	76079.9	94124.5	102551	116725	111805	111805	100700	100700	105695
48	Amyl hexanoate	540-07-8	70	99	186.162	C11H22O2	1287	85677.7	70668.9	64126.1	89692.5	116942	115349	107824	129172	143298	97140.1	112519	117894	131808	135945	135945	134186	134186	131532
49	N-Decyl ethanoate	112-17-4	83	97	200.178	C12H24O2	1409	83193.8	60537.1	58230.8	84254.1	96833.5	95336.4	127032	145828	173039	148869	160034	149999	163967	158826	158826	179747	179747	176667
50	Benzoic ether	93-89-0	105	77	150.068	C9H10O2	1172	76414.7	56116.5	63237.3	1.4642e+06	1.51743e+06	1.21349e+06	7541731	9956448	9255791	1.15579e+07	12153115	11928698	15050779	15951161	15951161	15979274	15979274	18472849
51	5-Decanolide	705-86-2	99	71	170.131	C10H18O2	1497	73824	54933.9	53110	89035.4	112798	107482	108969	119996	132640	99343.7	113618	97351.9	104959	108690	108690	118561	118561	137962
52	Octyl formate	112-32-3	56	70	158.131	C9H18O2	1114	68238	50372.3	50580.5	80097.4	81893.3	69398	86979.4	88239.9	150214	111745	124706	128562	141898	138669	138669	235364	235364	306737
53	Butyl benzoate	136-60-7	105	123	178.099	C11H14O2	1377	67152.2	44384.2	35199.4	505021	599368	587219	2.17636e+06	2.55604e+06	2.79986e+06	3.49036e+06	4.15972e+06	4.14991e+06	5.04168e+06	5.2638e+06	5.2638e+06	5.01184e+06	5.01184e+06	5.85754e+06
54	Dehydromevalonic lactone	2381-87-5	82	39	112.052	C6H8O2	1169	65191.7	45846.5	53457.7	57453	55215	61581	66800	86807	82085	80061	93421	78990	86200	94927	94927	84017	84017	86426
55	Ethyl enanthate	106-30-9	88	43	158.131	C9H18O2	1098	60639	67406	59968	77583	87220	77085	124385	158905	156097	157798	174184	165297	166271	180415	180415	177477	177477	174454
56	1,3,5,7-Cyclooctatetraene	629-20-9	104	78	104.063	C8H8	850	55607.9	52524.7	56367.6	47955.4	68595.9	64962.1	51853.9	59449.4	56692.3	33785.1	39807.7	52254.2	46312.9	49424.5	49424.5	48502.9	48502.9	41526.1
57	Citronellyl butyrate	141-16-2	81	95	226.193	C14H26O2	1529	53392.7	44449.3	34160.6	655872	802714	771127	3.12218e+06	3.46099e+06	3.90981e+06	5.53308e+06	6.13076e+06	6.16225e+06	6.77541e+06	7.05619e+06	7.05619e+06	6.86567e+06	6.86567e+06	8.1081e+06
58	Ethyl mandelate	774-40-3	107	79	180.079	C10H12O3	1421	47377.9	38979.6	33217.6	113977	143795	134051	429982	523077	579257	887194	1.03826e+06	1.04615e+06	1.11871e+06	1.1937e+06	1.1937e+06	1.17301e+06	1.17301e+06	1.65714e+06
59	Cyclopentyl butyrate	6290-13-7	71	43	156.115	C9H16O2	1126	46934	28401	34419.5	55165	59207	60905	59630	67485	82699	107002	129389	140203	151773	136423	136423	149021	149021	122988
60	Acetic acid,(1R,5S,7R)-4,6,6-trimethylbicyclo[3.1.1]hept-3-en-7-ol	50764-55-1	119	134	194.131	C12H18O2	1239	44989	44270	42118	44453	43580	34067	46563	49709	50898	42721	51139	40052	45232	49795	49795	56380	56380	49606
61	4-Methylhexyl 3-methylbutanoate	1215127-80-2	70	57	200.178	C12H24O2	1312	44972	30970.1	28765.7	45902.8	58546.7	50833.5	63232.8	83085.6	81132.9	55085.1	61499.3	74665.3	93027.5	76429.2	76429.2	80384.3	80384.3	80265.2
62	Pentan-2-yl octanoate	55193-30-1	127	145	214.193	C13H26O2	1417	43221	37302	36680	52846	65753	65578	61635	76305	83599	71201	75493	74739	83428	86444	86444	87770	87770	86723
63	Isobutyl butyrate	539-90-2	71	56	144.115	C8H16O2	954	42806.6	35955.6	34358.5	51694.9	71556.4	58515.2	78608.9	75344.2	79651.2	50340	62848.5	62811.6	67864.2	72179.8	72179.8	73602.8	73602.8	80868.5
64	N-Caproic acid vinyl ester	3050-69-9	99	71	142.099	C8H14O2	974	40188.1	33244.7	36954.2	43558.8	50333.6	52843.6	60349.4	57121.1	62670.4	46035.1	53768.2	60723.9	68826.3	70653.7	70653.7	64455.9	64455.9	73635.7
65	2-Methoxyethyl acetate	110-49-6	58	43	118.063	C5H10O3	757	39776.7	48970.5	52778.8	41473.6	37189.5	35101.3	38766.3	36654.5	29627.4	25967.2	34960.1	35938.5	42188.9	54586.9	54586.9	34217.5	34217.5	23653.1
66	Benzyl formate	104-57-4	91	90	136.052	C8H8O2	1079	38315.1	28738.8	35347	86400	101207	89961	178233	246759	257555	321901	351848	304528	341182	377357	377357	383109	383109	392041
67	(Z)-3-Octen-1-ol acetate	69668-83-3	110	54	170.131	C10H18O2	1195	36060	30731	40217.2	40216	44553	39039.1	59691	80326	91514	101482	110659	103377	104878	109868	109868	117168	117168	105131
68	Methyl (Z)-4-decenoate	7367-83-1	74	41	184.146	C11H20O2	1323	34395.7	25599.8	37319.8	151047	57866.1	42789.1	40532.4	84167.5	56380.7	83368.3	35611.6	39251.7	38391.7	41722.6	41722.6	43151.1	43151.1	44793.5
69	Heptyl acetate	112-06-1	98	70	158.131	C9H18O2	1112	34304.2	30387	32337.2	37472	51407.8	41533.9	65509.9	52725.2	74043.9	78730	89203.7	94075	99776.1	106087	106087	115374	115374	103901
70	Pentyl acrylate	2998-23-4	55	70	142.099	C8H14O2	974	33117	34446	28565	29796	44854	34421	42283	42746	42770	27257	41253	41128	42023	42993	42993	44705	44705	39709
71	Butyl caprate	30673-36-0	56	41	228.209	C14H28O2	1590	32209	16524	12804	54427	51779	70585	65213	79888	86030	64644	71923	69530	66906	71109	71109	82547	82547	96417
72	Allyl isovalerate	2835-39-4	57	41	142.099	C8H14O2	915	30396.2	19968	24656.7	35505.2	41694	37958	48415	41769	50571.1	35370.9	40460.1	37400	42494.8	36716.8	36716.8	47649	47649	42178.6
73	Hexyl acetate	142-92-7	69	56	144.115	C8H16O2	1014	28952.5	21597.9	20656.9	16137.6	28079.1	24363	21092.6	19180.5	20045.2	15611.1	19490.6	26462.6	24461.9	22689.9	22689.9	19695.5	19695.5	19717.7
74	Linalyl formate	115-99-1	93	41	182.131	C11H18O2	1215	27727	22686	26102	65846.3	89042.7	64481.2	48834	52317	49109	46159	43894	41786.6	41836.3	46045	46045	57608	57608	42277
75	Acetoacetic acid isoamyl ester	2308-18-1	103	70	172.11	C9H16O3	1155	22470.5	25292	20626	24521	32157	22204	17868	28102	16526	13125.1	8649.24	5706.79	8959	6595	6595	7834	7834	4371
76	Prenyl caproate	76649-22-4	68	99	184.146	C11H20O2	1284	20373	14654	11316	70838	90269	85311	127059	164499	168080	131293	151062	141425	144331	150209	150209	147435	147435	154761
77	δ-Nonalactone	3301-94-8	99	42	156.115	C9H16O2	1396	19207.2	12647.9	13122.4	13770.8	20118.6	17750.3	21975.6	19404.6	25800.1	20276.2	20586.6	22317.6	26105.3	27059.1	27059.1	24075.5	24075.5	25374.1
78	Bornyl formate	7492-41-3	95	121	182.131	C11H18O2	1226	16721.8	10027.7	10474.7	8262.44	20777.2	13682.1	22283.1	39348.2	50049.8	41267.5	52056.1	44118.8	45943	49126.4	49126.4	57561.5	57561.5	64365.8
79	3,4-Methylenedioxybenzyl acetate	326-61-4	135	152	194.058	C10H10O4	1514	16254.4	14979	15115.7	222661	273939	267902	1.13674e+06	1.28748e+06	1.41997e+06	2.17246e+06	2.46028e+06	2.39697e+06	2.75004e+06	2.92361e+06	2.92361e+06	2.95888e+06	2.95888e+06	3.52698e+06
80	Geranyl isovalerate	109-20-6	69	41	238.193	C15H26O2	1606	16057	12713	10594	32528	49110	40504	59192	67143	79031	54748	61036	60803	59925	66180	66180	50339	50339	40650
81	2-Methyl-1-butyl acetate	624-41-9	70	55	130.099	C7H14O2	880	15544.4	18379	14993	19252	21740	15369	14150	14630	21407	14234	11084	19252.1	13802	16269	16269	11489	11489	25752.1
82	Hexalin acetate	622-45-7	82	67	142.099	C8H14O2	1043	13380.2	10084.1	13906	15218.6	19012	17588.2	35126.9	45981.7	36564.5	20152.9	20191.9	27229.2	24469.9	26932	26932	31188.3	31188.3	33213.7
83	Isobutyl hexanoate	105-79-3	99	56	172.146	C10H20O2	1149	12867	12180	11555	18576	20952	18340	16195	22087	25562	22645	24098	27482	30314	33461	33461	26756	26756	25350
84	Propan-2-yl benzoate	939-48-0	105	77	164.084	C10H12O2	1217	12519	13174	13667	25207	28657	28022	11363	23194	10720.1	5204.27	9374.5	11193.6	7895	14446.1	14446.1	13057	13057	12215.6
85	Butyl caprylate	589-75-3	56	57	200.178	C12H24O2	1389	11916.1	7762.45	8719.33	30776.1	45309.9	40194	36587.1	44781.9	50149.2	35063.1	41667.3	37394.6	29389.2	41435.3	41435.3	45390.4	45390.4	38454.6
86	N-Capric acid isobutyl ester	30673-38-2	56	57	228.209	C14H28O2	1546	10920	10809	7527	14499	19601	19331	13907	17810	20389	13907.8	17973	16472	15084	18774	18774	21374	21374	15888
87	(6,6-Dimethyl-2-bicyclo[3.1.1]hept-2-enyl)methyl 2-methylpropanoate	29021-37-2	91	119	222.162	C14H22O2	1466	10821.2	7136.2	11338.1	96264.7	115751	102691	675823	807761	993425	1.52883e+06	1.78192e+06	1.70379e+06	2.00533e+06	2.19172e+06	2.19172e+06	2.2638e+06	2.2638e+06	2.70299e+06
88	1-Octen-3-yl butyrate	16491-54-6	54	71	198.162	C12H22O2	1307	10643	8216	10202	12501	19618.2	15382	18939	25897.9	22896	24461	23843.1	20291	18170	30009	30009	24282	24282	18485
89	Hexyl butanoate	2639-63-6	89	71	172.146	C10H20O2	1192	10364	11006	10112.4	64018.2	61835	77666	127106	156990	136531	203114	165880	154976	182387	175980	175980	203802	203802	226930
90	Ethyl 4-ethoxybenzoate	23676-09-7	121	149	194.094	C11H14O3	1522	9755.64	7604.46	6784.83	122798	142838	131098	560823	618977	708531	982532	1.0986e+06	1.07361e+06	1.1915e+06	1.24552e+06	1.24552e+06	1.20233e+06	1.20233e+06	1.37302e+06
91	3-Methylheptyl acetate	72218-58-7	70	57	172.146	C10H20O2	1118	8868	6734	7069	13340	12950	17284	13900	12306	17578	23826	29935	32991	40297	39769	39769	36789	36789	31766
92	cis-3-Hexenyl salicylate	65405-77-8	121	120	220.11	C13H16O3	1670	8120.32	4771.38	3712.91	61808.9	56150.3	57424.2	381042	437543	866861	1.37071e+06	1.35064e+06	1.2491e+06	1.63192e+06	1.95954e+06	1.95954e+06	2.50367e+06	2.50367e+06	2.99978e+06
93	Ethyl hexahydrobenzoate	3289-28-9	83	55	156.115	C9H16O2	1136	7641	7377.71	6624	13111	16425	11603	35542	47237	43670	28917	31204	36602	33816	42255	42255	37718	37718	50712
94	Methylparaben	99-76-3	121	152	152.047	C8H8O3	1463	6674.77	5485.63	5429.74	20849.1	16180.3	20034.2	66972.7	73607.7	91321.7	127837	154307	146487	170811	174736	174736	182964	182964	227859
95	Amyl acetate	628-63-7	70	61	130.099	C7H14O2	910	5567.19	6881	5690	70584	84286	76743	87310	117444	105551	77886	87265	89422	72139	78089	78089	84226	84226	69140
96	Hexyl caproate	6378-65-0	117	99	200.178	C12H24O2	1384	5374.86	6215	4845	55003	81266	81599	283930	280796	309549	360936	389854	423371	494122	458710	458710	524195	524195	503852
97	3-Phenylpropyl isobutyrate	103-58-2	118	117	206.131	C13H18O2	1408	4663.33	1946.04	2416	13756.8	15513.8	15734	39469	39774.1	49965	53071	59288	56118	41548	57443	57443	51998	51998	50787
98	cis-6-Nonenyl acetate	76238-22-7	95	67	184.146	C11H20O2	1308	4327	6741	6734	7790	7928	11468	8962	10684	8607	4793	6838.78	7317	12656	10472.6	10472.6	14667	14667	14447
99	Acetic acid	103-09-3	70	43	172.146	C10H20O2	1129	4028.99	9791.76	4750.72	10836.9	11442.5	11494	12120.1	9855.17	14586.7	18412.1	30265.9	27168.4	29671.7	28612.4	28612.4	28264.3	28264.3	26134.5
100	Allyl 3-cyclohexylpropanoate	2705-87-5	95	55	196.146	C12H20O2	1435	4024.13	4240.19	3126.11	9778.31	15115.4	11892	49814.6	56430.1	69709.2	92034	106833	115855	125611	130554	130554	138761	138761	151693
101	N-Heptyl hexanoate	6976-72-3	117	99	214.193	C13H26O2	1482	3743.92	2051.79	3472.34	44007.8	52034.2	46593.1	287599	329497	376830	564713	643959	630284	718585	728014	728014	742656	742656	850120
102	Ethylcinnamate	103-36-6	131	103	176.084	C11H12O2	1464	3621.23	1155	1756	17735	21888	18295	116027	146434	186253	265290	303664	297367	318839	400359	400359	394606	394606	421958
103	δ-Dodecalactone	713-95-1	99	71	198.162	C12H22O2	1720	3422.98	2187.71	1344.72	2868.01	4111	3260.86	4652	5776	6527	3587.68	4890	7544	6064	3605.04	3605.04	5465.86	5465.86	4666
104	Methyl cinnamate	1754-62-7	131	103	162.068	C10H10O2	1379	3322.27	4010.39	4578.95	32929.8	42990	42437.5	128112	138826	149200	193956	226641	233436	274334	290992	290992	279145	279145	323468
105	Eugenol acetate	93-28-7	164	149	206.094	C12H14O3	1524	2857.63	2603.14	1555.03	7621.13	9564.66	11989.1	34007.7	37129.8	42475.6	52745.5	57564.9	64040.7	73534.4	69518	69518	72855.8	72855.8	86761.8
106	Benzyl 2-methylbutyrate	56423-40-6	91	192	192.115	C12H16O2	1392	2482.1	2673.07	3462.65	125541	121172	113677	661796	791428	949013	1.24387e+06	1.52336e+06	1.46741e+06	1.66972e+06	1.83372e+06	1.83372e+06	1.81016e+06	1.81016e+06	2.13699e+06
107	Benzyl valerate	10361-39-4	91	108	192.115	C12H16O2	1396	1563.58	1169.72	2308.86	15633.5	11950.4	14537.6	67073.1	113328	142301	169099	214658	198878	233382	269565	269565	270664	270664	303732
108	Methyl cyclohexanecarboxylate	4630-82-4	55	87	142.099	C8H14O2	1010	0	0	0	3.31349e+06	3.46896e+06	3.11272e+06	7.7204e+06	9.83285e+06	9.32666e+06	7.89384e+06	8.36323e+06	8.52008e+06	8.99679e+06	9.26778e+06	9.26778e+06	9.24927e+06	9.24927e+06	8.62752e+06
109	Amyl butyrate	540-18-1	89	71	158.131	C9H18O2	1077	0	0	0	21268	26250	25233.5	51767	74582	72795	86544	105134	106420	106235	117579	117579	116884	116884	124272
110	Methoxyethyl acrylate	3121-61-7	55	45	130.063	C6H10O3	851	0	0	0	3.21086e+06	3.53546e+06	2.58782e+06	8.72434e+06	1.15574e+07	1.08868e+07	9.11442e+06	9.68844e+06	9.58889e+06	9.52404e+06	9.79176e+06	9.79176e+06	9.7914e+06	9.7914e+06	9.27107e+06
111	Ethyl (methylthio)acetate	4455-13-4	61	134	134.04	C5H10O2S	989	0	0	0	407868	431509	382711	994254	1.27906e+06	1.2293e+06	1.03393e+06	1.06964e+06	1.11591e+06	1.16054e+06	1.21421e+06	1.21421e+06	1.21076e+06	1.21076e+06	1.14077e+06
112	Isopentyl acetate	123-92-2	70	55	130.099	C7H14O2	876	0	0	0	133903	138328	114245	183348	217293	205685	105877	114099	117878	87632.4	95288.6	95288.6	99276	99276	84639.9
113	Methyl enanthate	106-73-0	74	87	144.115	C8H16O2	1023	0	0	0	1.22706e+06	1.2424e+06	1.18236e+06	3.33568e+06	3.90979e+06	3.92972e+06	6.85736e+06	6.72838e+06	6.49095e+06	7.65924e+06	7.85662e+06	7.85662e+06	8.29818e+06	8.29818e+06	8.77099e+06
114	Methyl hexoate	106-70-7	74	87	130.099	C7H14O2	925	0	0	0	60676	60758	46149	11016	14274.6	17405	11425	7735	5171	7832	10036	10036	8907	8907	12413
115	Isobornyl formate	1200-67-5	95	93	182.131	C11H18O2	1233	0	0	0	4892.63	7409.96	5293.23	7094.71	16163	13704.1	16679.6	19529.4	18738.7	14270.1	18117.1	18117.1	19970.2	19970.2	27511.6
116	Allyl benzoate	583-04-0	105	77	162.068	C10H10O2	1254	0	0	0	480618	557615	503963	885272	1.11018e+06	1.1506e+06	737645	643801	604807	532140	603316	603316	591882	591882	549270
117	(1R,4S,6S)-1,3,3-Trimethyl-2-oxabicyclo[2.2.2]octan-6-yl acetate	57709-95-2	108	126	212.141	C12H20O3	1344	0	0	0	217703	275705	264512	3.0705e+06	3.56033e+06	3.95211e+06	4.35804e+06	4.6157e+06	4.30106e+06	4.6289e+06	4.98945e+06	4.98945e+06	4.94712e+06	4.94712e+06	5.2364e+06
118	cis-Carvyl acetate	7111-29-7	119	152	194.131	C12H18O2	1346	0	0	0	7.39982e+07	8.73707e+07	8.97619e+07	4.81362e+08	5.01218e+08	5.24784e+08	5.9064e+08	5.94638e+08	5.73325e+08	5.96954e+08	6.07696e+08	6.07696e+08	6.12455e+08	6.12455e+08	6.16351e+08
119	3,4-Dimethylbenzoic acid methyl ester	38404-42-1	133	164	164.084	C10H12O2	1355	0	0	0	55928.6	60671.8	68176.1	386303	474803	937232	1.31533e+06	1.2842e+06	1.10072e+06	1.31528e+06	1.60371e+06	1.60371e+06	1.93871e+06	1.93871e+06	2.05767e+06
120	Hexyl 2-furoate	39251-86-0	95	113	196.11	C11H16O3	1436	0	0	0	1329.49	3041.76	1346.46	11344.8	12187.3	13098.6	17536.3	21081.4	18454.1	24889.5	24303.5	24303.5	26199.3	26199.3	28691.1
121	Ethyl salicylate	118-61-6	120	92	166.063	C9H10O3	1270	0	0	0	482990	647495	528302	1.18095e+06	1.71321e+06	2.22086e+06	3.71501e+06	4.01996e+06	3.67384e+06	3.82188e+06	4.37883e+06	4.37883e+06	4.88047e+06	4.88047e+06	5.15876e+06
122	Cinnamyl isobutyrate	103-59-3	117	71	204.115	C13H16O2	1586	0	0	0	0	0	0	149683	157170	234642	246844	266379	257959	289177	308523	308523	332706	332706	378124
123	Ethyl trans-4-decenoate	76649-16-6	88	110	198.162	C12H22O2	1347	0	0	0	76856.5	88762.5	95567	638144	680638	795663	1.03633e+06	1.03044e+06	964047	1.06212e+06	1.13324e+06	1.13324e+06	1.16905e+06	1.16905e+06	1.18936e+06
124	2-Propenoic acid, 2-methyl-, 3,3,5-trimethylcyclohexyl ester	7779-31-9	109	69	210.162	C13H22O2	1353	0	0	0	11839.9	11517.5	10300.1	20262.5	20745.3	21153.5	23669.9	29206.3	33344.4	31106.4	31491.7	31491.7	25940.7	25940.7	25302.7
125	Iso-3-thujyl acetate	62181-90-2	93	43	196.146	C12H20O2	1298	0	0	0	24378	40401.7	26007	126537	174377	181176	205702	222489	217982	218481	232842	232842	250608	250608	234386
126	Hexanoic acid, 5-hexenyl ester	108058-81-7	67	82	198.162	C12H22O2	1371	0	0	0	0	0	0	721383	982277	1125014	943043	1.10247e+06	1.03784e+06	1.07519e+06	1.30138e+06	1.30138e+06	1.35766e+06	1.35766e+06	1379665
127	E-2-Hexenyl benzoate	76841-70-8	105	77	204.115	C13H16O2	1588	0	0	0	0	0	0	8.28139e+06	8.04806e+06	1.02313e+07	1.56317e+07	1.7168e+07	1.64491e+07	1.32896e+07	1.41912e+07	1.41912e+07	1.53263e+07	1.53263e+07	1.59943e+07
128	Lavandulyl caproate	59550-36-6	93	69	252.209	C16H28O2	1650	0	0	0	69142	60916	64939.4	348412	383794	686585	861988	936445	857903	1160067	1250073	1250073	1354893	1354893	1523684
129	Methyl 2-(methylamino)benzoate	85-91-6	165	105	165.079	C9H11NO2	1408	0	0	0	2.73202e+06	3.33524e+06	3.44325e+06	1.38625e+07	1.61014e+07	1.92193e+07	2.24176e+07	2.35462e+07	2.07827e+07	2.17578e+07	2.37474e+07	2.37474e+07	2.49036e+07	2.49036e+07	2.50143e+07
130	Geranyl butyrate	106-29-6	69	71	224.178	C14H24O2	1562	0	0	0	0	0	0	207786	259243	480462	594707	602689	539254	874145	1.03279e+06	1.03279e+06	1.24355e+06	1.24355e+06	1.61303e+06
131	(S)-4-(1-Acetoxyallyl)phenyl acetate	52946-22-2	132	150	234.089	C13H14O4	1650	0	0	0	0	0	0	33746	39509	66742	79198	81229	72996	110051	108537	108537	115849	115849	132754
132	Methyl laurate	111-82-0	74	87	214.193	C13H26O2	1526	0	0	0	3179	4528	4025.01	11391	14108.4	14316.6	19372.1	19077.6	16626	21675.6	24883	24883	21377	21377	22887
133	cis-3-Hexenyl hexanoate	31501-11-8	82	67	198.162	C12H22O2	1386	0	0	0	72442.3	98023.3	85498.4	8.21425e+06	1.0554e+07	1.21386e+07	1.01211e+07	1.14802e+07	1.1147e+07	1.18539e+07	1.27844e+07	1.26742e+07	1.36114e+07	1.20247e+07	1.36044e+07
134	Acetic acid, (4,6,8,9-tetramethyl-3-oxabicyclo[3.3.1]mon-6-en-1-yl)methyl ester	309722-81-4	133	119	252.173	C15H24O3	1667	0	0	0	23013	21635	23128.5	149984	167596	230583	396729	393474	363335	447700	479855	479855	461337	461337	461432
135	Ethylcinnamate	4192-77-2	131	103	176.084	C11H12O2	1463	0	0	0	26005.1	29721.5	29742.1	146115	162793	215118	297649	342366	344398	389468	434349	434349	426998	426998	512201
136	Benzyl tiglate	37526-88-8	91	83	190.099	C12H14O2	1498	0	0	0	91502	116690	117175	1614347	1857306	2849942	3610887	3904226	3673938	4345562	4871140	4871140	5100885	5100885	5565870
137	4-Methyl-2-nitrophenyl acetate	54646-55-8	153	77	195.053	C9H9NO4	1569	0	0	0	0	0	0	12286	12331	18225	24578	24611	19455	28939	39460	39460	40376	40376	43987
138	Isobutyl phenylacetate	102-13-6	91	136	192.115	C12H16O2	1393	0	0	0	100259	138205	121773	652951	806044	969111	1336473	1551052	1493946	1698944	1865633	1865633	1842904	1842904	2170763
139	Cyclohexanol, 1-methyl-4-(1-methylethylidene)-, acetate	10235-63-9	136	121	196.146	C12H20O2	1341	0	0	0	100598	105022	104633	794736	885520	984171	1.29539e+06	1.31064e+06	1.1776e+06	1.33769e+06	1.42769e+06	1.42769e+06	1.44553e+06	1.44553e+06	1.46926e+06
140	cis-3-Hexenyl cis-3-hexenoate	61444-38-0	82	67	196.146	C12H20O2	1389	0	0	0	69283	57373	74638	8186154	10445198	11965622	10057942	11420127	11120212	11831347	12650680	12650680	12580834	12580834	13451774
141	(+)-cis-Verbenol, acetate	29135-27-1	119	109	194.131	C12H18O2	1279	0	0	0	313551	347529	342468	305587	424613	488384	424701	480013	414155	409587	461605	461605	484808	484808	446995
142	Ethyl pelargonate	123-29-5	88	101	186.162	C11H22O2	1295	0	0	0	479593	531136	545918	7476228	8344819	9050293	14428035	14957875	13723235	16016548	16544722	16544722	17087010	17087010	17507790
143	Benzyl isobutyrate	103-28-6	91	108	178.099	C11H14O2	1299	0	0	0	1336737	1512027	1561033	16963928	18793929	20274467	31151831	32683007	29803243	34809142	35530600	35530600	36478398	36478398	37593269
144	Octyl isobutyrate	109-15-9	89	71	200.178	C12H24O2	1344	0	0	0	303207	305997	348412	1.97913e+06	2.14014e+06	2.43196e+06	3.08151e+06	3.10562e+06	2.90968e+06	3.16118e+06	3.4728e+06	3.4728e+06	3.59767e+06	3.59767e+06	3.72037e+06
145	Triacetin	102-76-1	145	103	218.079	C9H14O6	1344	0	0	0	4347.78	4648.63	4282.65	25930.7	25786.2	36578.2	34551.7	40132.9	40482.7	40186.4	35829.9	35829.9	41264.8	41264.8	38787.3
146	Ethyl cyclohexanepropionate	10094-36-7	101	88	184.146	C11H20O2	1345	0	0	0	2716	3168.81	2343	26425	24839	25029	40867	41715	37035	42017	43716	43716	46178	46178	44846
147	Ethyl geranate	32659-21-5	69	128	196.146	C12H20O2	1351	0	0	0	33273.5	32659.5	36632.3	72815	86264.1	74248.6	85465.7	101891	109371	110383	134740	134740	96092.2	96092.2	83332.8
148	β-Phenylethyl butyrate	103-52-6	104	105	192.115	C12H16O2	1444	0	0	0	2568	2534.98	4141.6	9	9	9	7910.52	4988.04	6108.52	7322.19	7870.83	7870.83	11587.9	11587.9	17174.7
149	Dimethyl octanedioate	1732-09-8	129	138	202.121	C10H18O4	1448	0	0	0	7476	6423	7443	31689	40843	38110	57818	65779	63573	76426	77032	77032	72945	72945	83864
150	Dimethyl (2S)-2-acetamidobutanedioate	57289-64-2	102	144	203.079	C8H13NO5	1452	0	0	0	2461.96	1806.25	2266.42	7506.1	8860.71	9892.62	13343	13954.1	16516.3	10735.7	10020	10020	13809.8	13809.8	13311.6
151	Dimethyl phthalate	131-11-3	163	77	194.058	C10H10O4	1454	0	0	0	1221.37	2393.22	1850.76	29889.8	43575.1	85946.4	77069.2	78569.8	70233.2	121444	119212	119212	148076	148076	134563
152	Neryl isobutyrate	2345-24-6	69	93	224.178	C14H24O2	1475	0	0	0	35125.3	36416	36004.7	187400	219580	256493	379863	446490	433893	492030	542503	542503	521417	521417	613609
153	2-Phenoxyethyl isobutyrate	103-60-6	115	71	208.11	C12H16O3	1488	0	0	0	19598	33051	33085	109454	115175	118379	127450	150775	139693	146881	143826	143826	140907	140907	141821
154	cis-2-Benzofurancarboxylic acid, 2,4,5,6,7,7A-hexahydro-4,4,7A-trimethyl-, methyl ester	77383-92-7	165	95	224.141	C13H20O3	1517	0	0	0	4913.26	3635.53	3538.41	12648.6	10201.6	17788	23766.8	25844.9	21730.2	29390.7	27399.7	27399.7	44664.8	44664.8	48452.4
155	Hexyl benzoate	6789-88-4	105	123	206.131	C13H18O2	1580	0	0	0	0	0	0	9.14796e+06	9.73248e+06	7.63484e+06	1.33244e+07	1.4361e+07	1.34181e+07	1.2244e+07	1.2699e+07	1.2699e+07	1.21639e+07	1.21639e+07	1.23053e+07
156	2,2,4-Trimethyl-1,3-pentanediol diisobutyrate	6846-50-0	71	159	286.214	C16H30O4	1588	0	0	0	11508	8473.15	10786	23403	26000	30368	21543	22344	22129	27409	23603	23603	19604	19604	15630.7
157	Citronellyl valerate	7540-53-6	81	123	240.209	C15H28O2	1625	0	0	0	0	0	0	47274	48930	87830	90625	95924	104741	131727	136314	136314	120781	120781	122163
158	Geranyl valerate	10402-47-8	69	68	238.193	C15H26O2	1659	0	0	0	15463.5	10226.3	14057.5	78226.9	98263.3	149807	217263	211679	207303	265566	293478	293478	331711	331711	392303
159	Methyl dihydrojasmonate	24851-98-7	83	82	226.157	C13H22O3	1656	0	0	0	16186.6	9461.66	16100.6	20479.7	34381	50614	79652.8	37984.5	45116.8	9	9	9	9	9	9
160	2-Phenylethyl hexanoate	6290-37-5	104	105	220.146	C14H20O2	1650	0	0	0	7648.55	7926.01	6367	26810	36391	55332	75988	73940	76255	96868	114339	114339	92556	92556	109465
161	Isobutyl adipate	141-04-8	129	57	258.183	C14H26O4	1695	0	0	0	0	0	0	6833.79	8387	16972	9439	17696	12879	21816	23086	23086	19754	19754	32897
162	Methyl vanillate	3943-74-6	151	182	182.058	C9H10O4	1525	0	0	0	6801	11644	11979.1	31895	28762.6	51418.2	59699.8	57372	62322	61712	70301	70301	75549.1	75549.1	79615
163	Benzyl benzoate	120-51-4	105	91	212.084	C14H12O2	1763	0	0	0	0	0	0	640346	921581	3275248	5243421	4354591	4969703	4690625	8801672	8801672	14286569	14286569	2105963
164	Methyl anthranilate	134-20-3	119	92	151.063	C8H9NO2	1343	0	0	0	73998220	87370672	89761884	475279558	501218273	530320431	590639658	595623056	580824474	609497270	615428571	615428571	607320268	607320268	611826736
165	3-Hexen-1-ol benzoate	25152-85-6	82	105	204.115	C13H16O2	1570	0	0	0	5273234	5996289	6383432	185033131	198585028	242191762	342448853	361423270	341381671	397122354	421554385	421554385	430802096	430802096	436069718
	Heterocyclic compound
166	3-Isobutyl-2-methoxypyrazine	24683-00-9	124	94	166.111	C9H14N2O	1181	2.99997e+07	2.81337e+07	2.62883e+07	2.60974e+07	2.61056e+07	2.58042e+07	2.00582e+07	2.55972e+07	2.58861e+07	2.07456e+07	2.34199e+07	2.16192e+07	2.03206e+07	2.18994e+07	2.18994e+07	2.2639e+07	2.2639e+07	2.29801e+07
167	2-Acetyl-3,5-dimethylpyrazine	54300-08-2	150	107	150.079	C8H10N2O	1174	8988035	7000979	6518965	254428296	267514225	238878531	638011724	724313193	710781196	706382685	737031446	715794095	686532238	709875078	709875078	707520508	707520508	707937201
168	2-Acetyl-1,4,5,6-tetrahydropyridine	25343-57-1	82	125	125.084	C7H11NO	1061	8.25946e+06	7.23119e+06	7.40047e+06	8.30055e+06	7.60722e+06	7.19977e+06	5.17883e+06	6.66372e+06	6.41225e+06	5.34758e+06	5.88476e+06	5.50302e+06	5.14227e+06	5.405e+06	5.405e+06	5.48043e+06	5.48043e+06	5.37566e+06
169	2(1H)-Pyridinone	142-08-5	95	67	95.037	C5H5NO	1094	6263724	5953725	5913312	8459970	8824200	8021643	17698530	22036332	21772325	24730874	26285990	25966835	26735797	27753634	27753634	27300673	27300673	26756283
170	2-Propylimidazole	50995-95-4	82	81	110.084	C6H10N2	1095	5.34112e+06	5.19108e+06	4.92522e+06	1.00778e+07	1.06771e+07	9.43517e+06	2.51306e+07	3.15626e+07	3.12217e+07	3.61954e+07	3.83106e+07	3.78819e+07	3.89952e+07	4.05023e+07	4.05023e+07	4.02177e+07	4.02177e+07	3.9664e+07
171	2-Hexanoylfuran	14360-50-0	110	95	166.099	C10H14O2	1239	5.09629e+06	4.54356e+06	4.2943e+06	4.2386e+06	4.34977e+06	4.28025e+06	3.85484e+06	4.81705e+06	4.7494e+06	3.97015e+06	4.46267e+06	3.95947e+06	3.90482e+06	4.18261e+06	4.18261e+06	4.25899e+06	4.25899e+06	4.19387e+06
172	Furaneol	3658-77-3	128	57	128.047	C6H8O3	1070	4.25719e+06	4.01156e+06	4.11731e+06	4.80395e+06	4.44867e+06	4.24907e+06	2.94462e+06	3.83808e+06	3.8246e+06	3.13527e+06	3.4455e+06	3.17443e+06	3.02677e+06	3.19789e+06	3.19789e+06	3.32547e+06	3.32547e+06	3.28511e+06
173	1-(2-Hydroxyethyl)-1,2,4-triazole	3273-14-1	70	82	113.059	C4H7N3O	1095	3.01375e+06	2.85234e+06	2.7115e+06	6.83065e+06	7.36451e+06	6.45346e+06	1.84954e+07	2.32791e+07	2.29144e+07	2.69464e+07	2.87304e+07	2.86627e+07	2.94649e+07	3.05025e+07	3.05025e+07	3.03478e+07	3.03478e+07	3.00352e+07
174	2-Thiophenemethanethiol	6258-63-5	97	45	129.991	C5H6S2	1105	2.90909e+06	2.82258e+06	2.68062e+06	5.11772e+06	5.43125e+06	4.7932e+06	1.2693e+07	1.59513e+07	1.57597e+07	1.85975e+07	1.95317e+07	1.94528e+07	1.99588e+07	2.08421e+07	2.08421e+07	2.07515e+07	2.07515e+07	2.04449e+07
175	Hygrine	496-49-1	84	42	141.115	C8H15NO	1092	2.88495e+06	2.67083e+06	2.5024e+06	6.68718e+06	7.2401e+06	6.32928e+06	1.87758e+07	2.32535e+07	2.33122e+07	2.76105e+07	2.90899e+07	2.89405e+07	3.00188e+07	3.11709e+07	3.11709e+07	3.09712e+07	3.09712e+07	3.07162e+07
176	1-Ethenyl-2-pyrrolidinone	88-12-0	56	111	111.068	C6H9NO	1102	2830414	2761994	2488378	7441489	8259420	7177181	20782466	25612547	25572197	30078232	32375806	32283593	32848188	34425169	34425169	34340330	34340330	34227624
177	3-Ethylthiophene	1795-01-3	97	112	112.035	C6H8S	869	2.19717e+06	1.74777e+06	1.55109e+06	1.09965e+06	961037	1.81129e+06	1.9342e+06	1.01929e+06	1.40337e+06	1.56449e+06	1.07576e+06	1.49389e+06	1.52616e+06	1.35283e+06	1.35283e+06	1.44571e+06	1.44571e+06	1.52739e+06
178	6-Methyloxan-2-one	823-22-3	42	70	114.068	C6H10O2	1095	1.33595e+06	1.27572e+06	1.26543e+06	3.36104e+06	3.55816e+06	3.07392e+06	8.53027e+06	1.04851e+07	1.01725e+07	1.19473e+07	1.28128e+07	1.28115e+07	1.31068e+07	1.36495e+07	1.36495e+07	1.3459e+07	1.3459e+07	1.32905e+07
179	Trans-Linalool oxide (furanoid)	34995-77-2	59	94	170.131	C10H18O2	1086	1152957	1036948	877778	3108233	3465278	2766709	4942947	6784572	7112502	8893777	9644857	9109828	9227582	9959706	9959706	10349833	10349833	10225461
180	3-Imidazol-1-ylpropanenitrile	23996-53-4	81	121	121.064	C6H7N3	1159	849643	755227	733954	1.33157e+06	1.34085e+06	1.26437e+06	2.08921e+06	2.57057e+06	2.43606e+06	2.32322e+06	2.54157e+06	2.41092e+06	2.32503e+06	2.36138e+06	2.36138e+06	2.35114e+06	2.35114e+06	2.39455e+06
181	6-Ethenyl-2,2,6-trimethyloxan-3-ol	14049-11-7	68	59	170.131	C10H18O2	1173	828139	765790	722411	1718135	1.86873e+06	1644865	1983332	2718363	2494341	2920663	3178505	2887776	2949058	3142082	3142082	3097367	3097367	3154474
182	3-Acetyl-2,5-dimethyl furan	10599-70-9	123	138	138.068	C8H10O2	1099	747188	704740	672685	1139601	1204021	1081046	2620555	3361050	3310853	3871498	4105311	4085978	4185605	4422637	4422637	4353445	4353445	4298606
183	2-Acetyl-2-methyl-1,3-dithiolane	33266-07-8	119	59	162.017	C6H10OS2	1252	689505	546767	505201	617422	778099	722449	724002	896600	940039	684558	804615	822316	888504	866763	866763	860962	860962	795948
184	3-Ethyl-4-methylpyrrole-2,5-dione	20189-42-8	139	67	139.063	C7H9NO2	1239	598579	530138	496589	492675	506197	493906	435787	543247	522733	444402	499542	445839	436503	472016	472016	485926	485926	479384
185	Trans-o-Dithiane-4,5-diol	14193-38-5	152	108	151.997	C4H8O2S2	1466	565738	400566	346343	191577	227096	233076	185762	206238	269232	178885	198793	179037	162979	164473	164473	168222	168222	186903
186	Oxan-2-ylmethanol	100-72-1	85	41	116.084	C6H12O2	992	539467	422007	413132	566778	741954	693623	734919	760058	803896	580859	691748	752829	871794	843039	843039	806993	806993	803287
187	1,3-Dimethylpiperidin-4-one	4629-80-5	127	126	127.1	C7H13NO	1065	521817	470050	479809	555246	499285	503204	356381	439490	417020	332183	389954	362544	358599	374941	374941	365141	365141	364570
188	(Z)-Furanoid linalool oxide	5989-33-3	59	94	170.131	C10H18O2	1074	476586	405551	356945	617862	664298	536721	543795	753659	860466	789366	868039	804114	797473	869519	869519	949471	949471	1506470
189	Isobutylpyrazine	29460-92-2	94	41	136.1	C8H12N2	1074	419433	347255	296484	554271	601756	540103	531496	733035	850177	760696	823326	777033	764984	825723	825723	909147	909147	1.42521e+06
190	2-Methoxy-3-isopropylpyrazine	25773-40-4	137	152	152.095	C8H12N2O	1097	365166	341745	326717	1.36441e+06	1.50106e+06	1.27796e+06	5043879	6481713	6216658	8271609	8828635	8742896	8989000	9324528	9324528	9241116	9241116	9021285
191	5-(Tetrahydro-2h-pyran-2-yloxy)-1-pentanol	76102-74-4	85	69	188.141	C10H20O3	1486	329749	262615	225276	467766	532327	517913	483893	532043	697219	520978	665193	582240	584448	749306	749306	634641	634641	644300
192	3-Chloro-1,2,4-triazole	6818-99-1	42	103	102.994	C2H2ClN3	1237	310638	287136	298692	284669	303243	291608	259536	340285	354603	276895	302156	286425	264873	298222	298222	294998	294998	279971
193	1,3,5-Trimethyl-1h-pyrazole	1072-91-9	110	109	110.084	C6H10N2	1032	297751	221076	216448	1.31578e+06	1.19754e+06	1.20529e+06	1.45602e+06	1.74672e+06	1.91073e+06	2.43032e+06	2.50941e+06	2.37554e+06	2.61334e+06	2.79551e+06	2.79551e+06	3.22822e+06	3.22822e+06	3.3576e+06
194	2,3-Dimethyl-5-ethylpyrazine	15707-34-3	135	136	136.1	C8H12N2	1090	281983	260354	235197	1.0437e+06	1.07936e+06	897226	1.6044e+07	2.05972e+07	2.01147e+07	1.83709e+07	2.01855e+07	1.91668e+07	2.49986e+07	2.55555e+07	2.55555e+07	2.52217e+07	2.52217e+07	2.7276e+07
195	5-Dimethyl-2-furanmethanol, 5-ethenyltetrahydro-α	104188-13-8	111	93	156.115	C9H16O2	1066	265452	236690	207169	328782	378095	308562	319527	461659	512002	485669	512876	486251	467013	530403	530403	569768	569768	932481
196	1,5-Diazabicyclo[3.1.0]hexane	13090-31-8	83	84	84.069	C4H8N2	951	255654	276431	252562	299093	289898	267781	187569	257723	257414	213377	268826	222118	233354	238128	238128	253980	253980	271839
197	2-Methyl-6-nitropyridine	18368-61-1	92	65	138.043	C6H6N2O2	1183	252610	249335	231065	278086	330650	279663	289417	435064	394592	366154	405500	370675	387059	413006	413006	412376	412376	412720
198	3-Methyl-pyrrolo(2,3-B)pyrazine	20321-99-7	132	133	133.064	C7H7N3	1252	191968	168501	153284	176723	216219	202958	209336	241803	252131	178002	211269	216075	225596	235257	235257	228913	228913	226785
199	2-Isobutylthiazole	18640-74-9	99	58	141.061	C7H11NS	1043	187453	153273	148293	191936	245007	227615	241870	251892	274007	205163	246174	265325	294680	288451	288451	280630	280630	287098
200	5-Acetyl-2,4-dimethylthiazole	38205-60-6	155	140	155.04	C7H9NOS	1270	162988	142238	134963	167449	222330	199420	198657	238428	252691	188485	216866	227935	248283	256460	256460	253192	253192	248252
201	Methylsuccinic anhydride	4100-80-5	42	41	114.032	C5H6O3	1057	146922	115230	121111	142051	144436	139451	122184	142889	143754	114530	131535	111523	137581	139607	139607	126308	126308	144086
202	Sulfurol	137-00-8	112	113	143.04	C6H9NOS	1278	135611	111406	103915	131204	176825	164646	166070	199689	210987	146597	165097	176766	193363	198688	198688	197547	197547	192049
203	2-Isopropyl-5-methylpyrazine	13925-05-8	121	136	136.1	C8H12N2	1059	134145	100399	103865	98931.3	122806	107586	115398	128673	130566	73390.4	87114.7	98446.3	88681.3	95989.4	95989.4	96661.1	96661.1	88427.1
204	2-Pyridinemethanamine	3731-51-9	80	108	108.069	C6H8N2	1054	125124	126736	111686	175228	172508	163953	112397	169904	143112	146198	159712	146268	140481	147135	147135	142352	142352	141835
205	Ethanethioic acid, S-(2-furanylmethyl) ester	13678-68-7	81	53	156.025	C7H8O2S	1172	109354	105605	104450	208283	228133	239756	249723	319224	297751	359613	395432	344065	375971	380974	380974	357542	357542	372728
206	3-Propylpyridine	4673-31-8	92	121	121.089	C8H11N	986	109240	82881	81270.9	125233	146245	142665	257743	318672	203145	169227	216465	235878	185013	185147	185147	152737	152737	137838
207	2,2,5-Trimethylpiperidin-3-one	103634-57-7	71	113	141.115	C8H15NO	1232	93601.1	78288.7	72986.5	94939.3	124998	120425	139250	159736	175262	126186	146308	145498	163246	165187	165187	163312	163312	165329
208	2-Methyl-3,5-diethylpyrazine	18138-05-1	149	150	150.116	C9H14N2	1162	88434.9	62062.8	58190.5	2.91527e+06	3.05552e+06	2.75304e+06	1.09716e+07	1.41308e+07	1.33941e+07	1.31573e+07	1.48316e+07	1.36883e+07	1.29259e+07	1.34834e+07	1.34834e+07	1.35493e+07	1.35493e+07	1.39577e+07
209	5-Valerolactone	542-28-9	42	41	100.052	C5H8O2	961	79488	47033.4	63049.8	86483.3	104461	113006	88957.1	94708.3	96883.9	80874.8	89484.3	103097	97389	112569	112569	93193.4	93193.4	103738
210	5-(sec-Butyl)-2,3-dimethylpyrazine	32263-00-6	136	135	164.131	C10H16N2	1229	78922	56986	48875	125871	150664	128984	118459	149250	182911	133303	148544	143222	116919	140054	140054	158669	158669	155467
211	3-Ethyl-2,6-[iperidinedione	25115-69-9	113	41	141.079	C7H11NO2	1215	78195	65762	62452	62941	77573	70821	73280	91809	103172	69060	86473	88779	91536	94433	94433	94241	94241	95268
212	5,5-Dimethyl-2-pyrazoline	4320-85-8	83	42	98.084	C5H10N2	983	75657.6	58204.1	55460.1	139183	167643	151106	341983	437514	433460	403675	440675	436014	440610	464558	464558	477422	477422	478526
213	5-Octanolide	698-76-0	99	71	142.099	C8H14O2	1288	73042	57648.2	52280.1	76692.6	97117.2	97640	75763.7	106271	124130	81357.8	80623.9	84679.1	99850.6	96320.8	96320.8	113270	113270	115849
214	1H-Tetrazole	288-94-8	42	41	70.028	CH2N4	1019	69582	59808	51025	76833	88607	88293	90583	100359	163186	74942	86345	96210	102612	117100	117100	285917	285917	67274.4
215	3-Methyl-4,5-diamino-1,2,4(4h)-triazole	21532-07-0	113	42	113.07	C3H7N5	1219	66180.4	56709.1	58097.4	65566.4	85234.4	77442.3	77035.5	92540.9	102570	66212.9	85361.3	88842.1	91076.7	95221.2	95221.2	96796.1	96796.1	97132.9
216	3,6-Dimethyl-2,3,3A,4,5,7A-hexahydrobenzofuran	70786-44-6	137	109	152.12	C10H16O	1192	65255.1	58142.2	46780.8	510983	562585	483498	1.36242e+06	1.79652e+06	1.78053e+06	2.5441e+06	2.77019e+06	2.61932e+06	2.76784e+06	2.85523e+06	2.85523e+06	2.86264e+06	2.86264e+06	2.95127e+06
217	2-Acetyl pyrrole	1072-83-9	94	109	109.053	C6H7NO	1063	59079.1	71392	79133.8	74607.6	73691.9	65969.1	120983	130748	404857	262049	219427	195656	227609	306844	306844	485729	485729	586240
218	Isomaltol	3420-59-5	111	126	126.032	C6H6O3	989	56352.4	50440.4	40690.5	235748	250606	216177	666142	887791	813499	834908	923463	893855	925462	975481	975481	1.0027e+06	1.0027e+06	971557
219	2-N-pentylthiophene	4861-58-9	97	98	154.082	C9H14S	1170	55037	46829	43304	124721	140544	125694	151206	178004	173263	210597	232005	207867	232615	234809	234809	231221	231221	249110
220	3,5-Dimethyl-1-nutylpyrazole	2655-37-0	109	96	152.131	C9H16N2	1192	49026	30536.7	34409	185936	197518	163364	501451	662345	672537	918121	1129636	1088115	1104831	1038147	1038147	1095309	1095309	1103409
221	Ethyl 3-(2-furyl)propionate	10031-90-0	81	94	168.079	C9H12O3	1192	47018.6	59655	36698.8	459271	547005	407880	1345960	1538288	1562958	2336145	2428033	2369045	2381828	2563378	2563378	2636416	2636416	2568486
222	2-Butyl-5-propylthiazole	52414-86-5	141	154	183.108	C10H17NS	1419	44624	37773	35078	38718	50966	47667	52600	65014	75683	52347	62794	62356	67077	71896	71896	73078	73078	76602
223	Tropine	120-29-6	82	83	141.115	C8H15NO	1223	42925.4	30711.8	29713.9	188428	246889	225839	1.46033e+06	2.05446e+06	2.23607e+06	1.74068e+06	2.03267e+06	2.10422e+06	2.01946e+06	2.1783e+06	2.1783e+06	2.18428e+06	2.18428e+06	2.11507e+06
224	1H-Pyrrole-2-carboxaldehyde	1003-29-8	95	94	95.037	C5H5NO	1012	35894	24725	24600.6	78727.1	84430.9	73417.6	108732	148553	145570	116642	118879	126168	133020	143377	143377	135218	135218	121542
225	Anabasine	494-52-0	84	105	162.116	C10H14N2	1514	34804.4	27368.3	17241.9	146414	159801	141199	1.35998e+06	1.47202e+06	1.62261e+06	1.84081e+06	2.00086e+06	1.98932e+06	2.14702e+06	2.25708e+06	2.25708e+06	2.15996e+06	2.15996e+06	2.51577e+06
226	2,5-Dibutoxy-2,5-dihydrofuran	20295-23-2	85	141	214.157	C12H22O3	1441	34166	30320	26192	43012	52123	47990	53708	83195	80594	73696	71702	68188	79805	83742	83742	82587	82587	85021
227	2-Hexylthiophene	18794-77-9	97	98	168.097	C10H16S	1277	33399	38307	34729	36927	47628	44761	45550	46508	47124	40879	39751	41884	51116	42371	42371	47772	47772	51489
228	3-Methoxy-2,5-dimethylpyrazine	19846-22-1	138	137	138.079	C7H10N2O	1057	32479.2	26447.5	26943.4	59752.3	63633	63966.3	43647.8	48977	48489.7	33583.1	38921.6	38213.5	36824.7	41078.5	41078.5	42922.8	42922.8	39681.6
229	6-Dimethyl-(1α,4α,4Aα,5Aα)-1,4-methano-1H-cyclopropa[d]pyridazine, 4,4A,5,5A-tetrahydro-6	109746-10-3	93	91	136.1	C8H12N2	1225	31310.6	16289.3	11966.5	70715.3	84711.6	76762.3	99872.6	145252	138470	143037	157132	142907	143188	141522	141522	162815	162815	175779
230	3,5-Dimethyl-2-ethylpyrazine	13925-07-0	135	136	136.1	C8H12N2	1084	25032	18813	18869.3	36388.6	39685.7	36073.2	40910	50626	57871.9	61179.4	57244	57057	53469	55850	55850	60876.5	60876.5	66605.6
231	1H-Pyrrole-2,5-dione	541-59-3	97	54	97.016	C4H3NO2	1033	24886.9	24115.6	19869.1	34656.6	37868.5	42487.1	27823.9	28244.1	28642.8	23922	20174.8	23883.6	24575.6	22144.9	22144.9	35661.4	35661.4	43073.5
232	2-Methyl-3-(methylthio)pyrazine	2882-20-4	140	107	140.041	C6H8N2S	1184	24467	20806.8	21784	29759	35989.9	28651	28757	39605	44964	38447	41395.2	43128	41379	41077	41077	45792	45792	42708.6
233	3-Ethyl-2,5-dimethylpyrazine	13360-65-1	135	136	136.1	C8H12N2	1081	24396.9	19437.2	20305.3	51114.7	51870.2	44613.1	25851.9	34535.6	57565.1	30627.7	29703.8	29183.9	30956.8	36152.4	36152.4	52159	52159	56068.1
234	2-Pentanoylthiophene	53119-25-8	111	126	168.061	C9H12OS	1328	24014.4	14090	16785	19086	23827	26056.1	17927	26102.9	25451	21589.2	20010.5	19192.8	25641	26291.2	26291.2	23402.2	23402.2	25604.2
235	3-Isopentyl-2,5-dimethylpyrazine	18433-98-2	122	135	178.147	C11H18N2	1317	22939.2	14642.4	17478.3	15308.6	12561.5	15869.7	13972.8	15286.5	36125	12801	11784.5	9690.93	20037	18868.7	18868.7	18128	18128	18827.8
236	4-Methylurazole	16312-79-1	115	58	115.038	C3H5N3O2	1039	22325.9	23687.8	18675.6	26720.6	32906.4	36421.3	61764.6	73447.1	72475.2	43593.4	49803.2	50914.6	43080.5	45443.1	45443.1	43083.2	43083.2	49273.9
237	6-Propyl-2,3,4,5-tetrahydropyridine	1604-01-9	97	96	125.12	C8H15N	1028	20560.9	11462	12071	23496.2	22409.5	20886.2	35141.3	44912.1	52014.1	40366.5	54620.8	45083.5	44501.1	45494.8	45494.8	89019.2	89019.2	85387.7
238	2,4-Dimethyl-2-oxazoline-4-methanol	39986-37-3	98	42	129.079	C6H11NO2	1031	15553.5	23523.4	16872.8	25126.6	33052	28873.4	24365.3	26901.6	33032.9	24749	25499.5	23159.4	23764.2	27305.5	27305.5	27264.4	27264.4	27042.9
239	3-N-Propyl-2-pyrazolin-5-one	29211-70-9	98	97	126.079	C6H10N2O	1071	15268.4	13428.9	8332	41353	43026	42529	74198.7	95024	78232	58960	78521	82467	46535.4	47088.7	47088.7	48762.6	48762.6	51689.6
240	cis-2-(2-Pentenyl)furan	70424-13-4	107	136	136.089	C9H12O	1002	14795	10003	9883	18153	21564	16825	8617	14558	14192	4311	7323	7324	6786	7634	7634	8273	8273	13550
241	1H-Imidazole-4-methanol	822-55-9	97	98	98.048	C4H6N2O	1080	12254	10926.5	11294	16619.4	19255.7	16963	17169	20814.9	22130.7	18072	19459	22409	27882.5	25101	25101	23812.3	23812.3	22354
242	3-Methyl-2-vinylmaleimide	21494-57-5	137	66	137.048	C7H7NO2	1261	12035	11713	6321	18602	15227	12749	11857	17560	23729.4	11460	11766	11176	12595	14082	14082	23232	23232	24632
243	5-Hexyldihydro-4-methyl-trans-2(3H)-furanone	147254-33-9	99	41	184.146	C11H20O2	1444	11766	9028.61	6911.86	15920.1	21949.7	19033.9	20288.9	28135.6	32127.5	27927.5	28086.3	26858.8	34497.9	35532.7	35532.7	36525.9	36525.9	30611.8
244	5-(Acetyloxy)dihydro-5-methyl-2(3H)-furanone	57681-51-3	99	71	158.058	C7H10O4	1226	9930.24	8578.75	7674.57	9024.7	12972.8	11863.6	19489.8	25298.3	25218.7	20827.7	22233.3	22764	24063.2	28165.8	28165.8	24947.2	24947.2	25290.7
245	2-Methyl-4,5-dihydro-1H-imidazole	534-26-9	55	84	84.069	C4H8N2	914	7970.47	6830.85	7199.47	32206	36793	38121	38483	48463	50902	43713	40397	42408	31879	38747	38747	39119	39119	35786
246	1,5,6-Trimethyl-azacyclohexan-3-one	339590-59-9	98	71	141.115	C8H15NO	1126	7666	5260	7665	5443	8452	6922	10486	7505	8726	8235	9901	16651	13648	11476	11476	13587	13587	12465
247	2-Dimethyl-2H-1-benzopyran, 6,7-dimethoxy-2	644-06-4	205	220	220.11	C13H16O3	1658	7545.41	5415.91	5040.48	39011.3	43701	45795.8	240447	268896	376783	659505	670545	624593	693135	949351	949351	1.08729e+06	1.08729e+06	1.26492e+06
248	8-Methyl- exo-8-azabicyclo[3.2.1]octan-3-ol	135-97-7	82	96	141.115	C8H15NO	1234	7406.68	13438	8905	295801	408162	336544	2193818	3147024	3287358	2270356	2617467	2780374	3039225	3287750	3287750	3154385	3154385	3226828
249	2-Acetylbenzofuran	1646-26-0	145	160	160.052	C10H8O2	1395	7210.47	5300.22	6980.34	10147.9	11283	14350.1	34091.6	44345.3	44031.4	73796.8	87559.9	84608.9	92242.9	98230.6	98230.6	97567.9	97567.9	117231
250	2,2'-Isopropylidenebis(5-methylfuran)	59212-75-8	189	204	204.115	C13H16O2	1458	7102.28	2992.64	5304.45	17642.1	21187.8	21162.6	145921	171694	196267	346386	396535	400429	428627	465082	465082	448490	448490	629670
251	2,3-Dimethylquinoxaline	2379-55-7	117	158	158.084	C10H10N2	1428	6452.69	8491.04	5505	19882.2	30951	17062	104248	116526	120392	204931	239558	214076	236252	277033	277033	188026	188026	300371
252	3-(Pyrrolidin-2-yl)pyridine	5746-86-1	119	70	148.1	C9H12N2	1435	4640	7657.33	6096.66	52385.5	73832	80491	317884	385057	427093	577536	681890	690069	779397	802567	802567	818005	818005	950251
253	2-Ethylpiperidine	1484-80-6	84	56	113.12	C7H15N	1026	4432.45	3094.97	3272.82	6406.39	7203.58	4066.78	13279.5	14912.8	16331.2	11373.7	16851.8	14623.7	12022.9	19281.3	19281.3	15088.6	15088.6	23902.9
254	2-Ethyl-1-benzothiophene	1196-81-2	162	147	162.05	C10H10S	1412	3756	2089	2278	8989	11452	10772	16594	19950	20784	25320	35643	32443	37739	40015	40015	37762	37762	46639
255	2,3,5-Trimethylpyrazine	14667-55-1	42	122	122.084	C7H10N2	1004	0	0	0	1.92711e+06	2.01255e+06	1.80692e+06	4.45301e+06	5.67517e+06	5.42781e+06	4.55514e+06	4.84649e+06	4.92801e+06	5.16829e+06	5.40142e+06	5.40142e+06	5.39238e+06	5.39238e+06	5.01237e+06
256	5-Ethyl-2-methylpyrazine	13360-64-0	121	122	122.084	C7H10N2	1005	0	0	0	73719	77325	63120.7	45775.4	54235	100503	39377.6	39926	41603.8	45183	45208.7	45208.7	87301	87301	114077
257	2-Methyl-2,5-divinyltetrahydrofuran	104188-15-0	67	55	138.104	C9H14O	914	0	0	0	367398	397234	340046	511045	676089	703321	338499	352115	339205	314453	360162	360162	371728	371728	374792
258	1,4-Epoxyoctane	1004-29-1	71	43	128.12	C8H16O	1004	0	0	0	116896	124572	108178	312936	394016	381668	323133	330696	343752	349146	388553	388553	370871	370871	340447
259	5-Ethenyl-4-methylthiazole	1759-28-0	125	97	125.03	C6H7NS	1027	0	0	0	8579	8970.66	10912	14150.7	20643	18424	17091	20555	20183	20932	22084	22084	25592	25592	31043
260	Guvacoline	495-19-2	82	126	141.079	C7H11NO2	1250	0	0	0	0	0	0	17026	30181	34314	53077	57462	44136	47301.8	62771	62771	55854	55854	56072
261	1-(5-Dimethylethyl)pyrazin-2-yl-ethan-1-one	182306-61-2	163	136	178.111	C10H14N2O	1344	0	0	0	5270.86	8628.93	8250.41	32056.5	34125.5	30607.9	38973.1	38668	37243.8	39850.5	38167.6	38167.6	42604.1	42604.1	41582.3
262	3-Acetyl-2,5-dimethylbenzo(B)thiophene	6179-04-0	189	204	204.061	C12H12OS	1697	0	0	0	0	0	0	0	0	0	0	0	0	0	0	0	0	0	20457
263	6-Pentyl-2H-pyran-2-one	27593-23-3	95	82	166.099	C10H14O2	1453	0	0	0	6373.19	8611.62	5576.29	54677.4	74361.3	153110	106286	116189	121700	149625	165076	165076	191260	191260	216503
264	Massoia lactone	54814-64-1	97	68	168.115	C10H16O2	1501	0	0	0	143533	186920	165856	1.46678e+06	1.62628e+06	1.80258e+06	2.12411e+06	2.30919e+06	2.2046e+06	2.5021e+06	2.61737e+06	2.61737e+06	2.54213e+06	2.54213e+06	2.91602e+06
265	N-Benzyloxy-2-carbomethoxyaziridine	53084-33-6	91	92	207.09	C11H13NO3	1550	0	0	0	0	0	0	520453	626445	1.19388e+06	1.69309e+06	1.76788e+06	1.59334e+06	2.19748e+06	2.65938e+06	2.65938e+06	2.97015e+06	2.97015e+06	3.35318e+06
266	6-Amino-2-methylquinoline	65079-19-8	158	157	158.084	C10H10N2	1650	0	0	0	0	0	0	16895.9	18171	50200	33399	31113	21251	47218.2	49783.4	49783.4	50345	50345	52072
267	Indole	120-72-9	117	90	117.058	C8H7N	1292	0	0	0	4.11363e+07	4.38078e+07	4.40664e+07	5.04564e+08	5.37032e+08	5.54233e+08	6.53392e+08	6.58795e+08	6.4756e+08	6.85043e+08	6.63205e+08	6.63205e+08	6.96393e+08	6.96393e+08	7.02166e+08
268	3-Methyl-2(3H)-benzofuranone	32267-71-3	120	91	148.052	C9H8O2	1333	0	0	0	2.16153e+07	2.55558e+07	2.59432e+07	1.68711e+08	1.8611e+08	2.12697e+08	2.71634e+08	2.75066e+08	2.51774e+08	2.82924e+08	2.99013e+08	2.99013e+08	3.06924e+08	3.06924e+08	3.07952e+08
269	2,2'-Ethylidenebis(5-methylfuran)	3209-79-8	175	190	190.099	C12H14O2	1379	0	0	0	12869.7	15818.9	15677.4	33110	39980.1	47122.7	52037.7	56894.3	50472.3	66219.8	72557.5	72557.5	69569.9	69569.9	80664.1
270	N-Butyl-1-(pyridin-2-yl)methanimine	7032-24-8	119	92	162.116	C10H14N2	1401	0	0	0	118083	115280	98803	320258	358491	411298	476492	572185	545452	656150	593171	593171	652348	652348	732383
271	2-Hydroxymethylbenzimidazole	22128-99-0	148	147	148.064	C8H8N2O	1437	0	0	0	0	0	0	4109.05	5312.53	7070.85	9110.89	13041.8	12096.7	14500.4	14617.2	14617.2	12345.4	12345.4	14063.9
272	Coumarin	91-64-5	146	118	146.037	C9H6O2	1440	0	0	0	0	0	0	2979.9	3248.74	2846.37	4946.6	4734.36	7634.91	7307.28	9089.62	9089.62	6512.04	6512.04	10771.7
273	3-Methylcoumarin	2445-82-1	131	160	160.052	C10H8O2	1490	0	0	0	10540.1	13708.6	22157	90412.3	92047.3	88102.3	81733	116419	109611	108553	106541	106541	90800.5	90800.5	97407.4
274	5,6-Dihydro-5-methyluracil	696-04-8	42	128	128.059	C5H8N2O2	1524	0	0	0	27246.3	32199.4	22361.5	65698.4	76591.8	81652.7	107819	126099	123764	132742	141610	141610	143601	143601	146299
275	Patulin	149-29-1	55	110	154.027	C7H6O4	1545	0	0	0	17589	14603.3	15967	70750	63630	77818	101506	123824	113254	135073	135536	135536	141460	141460	160476
276	Pentylenetetrazol	54-95-5	55	82	138.091	C6H10N4	1560	0	0	0	0	0	0	79669.6	96242.7	146909	201721	185365	192203	299103	318317	318317	374560	374560	469822
277	7(1H)-Pteridinone	2432-27-1	148	120	148.039	C6H4N4O	1577	0	0	0	0	0	0	27067	28828.7	37894.6	56856.6	58636.3	54188.7	61541	69858.5	69858.5	72144.9	72144.9	90128.9
278	4-Hydroxycoumarin	1076-38-6	120	162	162.032	C9H6O3	1656	0	0	0	0	0	0	29540.2	31206.6	51243.1	71206.4	75647	65112.9	86095.8	98788.4	98788.4	113150	113150	127691
279	3-Butylisobenzofuran-1(3H)-one	6066-49-5	133	105	190.099	C12H14O2	1656	0	0	0	0	0	0	40921	36561.1	64755.3	90275.4	93950.6	79336.5	137138	128708	128708	129998	129998	130928
280	(1R,4S,9As)-1-Methyl-4-((Z)-pent-2-en-4-yn-1-yl)octahydro-1H-quinolizine	151805-13-9	152	110	217.183	C15H23N	1679	0	0	0	0	0	0	29879	49658	75072	122734	111746	111657	140529	175771	175771	218723	218723	274785
281	1-(4-Acetylphenyl)piperazine	51639-48-6	162	204	204.126	C12H16N2O	1610	0	0	0	4952.34	3208.72	6810.28	38874.2	40456.5	46322.6	82795.1	80070.8	81524	110139	101583	101583	127733	127733	136564
	Ketone
282	Ketone, methyl 2,2,3-trimethylcyclopentyl	17983-22-1	69	84	154.136	C10H18O	1092	1.44301e+07	1.37287e+07	1.30157e+07	4.19222e+07	4.5026e+07	3.9049e+07	1.18737e+08	1.46676e+08	1.43581e+08	1.69798e+08	1.80586e+08	1.79876e+08	1.85505e+08	1.91374e+08	1.91374e+08	1.89641e+08	1.89641e+08	1.86466e+08
283	2,6,6-Trimethylbicyclo[3.2.0]hept-2-en-7-one	4613-37-0	80	79	150.104	C10H14O	1108	1.00602e+07	9.39663e+06	9.46464e+06	4.0707e+07	4.41655e+07	3.84152e+07	1.29408e+08	1.61267e+08	1.59945e+08	1.91977e+08	2.01515e+08	2.00145e+08	2.07212e+08	2.14104e+08	2.14104e+08	2.12968e+08	2.12968e+08	2.10113e+08
284	Cashmeran	33704-61-9	191	135	206.167	C14H22O	1508	7.03144e+06	5.14891e+06	4.24124e+06	4.66642e+06	5.41576e+06	5.39062e+06	7.36583e+06	8.70189e+06	1.24895e+07	9.07611e+06	9.41106e+06	8.31976e+06	8.5311e+06	9.67915e+06	9.67915e+06	1.11165e+07	1.11165e+07	1.13716e+07
285	3-(Hydroxymethyl)nonan-2-one	67801-33-6	58	43	172.146	C10H20O2	1093	1.26234e+06	1.25182e+06	1.1942e+06	2.54783e+06	2.72295e+06	2.39433e+06	6.35001e+06	7.93317e+06	7.81224e+06	9.0653e+06	9.69763e+06	9.703e+06	9.89742e+06	1.02734e+07	1.02734e+07	1.02231e+07	1.02231e+07	1.01859e+07
286	4-Undecanone	14476-37-0	57	71	170.167	C11H22O	1208	1.25691e+06	1.02159e+06	952334	1.29024e+06	1.62555e+06	1.53859e+06	1.53287e+06	1.80614e+06	1.92185e+06	1.37001e+06	1.64719e+06	1.74343e+06	1.93188e+06	1.93765e+06	1.93765e+06	1.88616e+06	1.88616e+06	1.88797e+06
287	Oxypinocamphone	10136-65-9	71	99	168.115	C10H16O2	1256	959725	761990	739084	1.02507e+06	1.25711e+06	1.21153e+06	1.18489e+06	1.38396e+06	1.44254e+06	1.04871e+06	1.28627e+06	1.27603e+06	1.38011e+06	1.41546e+06	1.41546e+06	1.38273e+06	1.38273e+06	1.39599e+06
288	2',4'-Dimethylacetophenone	89-74-7	133	105	148.089	C10H12O	1253	366034	302335	281597	317866	406491	379683	402793	473719	526776	379087	463822	446331	489297	496652	496652	513902	513902	497574
289	2-Hex-2-enylcyclopentan-1-one	34687-46-2	84	41	166.136	C11H18O	1320	274995	209053	185631	280583	362032	338663	414096	505808	578883	381316	438259	451123	483840	513782	513782	512550	512550	520833
290	2,2,6-Trimethylcyclohexan-1-one	2408-37-9	82	56	140.12	C9H16O	1036	257315	232789	222106	652613	645387	561001	495539	625474	666233	506513	480485	489079	525687	593416	593416	634968	634968	610272
291	6,7-Dodecanedione	13757-90-9	99	71	198.162	C12H22O2	1486	241700	171031	138246	239213	221731	230700	291781	362228	416133	295940	306014	294083	319893	348208	348208	331698	331698	338309
292	2-Methyl-4,6-octadiyn-3-one	29743-33-7	91	106	134.073	C9H10O	1023	240387	157225	147409	5.77788e+06	6.2966e+06	5.40164e+06	1.80965e+07	2.143e+07	2.20395e+07	3.94813e+07	3.8913e+07	3.74454e+07	4.32242e+07	4.50829e+07	4.50829e+07	4.83848e+07	4.83848e+07	4.98321e+07
293	6-Methylhept-5-en-2-one	110-93-0	108	111	126.104	C8H14O	986	175545	146708	134603	684017	721072	629189	1.97259e+06	2.59641e+06	2.53853e+06	2.48875e+06	2.73479e+06	2.61927e+06	2.653e+06	2.8292e+06	2.8292e+06	2.92834e+06	2.92834e+06	2.85902e+06
294	1,2-Epoxy-p-menthane-3-one	5286-38-4	69	55	168.115	C10H16O2	1256	171494	172340	130786	223958	218533	209998	212108	246433	383010	203762	318842	244952	317609	277811	277811	315811	315811	373830
295	1,2-Cyclohexanedione	765-87-7	55	112	112.052	C6H8O2	1062	145912	127492	147316	179030	193497	184235	161998	196355	200337	154739	182818	181812	181346	193628	193628	202487	202487	187508
296	α-Damascone	24720-09-0	69	123	192.151	C13H20O	1395	141894	116405	96891.8	229245	282150	272815	299962	342537	385107	388093	434410	434537	479862	518588	518588	499726	499726	571210
297	3'-Methylacetophenone	585-74-0	119	91	134.073	C9H10O	1182	121024	95188	85618.9	2.11502e+06	2.37779e+06	2.00511e+06	6.27863e+06	8.00882e+06	8.03829e+06	1.16152e+07	1.2575e+07	1.19934e+07	1.24723e+07	1.31135e+07	1.31135e+07	1.31774e+07	1.31774e+07	1.3459e+07
298	1-Cyclopropylpropan-1-one	6704-19-4	69	41	98.073	C6H10O	756	113828	109722	94028.7	111122	120326	96760.1	96294.8	105204	86422.5	111058	129900	109323	108169	121714	121714	137530	137530	124016
299	2-Pentyl-2-cyclopenten-1-one	25564-22-1	96	97	152.12	C10H16O	1292	103851	91388	87119	118330	147905	141067	121283	162570	163586	106190	119794	125089	120282	127898	127898	120384	120384	123743
300	Acetophenone	98-86-2	105	77	120.058	C8H8O	1065	103322	124446	87900.4	173152	203191	216822	186057	287860	263919	306110	308839	269768	362923	378599	378599	323758	323758	311718
301	3-Nonen-5-one	82456-34-6	83	55	140.12	C9H16O	1052	102888	75302.8	71712.2	90994.6	132100	124049	147670	146939	160076	124062	158867	163824	187650	188865	188865	178707	178707	186537
302	3,5-Octadien-2-one	30086-02-3	95	43	124.089	C8H12O	1073	99929	75273	71579	252396	262602	217585	145372	215490	227091	172268	184606	177952	166584	197482	197482	209778	209778	269594
303	(E)-Ocimenone	33746-72-4	135	150	150.104	C10H14O	1239	99819	79620	88960	86711	84103	77583	67253	93108	77990	67280	68121	72291	71960	83648	83648	73474	73474	63789
304	2-Azabicyclo[3.2.1]octan-3-one	26396-67-8	96	125	125.084	C7H11NO	1025	89608	43005	46436	59055	70674	65415	95502	129955	156098	113172	131377	116383	107765	120224	120224	228316	228316	223532
305	1-Phenylhexan-3-one	29898-25-7	91	105	176.12	C12H16O	1427	82655.7	60114.5	60919.1	180538	225875	220110	699653	818936	957247	1.33811e+06	1.63749e+06	1.63819e+06	1.7431e+06	1.83782e+06	1.83782e+06	1.83812e+06	1.83812e+06	2.51678e+06
306	2-Methyl-3-propan-2-ylcyclopentan-1-one	54549-81-4	69	41	140.12	C9H16O	1028	76859.3	69247.7	67643.2	135905	156808	151222	127687	155335	141878	126828	134435	137970	134850	134249	134249	148456	148456	160383
307	(E)-Oct-3-en-2-one	18402-82-9	111	55	126.104	C8H14O	1035	71933.1	35916	42644.8	123301	137814	113665	119610	124005	855844	188369	188912	162078	458928	530964	530964	796222	796222	789664
308	2,3-Hexanedione	3848-24-6	71	114	114.068	C6H10O2	786	69765	62555.8	55760	62803.4	84318.6	90265	85088	68167.5	56582.9	58090	65231.2	82251.3	81642.6	103433	103433	81574	81574	70804
309	Gallacetophenone	528-21-2	153	168	168.042	C8H8O4	1453	69139.5	36947.3	35022.1	25624.7	32759.5	30169.6	35757.3	47978.5	46002.5	50407.1	38240.7	52795.4	36968.6	49197.4	49197.4	36270.5	36270.5	35501.7
310	Cyclohexanone	108-94-1	55	42	98.073	C6H10O	894	67217	68682.3	63484.8	57922.6	67836	53833	53905	75213	60223	64622	65701	63152	58892	69294	69294	83220	83220	58737
311	6-Methyl-6-hepten-2-one	10408-15-8	108	58	126.104	C8H14O	966	65639.8	72911.3	72998.5	71472.4	77648.3	77121.1	66964.8	65004.1	61045.9	51492.9	55034.9	52237.3	47963.3	49756.1	49756.1	46753.8	46753.8	43994.3
312	1-(2,3,4,5-Tetramethylphenyl)ethanone	34764-71-1	161	176	176.12	C12H16O	1482	63820.8	39347.5	34022.6	868196	1.10045e+06	1.04638e+06	5.7236e+06	6.6784e+06	7.65522e+06	1.16391e+07	1.33508e+07	1.31127e+07	1.48152e+07	1.5628e+07	1.5628e+07	1.53305e+07	1.53305e+07	1.79462e+07
313	5-Methyl-(E)-2-hepten-4-one	102322-83-8	69	41	126.104	C8H14O	972	59212.7	51147.7	47197.6	65084.2	87231	73465.5	91700.9	94463.3	82165.8	82234.7	105028	95716.4	107845	118770	118770	112778	112778	130032
314	2-Acetyl-4-methyl-1,3-cyclopentanedione	4056-69-3	139	154	154.063	C8H10O3	1300	56864	47769	43012	53637	76580	71616	58032	78009	84313	52671	59578	57678	60431	63483	63483	59502	59502	54769
315	Dehydrodihydroionone	20483-36-7	119	121	192.151	C13H20O	1424	46891	33748	33202	131070	152218	179252	546097	625631	716178	1037412	1199551	1242013	1302615	1366298	1366298	1344205	1344205	1868841
316	2-Undecanone	112-12-9	58	59	170.167	C11H22O	1294	40449	9438.81	6326.67	1.14722e+06	1.33516e+06	1.35712e+06	1.50267e+07	1.72592e+07	1.87008e+07	2.82942e+07	2.97752e+07	2.72466e+07	3.24591e+07	3.27909e+07	3.27909e+07	3.43815e+07	3.43815e+07	3.45715e+07
317	5-Methyl-4-hexen-3-one	13905-10-7	83	55	112.089	C7H12O	1080	40445.6	28126.8	30790	31233.3	40256.3	36896.9	41657.3	50459.4	49722.2	35599	33998.2	42623.5	55104.4	51500.5	51500.5	49967.6	49967.6	53614.9
318	4-Hexen-3-one	2497-21-4	69	41	98.073	C6H10O	855	29353.6	18974.9	16577.1	2.61087e+06	2.85632e+06	2.25495e+06	6.9117e+06	9.08123e+06	8.67958e+06	7.38815e+06	7.90429e+06	7.56792e+06	7.40859e+06	7.63892e+06	7.63892e+06	7.88153e+06	7.88153e+06	7.4243e+06
319	1-Acetyl-2-methyl-1-cyclopentene	3168-90-9	109	79	124.089	C8H12O	996	28194.8	28823	24858.7	44832	42540.5	36739.8	40995.9	39953.9	45027.2	34706.1	36104.8	41306.2	41307.2	46094.6	46094.6	38648.6	38648.6	39685.3
320	3-Penten-2-one	625-33-2	69	41	84.058	C5H8O	733	28066.4	22749.5	25547	22817.9	34546.6	34633.5	25280.9	31777.5	26581.1	20718.4	27675.4	28372.3	24077.4	31238.3	31238.3	24354.2	24354.2	27172.7
321	1,1'-(1,4-Phenylene)bis-ethanone	1009-61-6	147	91	162.068	C10H10O2	1461	23685	17030.9	15329.5	99706.6	111909	111904	805878	954373	1.11119e+06	1.96261e+06	2.26609e+06	2.26916e+06	2.49041e+06	2.59621e+06	2.59621e+06	2.52857e+06	2.52857e+06	3.60161e+06
322	Geranylacetone	689-67-8	69	41	194.167	C13H22O	1452	18724	8195.51	4958	27355	50623	43637	366280	484534	584272	661137	809179	798196	852046	940604	940604	949967	949967	1252252
323	4-Hydroxy-3-methyl-6-(1-methylethyl)-trans-2-cyclohexen-1-one	55955-53-8	98	126	168.115	C10H16O2	1432	17752.8	12253.1	10431.8	16053	25902	22254	22018	30839	34512	24148	30574	35356	29110	33850	33850	26521	26521	33215
324	3-Acetylheptane-2,6-dione	29214-57-1	128	71	170.094	C9H14O3	1260	16772	10264.1	4594.11	11313.3	20435.7	16081.4	17992	20682.8	18451.1	16238.6	16831.8	19856.2	10894.3	12741.7	12741.7	21633.9	21633.9	19421.5
325	Geranylacetone	3796-70-1	69	41	194.167	C13H22O	1453	16304.3	8276.2	8720.96	42926.1	55651.9	63892	320537	407451	504840	796925	982544	943264	1.03203e+06	1.12327e+06	1.12327e+06	1.15204e+06	1.15204e+06	1.47953e+06
326	5,9-Dimethyl-(E)-5,8-decadien-2-one	130876-99-2	107	122	180.151	C12H20O	1320	16278	13509.2	15529.2	20366.2	23887.9	24533.2	17055.4	25181.2	28396.9	13756.8	19504.5	15032.3	14124.3	12013.1	12013.1	17036	17036	13212.6
327	2,2,5-Trimethylhexane-3,4-dione	20633-03-8	57	41	156.115	C9H16O2	1039	13589.8	9815.04	9372.11	16402.3	23519.9	21683.7	18436.8	17431.8	18208.7	16565.3	19472.7	19431.8	18539.7	17659.7	17659.7	19886.8	19886.8	16248.3
328	4-Methyl-5-nonanone	35900-26-6	57	85	156.151	C10H20O	1116	13150	14011	8207	14707	17971	17768	18958	24026	25224	36726	55573	55144	61650	71148	71148	62315	62315	57569
329	2-Hydroxy-1-phenylbutan-1-one	16183-46-3	105	77	164.084	C10H12O2	1390	6265.57	7760.55	5912	96450	98751	92500	619298	723057	848394	1345361	1582934	1552361	1691919	1826066	1826066	1785063	1785063	2232153
330	P-Mentha-8-thiol-3-one	38462-22-5	69	41	186.108	C10H18OS	1369	5488.77	4164.01	3870.93	152798	204116	188093	1.34316e+06	1.83882e+06	2.94681e+06	2.5254e+06	2.76886e+06	2.69335e+06	2.48805e+06	3.27765e+06	3.27765e+06	3.63388e+06	3.63388e+06	3.93617e+06
331	Benzylideneacetone	122-57-6	131	103	146.073	C10H10O	1236	4869	2874.35	5382	4510	6117	5122	7896	4869	5102	5264	7165	4503	5662	4872	4872	6515	6515	6785
332	6,10-Dimethylundecan-2-one	1604-34-8	58	71	198.198	C13H26O	1408	4369.64	5455	6518.58	8616	7476.96	8359.89	18966	22065	27010	24892	23157	21499	25452	21348	21348	24628	24628	26750
333	6-Methyl-5-nonene4-one	7036-98-8	111	43	154.136	C10H18O	1136	4170.17	1394.89	2671.4	1677.08	1019.46	2433.11	8147	9252.46	30834.2	16392.6	12958.5	10458.8	12157.4	20908	20908	41083.5	41083.5	44252.7
334	4-(2,6,6-Trimethyl-1-cyclohexen-1-yl)-2-butanone	17283-81-7	121	161	194.167	C13H22O	1433	2638.76	4421.07	3449.77	19637.5	17705.6	21151.1	59843.9	64761.2	74226.1	106856	119192	127692	138183	143909	143909	142748	142748	175238
335	1-Phenylpentan-1-one	1009-14-9	105	77	162.104	C11H14O	1374	1103.21	1361.17	1208.31	163922	200511	191923	2.20889e+06	2.72669e+06	3.13155e+06	3.25578e+06	3.55999e+06	3.31501e+06	3.60054e+06	3.92086e+06	3.92086e+06	3.92793e+06	3.92793e+06	4.27654e+06
336	4-(Acetyloxy)-(Z)-3-penten-2-one	38365-58-1	100	85	142.063	C7H10O3	1005	0	0	0	29926.4	31709.2	23261.6	61769	80369.1	74043.5	58985.1	56347.6	65339.7	60969	69224.3	69224.3	70515.7	70515.7	60572.1
337	2,2,3-Trimethylcyclobutanone	1449-49-6	70	42	112.089	C7H12O	847	0	0	0	1.07731e+06	1.20149e+06	881302	2.96416e+06	3.95323e+06	3.7477e+06	3.08601e+06	3.36968e+06	3.27638e+06	3.16827e+06	3.30051e+06	3.30051e+06	3.31965e+06	3.31965e+06	3.05062e+06
338	Norbornadieone	10218-02-7	67	54	110.073	C7H10O	913	0	0	0	346453	377568	323210	511040	659825	678344	329403	337498	333151	297074	336571	336571	360642	360642	327480
339	2,2-Dimethyl-3-hexanone	5405-79-8	57	71	128.12	C8H16O	868	0	0	0	680341	765399	582870	706003	922638	982875	607776	579320	616811	1.33545e+06	567942	567942	609681	609681	628606
340	2-Cyclohexen-1-one	930-68-7	68	39	96.058	C6H8O	920	0	0	0	355580	387403	327046	501425	671074	671153	314371	330769	335149	279245	315249	315249	323832	323832	330428
341	1-Hepten-3-one	2918-13-0	55	70	112.089	C7H12O	881	0	0	0	13466	14972	20820.4	15852	14769.2	10843	12185.4	14232.8	12994.4	13031	9970	9970	8100	8100	7237.31
342	4-Acetylanisole	100-06-1	135	150	150.068	C9H10O2	1348	0	0	0	230015	278358	277367	1.99831e+06	2.19443e+06	2.52984e+06	3.32643e+06	3.37461e+06	3.08388e+06	3.50963e+06	3.76788e+06	3.76788e+06	3.84405e+06	3.84405e+06	3.85067e+06
343	2-Pyridin-2-ylmethyl-cyclohexanone	113777-22-3	93	146	189.115	C12H15NO	1619	0	0	0	9	9	9	229284	255550	325751	277664	311147	331100	362127	397391	397391	416485	416485	520493
344	Paroxypropione	70-70-2	121	93	150.068	C9H10O2	1349	0	0	0	2.1463e+06	2.57129e+06	2.62186e+06	1.64723e+07	1.76505e+07	1.98307e+07	2.54717e+07	2.56411e+07	2.3337e+07	2.6266e+07	2.77892e+07	2.77892e+07	2.80808e+07	2.80808e+07	2.803e+07
345	Benzophenone	119-61-9	105	77	182.073	C13H10O	1635	0	0	0	40987.9	41535	50925.5	200027	213721	209029	325852	357601	347195	356720	390263	390263	355055	355055	346050
346	4'-Methylvalerophenone	1671-77-8	119	134	176.12	C12H16O	1440	0	0	0	13772.5	10752.5	19798.5	52784.2	69108.5	84896.3	117233	135150	134245	175125	176061	176061	165539	165539	217823
347	6-Methyl-6-(5-methylfuran-2-yl)heptan-2-one	50464-95-4	123	124	208.146	C13H20O2	1433	0	0	0	1923.35	4023.76	2026.81	5238.47	8947.34	8392.96	18833.4	17245.5	20960.5	21402.1	23991.6	23991.6	30691.7	30691.7	30677.3
348	6-Tetramethyl-cyclopenta[C]pentalen-3(3Ah)-one, octahydro-1,2,3A	120052-69-9	136	121	220.183	C15H24O	1564	0	0	0	9	9	9	62525	74988	168857	200748	198773	179820	278832	359938	359938	498403	498403	717093
349	(E)-5-Isopropyl-8-methylnona-6,8-dien-2-one	54868-48-3	93	136	194.167	C13H22O	1373	0	0	0	6791	3644.9	9123.02	17972.2	20935.4	25953.3	50366	66321.1	79208.7	70537.4	67123.9	67123.9	78712.2	78712.2	68177.9
350	4'-Hydroxyacetophenone	99-93-4	121	136	136.052	C8H8O2	1455	0	0	0	4920.54	6826.47	7160.04	62541.9	76841	114254	121565	139728	140754	162370	175264	175264	171907	171907	215513
351	1,5-Dichloro-6,7-dimethyl-2,4-dioxabicyclo[3.2.0]hept-6-en-3-one	35436-20-5	101	103	207.969	C7H6Cl2O3	1380	0	0	0	9	9	9	9180.69	17013.2	21527.5	16948.7	18863.3	16896.6	20524.6	23357.4	23357.4	26326.9	26326.9	29583.3
352	4-(2,6,6-Trimethyl-2-cyclohexen-1-yl)-2-butanone	31499-72-6	121	136	194.167	C13H22O	1406	0	0	0	9	9	9	29229.4	31897.8	39934.2	50199.5	51973.3	45502	42867.7	48121.5	48121.5	42761.8	42761.8	49882.3
353	Megastigmatrienone	38818-55-2	190	148	190.136	C13H18O	1473	0	0	0	16333	19492.1	19037.4	102459	111026	130794	208707	239093	237660	258958	272392	272392	269234	269234	320913
354	2,4,4-Trimethyl-3-(3-methylbutyl)cyclohex-2-enone	88725-82-0	137	109	208.183	C14H24O	1520	0	0	0	16085	12824	16197	63534	70285	93029	132025	149041	139180	171268	187436	187436	220037	220037	320294
355	1-(p-Anisyl)-3-methyl-1-pentanone	66333-82-2	135	150	206.131	C13H18O2	1552	0	0	0	8367.03	9228	9644.82	61961	59452	64372	62290	83182	81695	80716	88025	88025	70945	70945	98214
356	1-(4-Methoxyphenyl)-4-methylpent-1-en-3-one	103-13-9	161	204	204.115	C13H16O2	1560	0	0	0	7963.67	6709	8196.35	115583	125322	280237	331367	333066	303320	495152	588813	588813	759045	759045	1038942
357	1,2,3,4-Tetrahydro-3-isopropyl-5-methyl-1-oxonaphthalene	29107-42-4	159	202	202.136	C14H18O	1647	0	0	0	55339	51688	61904	170043	179288	260522	297944	313214	286290	377216	375220	375220	389326	389326	373506
358	(E)-4-(3-Hydroxybut-1-en-1-yl)-3,5,5-trimethylcyclohex-2-enone	34318-21-3	108	109	208.146	C13H20O2	1647	0	0	0	20382	18451.8	21159.9	84347	106515	310341	271719	271462	257541	371564	437983	437983	520514	520514	597473
	Hydrocarbons
359	1-Isopropenyl-2,4-dimethyl-1-cyclohexene	56763-60-1	93	150	150.141	C11H18	1108	3.0977e+07	2.92329e+07	2.78585e+07	1.18741e+08	1.27978e+08	1.11768e+08	3.51262e+08	4.25975e+08	4.18068e+08	4.97212e+08	5.18862e+08	5.1514e+08	5.34173e+08	5.51924e+08	5.51924e+08	5.43475e+08	5.43475e+08	5.3724e+08
360	Albene	38451-64-8	95	94	162.141	C12H18	1159	6827155	6471417	6265763	7014028	6500964	6429970	4800529	5924024	5665093	4722772	5254253	4913746	4723079	4989741	4989741	4986884	4986884	4913197
361	5-Methylundecane	1632-70-8	112	57	170.203	C12H26	1156	3.42529e+06	3.12477e+06	2.97107e+06	3.38333e+06	3.23375e+06	3.20414e+06	2.36984e+06	2.95193e+06	2.79374e+06	2.34071e+06	2.61583e+06	2.44146e+06	2.31147e+06	2.43828e+06	2.43828e+06	2.47157e+06	2.47157e+06	2.45398e+06
362	3-Methyl-5-propylnonane	31081-18-2	57	71	184.219	C13H28	1185	3.13709e+06	2.56996e+06	2.36778e+06	3.65707e+06	4.64839e+06	4.25772e+06	3.92255e+06	4.5539e+06	4.81268e+06	3.29723e+06	3.91858e+06	4.09993e+06	4.4366e+06	4.52026e+06	4.52026e+06	4.37835e+06	4.37835e+06	4.27441e+06
363	4-Methyl-2-pyrimidinecarboxylicacid	31295-56-4	57	71	212.25	C15H32	1275	1.58712e+06	1.27808e+06	1.18966e+06	1.541e+06	1.98798e+06	1.87676e+06	1.84605e+06	2.21048e+06	2.41276e+06	1.66063e+06	1.9585e+06	1.99958e+06	2.22072e+06	2.30096e+06	2.30096e+06	2.26734e+06	2.26734e+06	2.25544e+06
364	8,8-Dimethyl-9-methylidenecycloundeca-1,5-diene	62338-54-9	93	41	190.172	C14H22	1485	1.31218e+06	879375	742063	1.09132e+06	713511	860585	2.07398e+06	2.80487e+06	3.56988e+06	4.52304e+06	4.66101e+06	4.58113e+06	5.4305e+06	6.00728e+06	6.00728e+06	6.05606e+06	6.05606e+06	9.286e+06
365	3,5-Dimethylundecane	17312-81-1	57	71	184.219	C13H28	1207	1251300	1006645	935662	1271688	1597677	1519184	1498382	1772069	1870846	1333222	1611944	1695368	1899977	1905130	1905130	1854516	1854516	1845013
366	1-Dodecene	112-41-4	41	55	168.188	C12H24	1190	1093885	941527	874068	1.2368e+06	1.44901e+06	1.33921e+06	1290645	1562115	1609596	1344824	1524121	1519645	1578132	1626144	1626144	1631226	1631226	1645584
367	4,6-Dimethyldodecane	61141-72-8	57	71	198.235	C14H30	1325	879934	697288	625686	920760	1.13717e+06	1.09047e+06	1.13846e+06	1.36966e+06	1.50634e+06	1.01e+06	1.16398e+06	1.19227e+06	1.3493e+06	1.38683e+06	1.38683e+06	1.35219e+06	1.35219e+06	1.36815e+06
368	4-Methyltetradecane	25117-24-2	71	57	212.25	C15H32	1459	731218	552961	492921	723605	885578	865212	894713	1039105	1190399	831257	977188	964096	983364	1.02996e+06	1.02996e+06	1.03024e+06	1.03024e+06	1086504
369	2,3-Dimethyl-hexane	584-94-1	70	71	114.141	C8H18	760	586725	576096	514786	581154	626314	508016	464053	515966	441048	524633	592832	564530	562646	605139	605139	601598	601598	534993
370	Dodecane	112-40-3	57	71	170.203	C12H26	1200	546949	446235	411303	502666	647719	602717	593564	678993	717753	512726	621463	647643	710221	731626	731626	687511	687511	702814
371	2,4-Dimethylheptane'	2213-23-2	85	57	128.157	C9H20	821	526246	453938	436409	561541	704563	722139	850448	648823	611910	494901	571445	701245	814488	750233	750233	737184	737184	743211
372	2-Methyl-6-propyldodecane	55045-08-4	57	71	226.266	C16H34	1483	481027	355493	328202	522187	580238	518643	692473	807076	934738	804481	871100	860661	958945	1.02969e+06	1.02969e+06	1.04814e+06	1.04814e+06	1.20311e+06
373	5-Methyldecane	13151-35-4	57	43	156.188	C11H24	1057	480833	394685	382767	456863	593316	563291	591913	625134	673312	533517	615287	677760	774032	760095	760095	735516	735516	746498
374	6-bis(Methylene)-1,7-Octadiene, 2,7-dimethyl-3	16714-60-6	79	41	162.141	C12H18	1083	424760	403165	380089	913497	1.01696e+06	881218	1.37059e+06	1.83089e+06	1.82349e+06	2.14812e+06	2.33528e+06	2.26106e+06	2.09765e+06	2.37124e+06	2.37124e+06	2.41376e+06	2.41376e+06	2.36645e+06
375	3,5-Dimethyldodecane	107770-99-0	57	71	198.235	C14H30	1285	396080	321231	291246	397526	512619	485401	463574	575835	618758	437530	521793	522925	588239	608529	608529	601155	601155	591567
376	2-Methylundecane	7045-71-8	85	57	170.203	C12H26	1164	344348	260436	222622	732067	631653	591129	1.57397e+06	1.94584e+06	1.91359e+06	1.73203e+06	1.70723e+06	1.61459e+06	1.68529e+06	1.62853e+06	1.62853e+06	1.62856e+06	1.62856e+06	1.90253e+06
377	2,2,4,6,6-Pentamethylheptane	13475-82-6	57	56	170.203	C12H26	990	312920	236439	252561	473872	558396	581171	526621	518471	451587	373037	489751	533772	429173	410053	410053	395733	395733	333735
378	2,3,5-Trimethyldecane	62238-11-3	57	43	184.219	C13H28	1411	308602	249673	200532	368288	436614	432571	446557	517817	564503	425033	492118	500995	536592	566215	566215	553829	553829	565682
379	Tridecane	629-50-5	57	71	184.219	C13H28	1300	302455	248921	210689	367422	450029	414339	456061	540198	588518	440473	498085	521429	579013	587106	587106	580117	580117	565666
380	2,6-Dimethyl-nonane	17302-28-2	113	57	156.188	C11H24	1018	301023	234186	234825	292868	372394	363016	385722	405822	429622	306161	370803	395249	440596	463601	463601	448426	448426	473329
381	2,4-Dimethyl-decane	2801-84-5	57	85	170.203	C12H26	1106	298288	259336	270703	293110	386050	373107	390821	426394	454095	311208	372109	406803	476282	458123	458123	438874	438874	449692
382	2,6,10-Trimethyl-dodecane	3891-98-3	57	71	212.25	C15H32	1366	279760	196807	194944	421447	512063	485910	467852	551655	608287	406447	468369	460276	523814	532274	532274	531548	531548	463433
383	2-Methyl-tridecane	1560-96-9	57	71	198.235	C14H30	1364	262960	191376	178957	411631	496693	459853	458820	535209	595147	391650	447196	448080	509970	516191	516191	524381	524381	457145
384	2-Methylhepta-1,5-diene	41044-64-8	55	95	110.11	C8H14	792	237643	289140	231181	259505	306736	279137	142864	100900	124760	82646.8	80225.3	92266	91109.6	75405.5	75405.5	95252	95252	81899.4
385	1-Octene	111-66-0	55	56	112.125	C8H16	789	233654	265584	262867	295911	317121	250511	106283	113243	107355	69635.6	79584.4	77946.2	92288.8	131188	131188	72461.9	72461.9	85874.7
386	2,6,10-Trimethyltridecane	3891-99-4	57	71	226.266	C16H34	1449	178693	134862	113429	177082	259902	235734	214587	275243	307054	231193	235039	238274	264036	291925	291925	282954	282954	294969
387	6-bis(Methylene)-cyclooctane, 1,5-dimethyl-2	74301-13-6	121	41	164.157	C12H20	1215	149297	128246	118708	227007	276766	253858	202743	274380	303925	221018	220800	234002	223789	244150	244150	247360	247360	252953
388	2,4-Dimethyl-undecane	17312-80-0	85	57	184.219	C13H28	1208	147913	119341	107247	157690	202534	198619	206006	223888	248173	178689	217657	215984	236062	252273	252273	240803	240803	238540
389	2,6-Dimethyl-2-cis-6-octadiene	2792-39-4	69	41	138.141	C10H18	978	136591	100151	96584.4	283583	328138	283395	749588	1.03397e+06	1.00334e+06	972301	1.10275e+06	1.03787e+06	1.03096e+06	1.15374e+06	1.15374e+06	1.20552e+06	1.20552e+06	1.20271e+06
390	2-Methyl-nonane	871-83-0	98	57	142.172	C10H22	964	129299	109422	102373	129053	162626	167295	171625	169302	183002	135073	156103	174268	196835	193457	193457	186399	186399	184817
391	4-Methyl-decane	2847-72-5	112	71	156.188	C11H24	1060	122506	102871	109976	134686	153815	139591	131608	145246	150016	127801	151902	157491	163718	164557	164557	164110	164110	152459
392	(E)-2-Tetradecene	35953-54-9	55	41	196.219	C14H28	1406	117315	85000	74643	236677	290756	277867	358406	418269	480182	452318	519220	509995	584684	624905	624905	601167	601167	679842
393	4,5-Dimethyl-nonane	17302-23-7	71	57	156.188	C11H24	1046	116484	87768	90416.7	109537	136146	130849	143587	157401	154180	120455	132361	156110	176480	169819	169819	181073	181073	160631
394	3-Ethyl-3-methylheptane	17302-01-1	57	71	142.172	C10H22	953	115269	88705.2	79834.4	122836	158052	147507	159723	155324	173547	124325	161738	164000	179671	194456	194456	186538	186538	200980
395	2,5,9-Trimethyl-decane	62108-22-9	57	43	184.219	C13H28	1121	109848	90507	81053	115387	149474	136984	149543	164400	188795	171886	209086	223151	245578	247745	247745	246052	246052	231105
396	3-Methyl-dodecane	17312-57-1	57	71	184.219	C13H28	1271	108686	88572	75419	106777	128204	120432	126729	149785	167118	114032	134024	137352	153632	163975	163975	162541	162541	156662
397	1,1-Dimethyl-3-methylene-2-ethenylcyclohexane	95452-08-7	69	79	150.141	C11H18	1071	106028	89119	75722	151685	171681	141682	143299	189838	202026	177863	187346	190841	189590	206176	206176	189304	189304	286853
398	5-Methyl-5-propylnonane	17312-75-3	71	57	184.219	C13H28	1229	103341	85621	80359	99697	133806	128819	147615	169298	186608	128384	154509	157266	174603	173138	173138	171529	171529	176879
399	Bicyclo(3.3.1)non-2-ene	6671-66-5	80	79	122.11	C9H14	964	99786	100085	109835	118452	106540	100336	77242	106880	91790	74358	82794	69286	71583	76427.7	76427.7	72766	72766	70089
400	4,8-Dimethyl-1,7-nonadiene	62108-28-5	41	69	152.157	C11H20	1026	93598.1	69212	61214.9	72673.5	91628.2	79434.4	92818.1	115281	137318	68060.1	90927.7	99525.4	89848	84085	84085	172562	172562	192023
401	2,9-Dimethylundecane	17301-26-7	57	71	184.219	C13H28	1233	77387.5	63627.7	46781.7	148796	209109	178132	536787	723136	772226	523461	598178	623531	651694	706384	706384	700856	700856	691204
402	1,2,3,4,5-Pentamethylcyclopentadiene	4045-44-7	121	136	136.125	C10H16	983	75354.5	69253.2	62900.3	94003.1	119647	116711	156509	208115	139758	109037	148498	147850	121994	127555	127555	115653	115653	94757.6
403	4-Methyl-pentadecane	2801-87-8	71	43	226.266	C16H34	1556	72747.6	49345.6	48704.2	76643.9	94454.5	102542	67794.4	75390.2	83526.3	59364.3	66030	58554.1	68456.2	77591.3	77591.3	80244	80244	77277.7
404	Nonane	111-84-2	57	85	128.157	C9H20	900	69266.2	51178	49590.4	75316.4	88638	73878	100166	89543.5	109511	72231	77497	97937.9	101638	99661	99661	116693	116693	113601
405	1-Ethylidene-1H-indene	2471-83-2	141	142	142.078	C11H10	1315	64493.5	49463	38669.7	51962	61688.4	49348.9	32934.4	47151.2	44048.5	37167.4	43084.8	36270.4	36711.8	37821.5	37821.5	42814.5	42814.5	99080.2
406	4-Methyl-dodecane	6117-97-1	140	71	184.219	C13H28	1259	62670.4	48627.9	48065.9	64004.4	78609.2	73990.3	67567.5	84379.3	91424.7	65357	81923.6	74875.6	85257.5	97488.1	97488.1	88587	88587	88239.1
407	2,3,3-Trimethyl-octane	62016-30-2	113	57	156.188	C11H24	966	53564.2	49869.4	57395.9	38496.8	44485.5	35318.6	32252.5	31105.6	29262.5	22453.6	25641.6	28503.3	34000.7	31138.2	31138.2	26115	26115	23859.9
408	3,3-Dimethyl-octane	4110-44-5	71	70	142.172	C10H22	932	42065	35304	36260	46261	64937	57829	81410	77863	66649	53959	66664	75926	80947	85122	85122	65691	65691	72806
409	1-Tridecene	2437-56-1	83	55	182.203	C13H26	1292	39322	35583	32654	39645	43959.7	49412.3	46078.8	62604	64330.5	20736	49909.8	50237.9	54111.7	63185	63185	51477.6	51477.6	55153
410	2,6,6-Trimethyl-octane	54166-32-4	71	43	156.188	C11H24	966	38790.3	32061.6	28970.1	46654.4	60526.3	55079.7	50713.7	53975.5	53326.1	42427.9	51865	57365.5	59520.2	64028.7	64028.7	64504.9	64504.9	65953
411	2,6,10,14-Tetramethyl-pentadecane	1921-70-6	57	71	268.313	C19H40	1690	33993.3	25065.1	14419.5	45843.5	37605.6	45386.2	82094.1	80507.9	125250	89894.9	100582	103478	101830	120460	120460	126227	126227	131278
412	5-Methyl-dodecane	17453-93-9	126	57	184.219	C13H28	1255	33868.3	23844.4	23835.2	28810.1	43481.5	39754.6	39386.4	45314	48472.2	37495.1	42594.9	44436.8	46126.7	45280.3	45280.3	47985	47985	46857.6
413	3-Ethyl-3-methyl-decane	17312-66-2	57	85	184.219	C13H28	1229	25347.7	23782.6	14348.2	99802.4	137242	114759	636484	921717	978806	770173	897635	926770	870834	940228	940228	954005	954005	916491
414	7-Oxabicyclo[4.1.0]heptane	286-20-4	83	41	98.073	C6H10O	731	21564.6	19223.6	15709.8	29415	27877.1	20047.3	13446.4	14233.3	14983.4	12820.7	16273.5	10701.1	11202.7	17330.1	17330.1	11055.4	11055.4	9577.51
415	2,4-Dimethyldodecane	6117-99-3	140	85	198.235	C14H30	1285	20026.8	13498	14904	18172	19723	21220.8	20568	27082.6	28136	18935	28403.2	25215	29292.7	28036	28036	30728	30728	27699
416	9-Methyl-1-undecene	74630-41-4	70	55	168.188	C12H24	1152	17097.4	14106.4	14991.7	21603.8	27436.9	24297.9	21731.2	28465.6	37421.4	30630.9	40702.8	38293.2	41712.8	48747	48747	47365.5	47365.5	45248.4
417	3,4-dimethyl-1,5-Cyclooctadiene	21284-05-9	68	67	136.125	C10H16	1046	16848.2	12592	12240.2	36118.5	46403	43291.2	136966	152463	198120	81625	89565	105126	89667	105553	105553	125986	125986	138765
418	4,8-Dimethyl-tridecane	55030-62-1	57	41	212.25	C15H32	1384	16457.3	16195.6	12563.2	49893.3	65231.9	64243.8	109861	139473	155789	163546	186814	173866	178507	190265	190265	192350	192350	192981
419	4,4-Dimethyl-undecane	17312-68-4	85	57	184.219	C13H28	1229	15669.4	15249.7	15633.7	55945.6	69533.1	58885.4	386862	544817	596753	464924	548002	564903	536114	578859	578859	586106	586106	579545
420	Dicyclopentadiene	77-73-6	66	39	132.094	C10H12	1003	11550.9	14875.2	12331.8	1.44654e+06	1.55145e+06	1.37001e+06	3.56948e+06	4.61572e+06	4.35729e+06	3.68635e+06	3.8724e+06	3.98409e+06	4.15997e+06	4.28478e+06	4.28478e+06	4.28864e+06	4.28864e+06	3.96058e+06
421	3,3,5-Trimethyl-heptane	7154-80-5	71	57	142.172	C10H22	908	7542.27	4509.73	4239.9	11415.9	14191.1	10565.6	19451.1	18160.5	18982.5	12638.1	18247.6	14458	14248.1	13226	13226	17070.3	17070.3	11589.8
422	7-Methyl-heptadecane	20959-33-5	57	71	254.297	C18H38	1740	6097.76	4736.58	1531.66	7137.61	5811.5	5839.59	7790.97	13659.5	20661.5	14746.1	15919.2	12817.7	20249.9	16359.5	16359.5	20958.4	20958.4	15343
423	5,8-Diethyl-dodecane	24251-86-3	57	41	226.266	C16H34	1572	4926.5	5412.16	6611.67	11598.4	8784.37	15684.6	161444	183815	231472	283588	294170	277794	346182	368505	368505	378427	378427	386350
424	1,1'-Oxybis-octane	629-82-3	57	71	242.261	C16H34O	1688	4128.03	1747.64	2140.73	6047.65	2379.03	3378.49	8009.36	15207.1	17420.6	9531.89	7957.87	16850.3	15790.5	18676.7	18676.7	20252.1	20252.1	19088.4
425	2,3,6-Trimethyl-decane	62238-12-4	141	57	184.219	C13H28	1121	2988.02	2165.27	3064.29	4470.59	5388.22	3778.53	3548.41	4589.66	6458.69	7587.63	8667.56	10599.4	13977.9	11012.6	11012.6	11864.8	11864.8	11524.1
426	3-Ethyl-2-methyl-hexane	16789-46-1	57	84	128.157	C9H20	845	0	0	0	879417	1.11582e+06	750843	2576024	3.71861e+06	3315810	2737173	2943606	2871827	2777361	2942121	2942121	2951437	2951437	2.95733e+06
427	2,5-Dimethyl-nonane	17302-27-1	57	43	156.188	C11H24	1021	0	0	0	342828	373821	351193	784334	979216	937975	787239	823742	845129	908197	940259	940259	920343	920343	874898
428	4,5,9,10-Dehydro-isolongifolene	156747-45-4	143	157	200.157	C15H20	1380	0	0	0	7201	8176	7037	22633	22231	35802	35810	41278	45910	48801	51591	51591	53305	53305	66646
429	Khusimyl methyl ether	300349-20-6	133	91	234.198	C16H26O	1680	0	0	0	0	0	0	0	0	0	7141	7393.67	8020	9727	6129.13	6129.13	5987.26	5987.26	20094
430	Tetradecyl-oxirane	7320-37-8	41	82	240.245	C16H32O	1676	0	0	0	8208.96	7768	8936	40113	59782	91007	169678	156992	154666	184104	216589	216589	243584	243584	262307
431	(1S,5S)-2-Methyl-5-((R)-6-methylhept-5-en-2-yl)bicyclo[3.1.0]hex-2-ene	159407-35-9	119	93	204.188	C15H24	1394	0	0	0	51432.1	50521.3	44616.7	388548	477131	584000	1.10303e+06	1.15041e+06	1.00088e+06	1.12315e+06	1.24607e+06	1.24607e+06	1.12359e+06	1.12359e+06	1.54934e+06
432	1,E-11,Z-13-Hexadecatriene	80634-97-5	67	82	220.219	C16H28	1618	0	0	0	0	0	0	52763.1	47546.9	15936.8	107464	115874	134614	101568	98285.6	98285.6	51566.6	51566.6	57784.8
433	2-Methyl-hexadecane	1560-92-5	57	71	240.282	C17H36	1664	0	0	0	15965	6567.33	10621.9	13237.8	20992.3	38347.4	42457	36788.4	34053	54677	62606	62606	72676	72676	79075
434	Aplotaxene	10482-53-8	79	67	232.219	C17H28	1664	0	0	0	17144.2	19306.7	25630	133916	196892	264040	447415	450754	410305	564622	632673	632673	686588	686588	809724
435	4',7',7'-Trimethyl-dispiro[1,3-dioxolane-2,2'-bicyclo[2.2.1]heptane-3',2''-(1'',3''-dioxolane)]	24022-14-8	113	99	254.152	C14H22O4	1694	0	0	0	0	0	0	9252	12632	23244	17010	17030	11464	14937	15211	15211	21149	21149	20594
	Terpenoids
436	Linalool	78-70-6	71	93	154.136	C10H18O	1099	28267204	25964723	24129568	99287660	107536126	93043735	287287833	357370007	355420702	420497818	441955285	440802380	452360509	469904502	469904502	470196381	470196381	466975809
437	3-Methyl-4-methylenebicyclo[3.2.1]oct-2-ene	49826-53-1	91	105	134.11	C10H14	1168	9.67741e+06	7.91222e+06	7.01448e+06	2.67268e+08	2.82243e+08	2.49768e+08	6.60323e+08	7.58348e+08	7.32471e+08	7.28174e+08	7.64221e+08	7.40767e+08	7.10158e+08	7.13855e+08	7.13855e+08	7.17592e+08	7.17592e+08	7.25593e+08
438	2,3-Epoxypinane	1686-14-2	67	109	152.12	C10H16O	1095	6.3582e+06	6.13276e+06	5.76259e+06	2.13314e+07	2.27879e+07	1.9825e+07	6.23949e+07	7.76406e+07	7.62266e+07	9.00866e+07	9.61941e+07	9.57584e+07	9.97698e+07	1.03531e+08	1.03531e+08	1.02604e+08	1.02604e+08	1.01358e+08
439	Fenchone	1195-79-5	81	69	152.12	C10H16O	1096	4.86559e+06	4.63018e+06	4.3628e+06	1.54428e+07	1.67034e+07	1.44182e+07	4.83612e+07	6.04358e+07	5.99332e+07	7.1535e+07	7.53663e+07	7.47966e+07	7.78195e+07	8.05261e+07	8.05261e+07	7.98967e+07	7.98967e+07	7.89158e+07
440	Ipsenol	35628-05-8	68	69	154.136	C10H18O	1097	4.4836e+06	4.3045e+06	4.05932e+06	1.43923e+07	1.5409e+07	1.33696e+07	4.20757e+07	5.18411e+07	5.05768e+07	6.07693e+07	6.46174e+07	6.43527e+07	6.61787e+07	6.83301e+07	6.83301e+07	6.75194e+07	6.75194e+07	6.65731e+07
441	7-Methyl-3-methylene-6-octen-1-ol	13066-51-8	69	41	154.136	C10H18O	1195	2240726	2035113	1888700	2267610	2384299	2273637	2029421	2578508	2582056	2254531	2538459	2429204	2356523	2506399	2506399	2564542	2564542	2564971
442	cis-Chrysanthenol	55722-60-6	109	81	152.12	C10H16O	1162	2043078	1618540	1502651	56514690	58881620	52984428	157701298	189731848	185998728	183145545	195409782	188264048	177474898	181878932	181878932	182879724	182879724	184742746
443	4-Acetyl-1,4-dimethyl-1-cyclohexene	43219-68-7	109	67	152.12	C10H16O	1149	1.99395e+06	1.5702e+06	1.45445e+06	5.46609e+07	5.79186e+07	5.21748e+07	1.56937e+08	1.88938e+08	1.85494e+08	1.8251e+08	1.95589e+08	1.88545e+08	1.77455e+08	1.81694e+08	1.81694e+08	1.82408e+08	1.82408e+08	1.84733e+08
444	β-Ionone	14901-07-6	177	91	192.151	C13H20O	1491	1.48472e+06	1.22755e+06	1.0228e+06	2.09426e+06	2.1259e+06	2.21942e+06	2.23596e+06	2.72537e+06	3.48217e+06	2.49288e+06	2.44677e+06	2.22939e+06	2.50252e+06	2.76669e+06	2.76669e+06	2.91764e+06	2.91764e+06	2.91413e+06
445	Thujone	546-80-5	110	81	152.12	C10H16O	1103	1.27481e+06	1.37162e+06	1.30717e+06	2.14181e+06	2.32552e+06	2.00788e+06	5.53623e+06	6.95304e+06	6.74664e+06	8.16205e+06	8.58535e+06	8.49011e+06	8.76546e+06	9.12151e+06	9.12151e+06	8.99917e+06	8.99917e+06	8.9446e+06
446	Isoterpinene	586-62-9	93	121	136.125	C10H16	1088	1.27434e+06	1.08076e+06	967747	2.46364e+06	2.76395e+06	2.28699e+06	3.73878e+06	5.10905e+06	5.26264e+06	6.19145e+06	6.72432e+06	6.41399e+06	6.1084e+06	6.92674e+06	6.92674e+06	7.09269e+06	7.09269e+06	7.07006e+06
447	Limonene	138-86-3	68	93	136.125	C10H16	1026	1.10196e+06	831335	827545	803550	1.0709e+06	1.04757e+06	986524	1.31513e+06	1.60181e+06	715619	890640	961453	1.02824e+06	1.08673e+06	1.08673e+06	1.58078e+06	1.58078e+06	1.58536e+06
448	1-Methyl-4-(1-methylethenyl)-1,2-cyclohexanediol	1946-00-5	71	67	170.131	C10H18O2	1321	1.04276e+06	843335	774083	1.09764e+06	1.36718e+06	1.30985e+06	1.37005e+06	1.62194e+06	1.77695e+06	1.20537e+06	1.39355e+06	1.42296e+06	1.6046e+06	1.65359e+06	1.65359e+06	1.61252e+06	1.61252e+06	1.65732e+06
449	Carvone	99-49-0	82	54	150.104	C10H14O	1242	1.02174e+06	939033	884877	851738	884949	894538	777068	977887	940719	772521	859052	783242	784991	842438	842438	840080	840080	817955
450	Curcumene	644-30-4	119	132	202.172	C15H22	1483	979497	627534	543809	795998	547028	613996	2.36207e+06	3.05113e+06	4.18515e+06	6.89917e+06	7.26647e+06	7.08282e+06	8.4527e+06	9.42427e+06	9.42427e+06	9.62541e+06	9.62541e+06	1.54401e+07
451	Aristolochene	26620-71-3	105	189	204.188	C15H24	1487	968850	622876	541520	907189	704889	765026	3.5523e+06	4.45087e+06	6.10059e+06	1.04449e+07	1.10894e+07	1.08594e+07	1.29475e+07	1.4428e+07	1.4428e+07	1.47079e+07	1.47079e+07	2.36528e+07
452	2-Methylisoborneol	2371-42-8	95	107	168.151	C11H20O	1198	870618	765588	696840	1.14759e+06	1.18425e+06	1.12353e+06	1.5152e+06	1.89231e+06	1.91313e+06	2.18689e+06	2.41543e+06	2.27766e+06	2.33252e+06	2.38945e+06	2.38945e+06	2.43652e+06	2.43652e+06	2.47603e+06
453	Eremophilene	10219-75-7	107	161	204.188	C15H24	1494	811331	392700	248289	15514707	18916073	18194881	189612808	206620225	232687855	277195033	294436611	292725969	318004334	333386423	333386423	325907980	325907980	372665796
454	(3S,3As,5R)-3,8-Dimethyl-5-prop-1-en-2-yl-1,2,3,3A,4,5,6,7-octahydroazulene	3691-11-0	107	93	204.188	C15H24	1505	809735	427966	295561	1.53859e+07	1.87544e+07	1.80872e+07	1.889e+08	2.06012e+08	2.32025e+08	2.7639e+08	2.93048e+08	2.91824e+08	3.16977e+08	3.32308e+08	3.32308e+08	3.26956e+08	3.26956e+08	3.74671e+08
455	cis-Ocimene	3338-55-4	93	41	136.125	C10H16	1038	735990	550392	515627	1.52804e+06	2.00545e+06	1.80588e+06	4.50313e+06	5.85708e+06	5.61749e+06	2.84329e+06	3.4325e+06	3.76305e+06	3.08928e+06	3.14975e+06	3.14975e+06	3.036e+06	3.036e+06	2.92686e+06
456	1-Methyl-4-(1,2,2-trimethylcyclopentyl)cyclohexa-1,3-diene	29621-78-1	119	204	204.188	C15H24	1509	680608	423882	282379	1.76133e+07	2.14466e+07	2.07438e+07	2.18977e+08	2.37864e+08	2.69137e+08	3.21692e+08	3.40455e+08	3.37621e+08	3.68482e+08	3.83931e+08	3.83931e+08	3.78781e+08	3.78781e+08	4.33157e+08
457	1,3,8-P-Menthatriene	18368-95-1	119	91	134.11	C10H14	1119	648991	573173	514108	675955	913849	761042	586929	783289	885963	175681	191772	202575	221829	217280	217280	244307	244307	193790
458	L-α-Terpineol	10482-56-1	59	93	154.136	C10H18O	1190	633285	556155	508308	658277	789064	671560	683607	958833	1.01662e+06	933065	1.07179e+06	972878	978397	1.07085e+06	1.07085e+06	1.115e+06	1.115e+06	1.12288e+06
459	(1α,2β,5α)-2-Methyl-5-(1-methylethenyl)-cyclohexanol	38049-26-2	93	41	154.136	C10H18O	1192	595117	530854	479050	7391989	8108872	6889744	20713502	26043618	26589229	37591527	40896444	38671729	40268851	42435963	42435963	42880600	42880600	43357231
460	P-Menth-8-en-1-ol, stereoisomer	7299-40-3	71	136	154.136	C10H18O	1161	520246	391650	327432	773667	741593	702920	517958	680390	674846	558926	597714	578211	598297	647747	647747	619282	619282	623125
461	P-Menthan-1-ol	3901-93-7	71	98	156.151	C10H20O	1167	499467	403543	330753	750496	715150	683397	467568	621582	632761	508502	542427	511836	549506	593063	593063	571502	571502	574541
462	Levomenthol	2216-51-5	71	81	156.151	C10H20O	1171	489391	392386	357077	531671	652466	582273	660494	785802	806988	684224	785732	787553	829727	864410	864410	847567	847567	858445
463	1-Methyl-4-propan-2-ylidenecyclohexan-1-ol	586-81-2	93	121	154.136	C10H18O	1197	481320	398477	367275	7.19562e+06	8.06715e+06	7.05225e+06	2.04692e+07	2.58745e+07	2.63248e+07	3.73701e+07	4.11277e+07	3.84402e+07	4.00902e+07	4.19158e+07	4.19158e+07	4.28005e+07	4.28005e+07	4.30961e+07
464	3,3,6-Trimethylhepta-1,5-dien-4-one	546-49-6	83	55	152.12	C10H16O	1062	470510	435482	422316	546121	506880	489828	346571	433499	446008	376986	389194	388775	375017	388589	388589	384248	384248	405054
465	Theaspirane	36431-72-8	138	82	194.167	C13H22O	1302	459906	389092	341223	498451	654361	615755	513930	669122	710176	426141	501767	494786	472179	513654	513654	505507	505507	473499
466	β-Selinene	17066-67-0	41	105	204.188	C15H24	1486	423592	292994	239619	378811	290600	313601	638451	845437	1.09108e+06	1.39113e+06	1.41449e+06	1.39741e+06	1.66133e+06	1.82949e+06	1.82949e+06	1.8698e+06	1.8698e+06	2.80766e+06
467	(+)-D-Cadinene	483-76-1	161	134	204.188	C15H24	1524	422444	286414	273206	5.28028e+06	6.43073e+06	6.13486e+06	2.49952e+07	2.76094e+07	3.10907e+07	4.50707e+07	4.92941e+07	4.92921e+07	5.44258e+07	5.64188e+07	5.64188e+07	5.55017e+07	5.55017e+07	6.46148e+07
468	α-Muurolene	10208-80-7	105	161	204.188	C15H24	1499	398570	234941	147348	9.73196e+06	1.18344e+07	1.14185e+07	1.10953e+08	1.21188e+08	1.36333e+08	1.64864e+08	1.76795e+08	1.75169e+08	1.91608e+08	2.00593e+08	2.00593e+08	1.97432e+08	1.97432e+08	2.26628e+08
469	γ-Terpinene	99-85-4	93	91	136.125	C10H16	1060	395216	279127	251550	246265	364979	317807	332929	344653	350510	215437	285337	272197	276758	287977	287977	281674	281674	294483
470	1-Isopropyl-3-methylbenzene	535-77-3	119	134	134.11	C10H14	1022	387244	302513	292178	340581	428391	415256	253716	348984	328401	208181	197375	209213	195548	231189	231189	233517	233517	233105
471	(2Z)-3,7-Dimethylocta-2,6-dienal	106-26-3	41	69	152.12	C10H16O	1240	386647	325306	323474	363542	383851	384135	342834	427161	439988	355974	386678	367637	378366	401174	401174	406115	406115	424207
472	β-Myrcene	123-35-3	41	93	136.125	C10H16	991	359119	278924	301788	349000	398905	407553	680468	827003	494041	380456	438160	502255	422188	418018	418018	373107	373107	368916
473	Isogeraniol	5944-20-7	41	81	154.136	C10H18O	1240	353809	296973	298011	326252	354768	338364	308885	392464	393597	331536	376284	335508	341137	364034	364034	368532	368532	388243
474	α-Farnesene	502-61-4	41	93	204.188	C15H24	1508	335794	222327	154995	5.85657e+06	7.12589e+06	6.79088e+06	6.05642e+07	6.51063e+07	7.27546e+07	8.50338e+07	8.95602e+07	8.90957e+07	9.55014e+07	9.9147e+07	9.9147e+07	9.86747e+07	9.86747e+07	1.09557e+08
475	Pinocamphone	547-60-4	55	69	152.12	C10H16O	1160	319887	275729	228409	492269	467226	427523	425841	500348	505666	476157	527686	494664	397656	509525	509525	520796	520796	534450
476	Citral	5392-40-5	69	41	152.12	C10H16O	1273	311047	244831	224649	288939	362136	348206	350565	411184	435411	328018	366584	390012	413199	430363	430363	446983	446983	413232
477	Trans-Calamenene	73209-42-4	159	160	202.172	C15H22	1529	309126	178322	160160	1.86045e+06	2.23418e+06	2.16787e+06	5.07748e+06	5.45832e+06	5.51993e+06	6.69416e+06	7.67858e+06	7.43262e+06	7.84407e+06	7.75931e+06	7.75931e+06	7.5564e+06	7.5564e+06	7.70362e+06
478	4-Thujanol	17699-16-0	93	43	154.136	C10H18O	1070	304644	245747	208935	383196	402814	329177	336093	483322	534200	491177	534969	508700	495968	552340	552340	628005	628005	992323
479	6-Octen-1-ol, 3,7-dimethyl-, formate	105-85-1	69	41	184.146	C11H20O2	1275	300298	251357	227462	287351	351552	352450	350427	403100	445521	312109	354136	390428	416054	432121	432121	424267	424267	408001
480	Lavandulol	498-16-8	69	41	154.136	C10H18O	1170	289884	263023	256828	364865	403158	369164	350593	459204	426717	415382	469016	448879	473917	545982	545982	514788	514788	513595
481	cis-Dihydrocarvone	3792-53-8	67	95	152.12	C10H16O	1195	286092	252680	223808	374825	369864	399135	533139	693667	683516	809726	890907	832609	824451	899664	899664	890730	890730	902196
482	Cubebol	23445-02-5	161	105	222.198	C15H26O	1515	262438	180057	157300	3.48946e+06	4.20501e+06	4.08029e+06	1.8153e+07	2.02598e+07	2.28465e+07	3.4865e+07	3.92418e+07	3.79086e+07	4.4528e+07	4.73583e+07	4.73583e+07	4.81348e+07	4.81348e+07	5.64492e+07
483	(2S,4Ar,8Ar)-4A,8-Dimethyl-2-(prop-1-en-2-yl)-1,2,3,4,4A,5,6,8A-octahydronaphthalene	123123-37-5	161	122	204.188	C15H24	1517	251644	181092	159248	3499209	4217625	4100496	18221272	20332153	22937378	35015947	39381031	38033863	44723025	47599990	47599990	48384917	48384917	56764078
484	Cadina-3,9-diene	523-47-7	161	189	204.188	C15H24	1518	244943	171577	153017	3.48949e+06	4.20503e+06	4.07743e+06	1.81482e+07	2.02541e+07	2.28402e+07	3.48579e+07	3.92342e+07	3.79015e+07	4.45189e+07	4.735e+07	4.735e+07	4.81251e+07	4.81251e+07	5.64393e+07
485	(1α,4Aβ,8Aα)-1,2,3,4,4A,5,6,8A-Octahydro-7-methyl-4-methylene-1-(1-methylethyl)-naphthalene	39029-41-9	161	105	204.188	C15H24	1513	242724	171577	157300	3.48946e+06	4.20501e+06	4.08029e+06	1.8158e+07	2.02591e+07	2.28256e+07	3.48389e+07	3.92151e+07	3.7884e+07	4.44944e+07	4.73256e+07	4.73256e+07	4.80974e+07	4.80974e+07	5.64081e+07
486	Terpilene	99-86-5	121	93	136.125	C10H16	1012	233360	186137	167139	200942	241014	232021	226262	305133	259176	159966	199779	209560	183797	183023	183023	158775	158775	159284
487	P-Mentha-1,5-dien-8-ol	1686-20-0	59	94	152.12	C10H16O	1167	221150	196987	196094	235620	269904	223248	153893	190653	207031	158344	173569	166093	171393	167498	167498	209015	209015	275687
488	2,6,6-Trimethyl-1,3-cyclohexadiene-1-carboxaldehyde	116-26-7	107	91	150.104	C10H14O	1201	199699	192469	186130	319482	337528	328303	236265	285783	308035	230535	217248	220763	263783	250482	250482	248993	248993	246535
489	3-Carene	13466-78-9	93	91	136.125	C10H16	1006	193559	169771	167774	208533	247134	244907	288234	349586	245182	162286	229442	228451	188576	159244	159650	163190	123166	141495
490	(E)-Bergamotene	15438-94-5	69	93	204.188	C15H24	1492	179870	142853	117852	441371	479584	492960	1.67827e+06	1.84894e+06	1.79984e+06	1.93235e+06	2.18717e+06	2.13961e+06	2.19394e+06	2.20786e+06	2.20786e+06	2.13537e+06	2.13537e+06	2.25933e+06
491	(E)-4,8-Dimethylnona-1,3,7-triene	19945-61-0	69	41	150.141	C11H18	1116	174579	169829	173934	267804	332913	295053	429568	600626	742211	445700	563727	584625	742834	658787	658787	830380	830380	716837
492	2-Isopropyl-5-methyl-9-methylene-bicyclo[4.4.0]dec-1-ene	150320-52-8	161	105	204.188	C15H24	1507	161605	109436	51896	3.70491e+06	4.4442e+06	4.52015e+06	4.02815e+07	3.91367e+07	5.03948e+07	5.67354e+07	6.45475e+07	68273533	6.46704e+07	7.36745e+07	7.36745e+07	6.90399e+07	6.90399e+07	89699761
493	3-Pinanone; 2,6,6-trimethylbicyclo[3.1.1]heptan-3-one	15358-88-0	55	69	152.12	C10H16O	1173	156610	139885	114142	187725	216728	193268	275172	341081	350806	371192	419346	379821	380324	396252	396252	431512	431512	419361
494	(+)-3-Carene	498-15-7	93	91	136.125	C10H16	1010	151025	119760	107809	119578	160511	147227	148769	206671	164815	94261.1	131213	131085	123490	126273	126273	111957	111957	110644
495	P-Menthan-3-one	10458-14-7	112	69	154.136	C10H18O	1169	138623	127793	104080	129328	152306	131996	145978	178735	173411	185947	200639	198262	208031	213961	213961	207992	207992	219333
496	2,6-Dimethyl-2-trans-6-octadiene	2609-23-6	69	41	138.141	C10H18	993	134231	111000	111654	193150	246477	222424	221119	233025	209631	137721	166478	190061	197149	191438	191438	166490	166490	174996
497	1,4-Methanoazulen-3-ol, decahydro-1,5,5,8a-tetramethyl-, [1S-(1α,3β,3aβ,4α,8aβ)]- (9CI)	99481-30-8	85	95	222.198	C15H26O	1593	120003	71717	59072	222339	259294	277869	292182	311236	356158	254194	279650	281192	277850	305199	305199	306295	306295	299309
498	(Z,E)-α-Farnesene	26560-14-5	41	93	204.188	C15H24	1491	116437	82008.1	81139.6	252826	297221	269300	1.00241e+06	1.09921e+06	1.02768e+06	1.11888e+06	1.28303e+06	1.24482e+06	1.2794e+06	1.27871e+06	1.27871e+06	1.2249e+06	1.2249e+06	1.27928e+06
499	Ascaridole	512-85-6	121	136	168.115	C10H16O2	1244	109677	82927	74223	96103	91367	81054	77459	110202	109961	104363	101941	92767	107767	88289	88289	86092	86092	99922
500	(-)-Trans-Isopiperitenol	74410-00-7	84	83	152.12	C10H16O	1210	98055.3	67763.1	68798.3	90613.6	141506	113849	114512	136003	144548	100088	116809	135859	138645	141860	141860	113604	113604	131357
501	Neoisomenthol	491-02-1	71	81	156.151	C10H20O	1187	94660.7	76873.7	62690.3	300646	375735	334077	8.94031e+06	1.26216e+07	1.2774e+07	8.73275e+06	9.91252e+06	1.01043e+07	9.50759e+06	1.01986e+07	1.01986e+07	9.95818e+06	9.95818e+06	9.88608e+06
502	D-Citronellol	1117-61-9	69	41	156.151	C10H20O	1220	79103.8	60537.9	55781.9	77798.2	95160.1	89343.5	96487.3	107443	126606	97775.1	111579	115612	111516	119686	119686	122994	122994	123699
503	Myrtenal	564-94-3	79	107	150.104	C10H14O	1193	77047	66037.9	50327.1	273175	269564	263684	528764	659252	617081	867235	951667	911254	943560	924774	924774	924507	924507	955015
504	[1S-(1α,4α,7α)]-1,2,3,4,5,6,7,8-Octahydro-1,4,9,9-tetramethyl-4,7-methanoazulene	514-51-2	161	189	204.188	C15H24	1381	77021.4	59166.4	55109.1	678765	851729	810870	3.06093e+06	3.49914e+06	3.81244e+06	5.09966e+06	6.10059e+06	5.94877e+06	7.51095e+06	7.79733e+06	7.79733e+06	7.51714e+06	7.51714e+06	8.87114e+06
505	Copaene	3856-25-5	161	119	204.188	C15H24	1376	75522	58645	54808	674727	846456	807456	3059003	3490774	3801927	5088805	6074267	5936032	7485477	7797355	7797355	7341655	7341655	8633932
506	β-Cedrene	546-28-1	161	69	204.188	C15H24	1421	73830.1	54871.1	53399.7	204093	252086	241336	838004	992840	1.08378e+06	1.66663e+06	1.99064e+06	1.96874e+06	2.15333e+06	2.24981e+06	2.24981e+06	2.16182e+06	2.16182e+06	2.98509e+06
507	Myrtenol	515-00-4	79	91	152.12	C10H16O	1195	69972.2	71692.9	58749.2	236627	206754	171014	495118	618187	579530	839168	934518	861141	891473	917829	917829	890605	890605	897556
508	Perillic acid	7694-45-3	68	67	166.099	C10H14O2	1484	62463.4	42601	39906.6	60014.4	46362.1	58457.3	157197	195140	275849	323564	310504	289847	375229	414996	414996	450688	450688	595347
509	Camphene hydrate	465-31-6	71	69	154.136	C10H18O	1148	57574	45922	40462	71357	83600	82982	73185	90789	102682	82314	103214	105056	129447	127294	127294	127215	127215	118362
510	1,4-Dimethyl-7-(prop-1-En-2-Yl)-1,2,3,3A,4,5,6,7-octahydroazulene	22567-17-5	161	81	204.188	C15H24	1473	55283.6	36322.6	32897.7	724715	913582	889034	5.45723e+06	6.74756e+06	8.30172e+06	1.28833e+07	1.54819e+07	1.48805e+07	1.77435e+07	1.93204e+07	1.93204e+07	1.94605e+07	1.94605e+07	2.3146e+07
511	β-Gurjunene	17334-55-3	161	41	204.188	C15H24	1432	54890.3	36186.7	37823	324344	395959	382087	1.63832e+06	2.0141e+06	2.17912e+06	3.3764e+06	4.06686e+06	3.89929e+06	4.50744e+06	4.73615e+06	4.73615e+06	4.69978e+06	4.69978e+06	5.5894e+06
512	Geraniol	106-24-1	69	41	154.136	C10H18O	1255	53892	56409	37871	413421	495832	437989	1163028	1624220	2056104	2197659	2331612	2104303	2288145	2690537	2690537	3035779	3035779	3470168
513	Di-Epi-α-Cedrene-(I)	21996-77-0	119	120	204.188	C15H24	1382	53281	39856	42953	519408	648816	616130	2475904	2935317	3125934	4054982	4767439	4701807	5846812	6090633	6090633	5862568	5862568	6813792
514	(+)-α-Pinene	7785-70-8	93	92	136.125	C10H16	932	52480.9	38927.8	38505.5	52370.7	67126.7	64143.6	50543.1	49568.1	52237.6	32923.4	38585.8	39095.6	54766.4	49142.9	49142.9	47839.9	47839.9	53117.5
515	Cosmene	460-01-5	91	119	134.11	C10H14	1131	46922.6	38527.3	36519	110819	94668.9	103423	80443	104466	88226	97051.5	81790	63359.7	61874.8	70239	70239	81712	81712	94395.1
516	4-(1,5-Dimethyl-1,4-hexadienyl)-1-methyl-cyclohexene	17627-44-0	93	119	204.188	C15H24	1518	45224.6	34778.5	27210.8	518191	671666	670772	2.62192e+06	2.82043e+06	3.26992e+06	4.85745e+06	5.53763e+06	5.38503e+06	6.36059e+06	6.76444e+06	6.76444e+06	6.71789e+06	6.71789e+06	8.15971e+06
517	Neryl 2-methylbutyrate	51117-19-2	69	93	238.193	C15H26O2	1576	44234	20633	17015	224329	258234	239581	1417658	1603512	1967810	3165218	3448472	3299294	3469206	3831210	3831210	3803518	3803518	4406920
518	(Z)-1-Methyl-4-(6-methylhept-5-en-2-ylidene)cyclohex-1-ene	13062-00-5	93	119	204.188	C15H24	1515	43550.8	39407.1	35492.6	535177	644930	661353	2.5599e+06	2.86858e+06	3.23913e+06	4.83374e+06	5.5143e+06	5.33432e+06	6.33011e+06	6.71312e+06	6.71312e+06	6.67474e+06	6.67474e+06	8.15971e+06
519	Epizonarene	41702-63-0	161	204	204.188	C15H24	1501	43207.2	33232.7	24888.5	711021	859770	872281	4.20684e+06	4.63111e+06	4.97253e+06	6.98447e+06	7.83715e+06	7.95928e+06	8.5612e+06	8.97427e+06	8.97427e+06	8.10059e+06	8.10059e+06	9.9834e+06
520	α-Ionone	127-41-3	121	93	192.151	C13H20O	1426	41840.3	29568.1	25035.1	92006.6	112480	105966	334999	396472	448984	655819	782697	790317	830727	873837	873837	885563	885563	1.22687e+06
521	Dendrolasin	23262-34-2	69	81	218.167	C15H22O	1574	41336.8	24322.7	14353.6	208000	241281	241465	1.41708e+06	1.61129e+06	1.98322e+06	3.19537e+06	3.47371e+06	3.33656e+06	3.5226e+06	3.88768e+06	3.88768e+06	3.8563e+06	3.8563e+06	4.46226e+06
522	T-Muurolol	19912-62-0	95	121	222.198	C15H26O	1642	40048	7732	6203	61967	66078	64755	414205	483086	1137595	1413324	1413012	1285122	1798097	2196167	2196167	2758289	2758289	3317822
523	Ipsdienol	35628-00-3	85	41	152.12	C10H16O	1147	38365	31909	27003	46920	55299	53825	56591	61684	66080	54715	71891	73377	88079	87679	87679	84579	84579	79500
524	Dl-Camphoroquinone	10373-78-1	95	69	166.099	C10H14O2	1319	34417	32330	27322	31129	44567	39414	34661	43858	58419	28743	31055	36402.8	35729	40639	40639	46213	46213	47847
525	Diosphenol	490-03-9	126	41	168.115	C10H16O2	1302	32955	25898.8	23419.9	42492.6	49344.8	50292.7	51335.7	61807.8	70540.2	46631.3	56273.9	55660.9	61768.8	64945.9	64945.9	69816.1	69816.1	65169.7
526	β-Cubebene	13744-15-5	161	105	204.188	C15H24	1390	32806.9	29196.8	24015.8	276414	352585	332144	1.82752e+06	2.25388e+06	2.47949e+06	3.84997e+06	4.63397e+06	4.44332e+06	4.98354e+06	5.30827e+06	5.30827e+06	5.03085e+06	5.03085e+06	6.08236e+06
527	Carveol	99-48-9	119	91	152.12	C10H16O	1219	32625	31535	32678	49380	61853	56509	36389	52476	67652	36795	39350.1	41099	45051	59325	59325	76270	76270	74367
528	(-)-Menthone	89-80-5	112	41	154.136	C10H18O	1154	31199.5	24227.9	25156.3	36877.9	42108.1	41652.4	34515.1	43989	47853.1	40548.6	50949.9	50017.2	56001.9	59529.9	59529.9	57507.4	57507.4	57573
529	3-Thujanone	1125-12-8	81	41	152.12	C10H16O	1119	30157	24892.9	18454	30586	34678	29714	71272	87885	106944	79339	96441	96159	105622	122437	122437	121689	121689	124493
530	D-Verbenone	18309-32-5	107	91	150.104	C10H14O	1228	30063	26796	27576	51014	87886	61636.3	76242	103128	82180	81596	82646	79093.9	70971	62238	62238	59503	59503	68678
531	Geranic acid	459-80-3	69	41	168.115	C10H16O2	1355	29291	22415	21737	49572	61627	68139	88738	108007	165418	131045	146885	138056	154670	162978	162978	176467	176467	170271
532	Kessane	3321-66-2	126	108	222.198	C15H26O	1537	28527	20779	15633	30002	33440	32592.9	36046	41521	46184	41691	38427	42376	47127	47940	47940	55042	55042	49759
533	α-Cubebene	17699-14-8	161	105	204.188	C15H24	1351	27606	20300	15955.5	381607	489199	473959	1550421	1745555	1705383	2199958	2707468	2659152	2850058	2821564	2821564	2500215	2500215	2477319
534	3,7(11)-Selinadiene	6813-21-4	161	122	204.188	C15H24	1542	27173.6	17552.1	18412.9	290600	345512	339553	1.62812e+06	1.73922e+06	1.99042e+06	2.97457e+06	3.26032e+06	3.23068e+06	3.62249e+06	3.76955e+06	3.76955e+06	3.71767e+06	3.71767e+06	4.50358e+06
535	(-)-Trans-Pinane	33626-25-4	55	41	138.141	C10H18	972	26546.3	25526	22751.8	32685.9	40805.2	32064.7	34149.7	39933.5	42536.2	25890.7	39109.6	34881.5	44692.8	36305.8	36305.8	35349.7	35349.7	39516.1
536	α-Cadinol	481-34-5	95	121	222.198	C15H26O	1653	25958.2	7112.09	6585.32	54519.3	74574.8	62045.3	434198	510780	1.01545e+06	1.4617e+06	1.45935e+06	1.32528e+06	1.83918e+06	2.23769e+06	2.23769e+06	2.8124e+06	2.8124e+06	2.8724e+06
537	2,6,6-Trimethyl-1-cyclohexene-1-carboxaldehyde	432-25-7	41	137	152.12	C10H16O	1220	25880.6	19155.2	21871.5	31531.6	21372	27041.1	10496.8	28755.6	22515.1	15858.5	22791.2	16179.6	22879.8	18897.7	18897.7	31243.3	31243.3	17242.3
538	Isopinocarveol	6712-79-4	41	55	152.12	C10H16O	1178	24933	22445	17338	59403	80270	69366	1580508	2159913	2212679	1463154	1682478	1725707	1682668	1777954	1777954	1709107	1709107	1703620
539	β-Guaiene	88-84-6	161	105	204.188	C15H24	1490	24838.1	20419.7	15638.5	117464	132315	136261	650749	729345	710549	963225	1.03662e+06	1.0071e+06	1.0782e+06	1.04396e+06	1.04396e+06	994161	994161	1.23788e+06
540	Nerolidol	40716-66-3	69	41	222.198	C15H26O	1564	24434	16439	13550	19223	30826	22497	239343	282376	542240	672479	669737	629605	976814	1158029	1158029	1343417	1343417	1723760
541	(+)-Isopinocampheol	27779-29-9	70	84	154.136	C10H18O	1179	24428.1	24597.5	17014.9	55561.3	63340.2	57421.4	226736	300487	305595	213792	239746	250776	249501	264448	264448	244218	244218	237160
542	Isopulegone	529-00-0	81	67	152.12	C10H16O	1179	23182	24525	17095	53194	70211	51661	1262783	1754193	1805761	1207449	1339916	1395940	1359886	1427115	1427115	1410262	1410262	1398486
543	Bicyclosesquiphellandrene	54324-03-7	161	105	204.188	C15H24	1489	23172.5	15397.9	11754.9	86474.9	108381	110619	567662	612443	569253	817983	900150	863354	911606	909318	909318	864425	864425	969427
544	Sesquiphellandrene	20307-83-9	69	41	204.188	C15H24	1524	23123.3	12115.2	14773.1	152761	184923	179093	618036	681926	761851	1.11672e+06	1.23227e+06	1.32222e+06	1.35682e+06	1.41908e+06	1.41908e+06	1.45874e+06	1.45874e+06	1.60902e+06
545	Cuparene	16982-00-6	132	131	202.172	C15H22	1505	22874	14985	12764.7	182115	203487	213113	2022002	2277213	2487526	3129676	3206642	3248559	3524151	3647908	3647908	3552092	3552092	4120384
546	cis-Calamenene	72937-55-4	159	129	202.172	C15H22	1531	21662	15937.6	16149.7	153322	189903	190661	556464	569361	540643	741356	803308	782883	842134	830564	830564	742614	742614	740193
547	Cedrene	11028-42-5	41	119	204.188	C15H24	1422	21199.7	23416.2	19071.2	56041.6	66592.7	66555.2	204941	230176	263860	403444	481093	479713	509809	536184	536184	526979	526979	758801
548	Cubenene	29837-12-5	119	105	204.188	C15H24	1532	21178.1	13117	13876.1	193721	236737	227779	1.02427e+06	1.14652e+06	1.27765e+06	1.86927e+06	2.14554e+06	2.05051e+06	2.32268e+06	2.43037e+06	2.43037e+06	2.35311e+06	2.35311e+06	2.61522e+06
549	(E)-β-Famesene	18794-84-8	41	69	204.188	C15H24	1457	20510.2	18495.9	13963.3	29645	40775.6	37477.9	161250	178970	199194	330378	433934	396583	433505	446211	446211	454998	454998	659636
550	Chrysanthenone	473-06-3	107	91	150.104	C10H14O	1123	19950	17236	12542	59501	77281.5	86523	68904	61264	73566	92481.5	126759	102131	166119	135493	135493	123830	123830	143268
551	7-Octylidenebicyclo[4.1.0]heptane	82253-11-0	135	93	206.203	C15H26	1522	19864.2	16686.2	15391.5	256809	310174	294210	1.24981e+06	1.37514e+06	1.54872e+06	2.25002e+06	2.46728e+06	2.44529e+06	2.69564e+06	2.79837e+06	2.79837e+06	2.73644e+06	2.73644e+06	3.21303e+06
552	Citronellol	106-22-9	69	41	156.151	C10H20O	1228	19747.1	23944.6	18010.4	27758.4	34238.2	31046.8	42071.2	60238.3	84985.7	45794.4	53435.3	52913.3	55185.4	57714.4	57714.4	81347.2	81347.2	71552.4
553	2-Methyl-6-methylideneocta-1,7-diene	1686-30-2	68	79	136.125	C10H16	984	19499.8	19983.8	22221.3	131429	133834	121567	343656	472698	469751	439293	517597	479635	493753	529627	529627	566548	566548	555460
554	β-Acorenol	28400-11-5	119	93	222.198	C15H26O	1649	19383.7	13511	8398	96580	98016.5	101763	578969	607787	950293	1416464	1527578	1392473	1742651	1929177	1929177	2002762	2002762	2120738
555	Citronellal	106-23-0	154	95	154.136	C10H18O	1153	18930.7	16798.9	16755	28386.6	31413.2	31119.1	38428.9	36128.2	46336.3	39234.7	48801.7	48141.8	55410.4	54245.6	54245.6	57712.4	57712.4	53531.8
556	Hinokitiol	499-44-5	121	164	164.084	C10H12O2	1520	18266	16217.2	11284.9	162030	193825	189844	848901	951069	1.11441e+06	1.69312e+06	1.91308e+06	1.8274e+06	2.18341e+06	2.31645e+06	2.31645e+06	2.41957e+06	2.41957e+06	2.92172e+06
557	(+)-Neodihydrocarveol	18675-33-7	41	93	154.136	C10H18O	1226	18241.5	15722	13169	45331	54912	52179.2	200706	282490	293953	225910	266410	268915	248812	276579	276579	276382	276382	291627
558	(4R,4As,6S)-4,4A-Dimethyl-6-(prop-1-en-2-yl)-1,2,3,4,4A,5,6,7-octahydronaphthalene	823810-22-6	105	91	204.188	C15H24	1476	17105.4	12377.8	14241.1	294803	359919	353645	2.5995e+06	2.98543e+06	3.72552e+06	5.25129e+06	5.92973e+06	5.8241e+06	6.48705e+06	6.94807e+06	6.94807e+06	6.56246e+06	6.56246e+06	8.05324e+06
559	cis-p-Menthan-1-ol	3901-95-9	71	98	156.151	C10H20O	1138	16835.2	14649.3	10992.8	39366.9	51921.5	47412.4	111152	173163	185676	137072	158970	150143	160502	167340	167340	186235	186235	166346
560	Acoradiene	24048-44-0	119	121	204.188	C15H24	1471	16765.8	7810.02	8506.85	110333	137759	133251	747595	935197	1.19827e+06	1.77538e+06	2.14032e+06	2.06096e+06	2.46058e+06	2.53201e+06	2.53201e+06	2.67638e+06	2.67638e+06	3.20533e+06
561	1,3,3-Trimethyl-2-oxabicyclo[2.2.2]octan-6-one	107598-08-3	82	43	168.115	C10H16O2	1217	15254	15090	10825	14394	19068	16997	16371	16747	17168	15047	19404	17900	20181	20389	20389	16271	16271	21324
562	(+)-α-Cadinene	24406-05-1	105	161	204.188	C15H24	1538	13815.3	12846.5	10219.8	120722	150749	157291	712942	799625	858703	1.26107e+06	1.50185e+06	1.38803e+06	1.62578e+06	1.72462e+06	1.72462e+06	1.66714e+06	1.66714e+06	1.91448e+06
563	(-)-Germacrene-D	317819-80-0	161	91	204.188	C15H24	1448	13398.7	10270.7	8352.39	181333	231647	228219	1.20185e+06	1.57269e+06	1.82279e+06	2.42629e+06	2.92726e+06	2.92282e+06	3.29148e+06	3.65142e+06	3.65142e+06	3.62193e+06	3.62193e+06	4.38418e+06
564	4A,8-Dimethyl-2-(Prop-1-En-2-Yl)-1,2,3,4,4A,5,6,7-octahydronaphthalene	103827-22-1	189	133	204.188	C15H24	1492	13230.3	6061.7	7978.93	86072.4	98555.7	90459.6	428930	463665	466411	639228	722444	711353	754105	740303	740303	731346	731346	787418
565	Amorphadiene	92692-39-2	119	121	204.188	C15H24	1458	11992.3	8886.17	6122.24	33548.4	39320.5	38842	274844	341122	385754	641240	733618	743932	812978	861966	861966	842796	842796	1.17189e+06
566	(-)-α-Gurjunene	489-40-7	204	161	204.188	C15H24	1409	10607	9548	6771	31564	40027	38284	135598	142048	149443	233005	265991	294226	327224	307335	307335	325320	325320	419750
567	Valerena-4,7(11)-diene	351222-66-7	105	204	204.188	C15H24	1460	10548.6	10990.1	8921.52	43383.1	48278.2	48198.1	301265	371527	431764	750257	866330	854108	921545	976644	976644	949548	949548	1.34402e+06
568	(-)-Trans-Pinocarveol	547-61-5	92	55	152.12	C10H16O	1139	10460.2	5156.09	6258.98	8654.43	18142.6	11333.3	9059.82	12253.1	13780.4	17163.7	10424.9	15314.9	12490	11915.8	11915.8	22455	22455	19199.8
569	1,4-Cineole	470-67-7	154	111	154.136	C10H18O	1018	10269.8	8937.65	8459.02	7745.24	7816.28	8703.45	7943.19	8718.98	7649.27	6964.34	8660.09	11287.9	8536.72	10673.6	10673.6	7161.68	7161.68	8653.41
570	α-Irone	79-69-6	121	93	206.167	C14H22O	1526	9014	7981	8245	143601	164556	152742	498077	658273	614381	865802	964109	955550	1063334	1084246	1084246	1059638	1059638	1234763
571	ε-Muurolene	30021-46-6	81	41	204.188	C15H24	1459	8730.37	7689.76	4516.15	25471.4	28217.9	24036.3	166483	184930	223005	369254	423680	434493	469146	488571	488571	480792	480792	676211
572	A-Muuroladiene	31983-22-9	105	161	204.188	C15H24	1496	8679.73	4498.92	8090.66	239674	240832	229144	1.66841e+06	1.85405e+06	2.28366e+06	3.7091e+06	4.05565e+06	3.93212e+06	4.70594e+06	5.11678e+06	5.11678e+06	5.11486e+06	5.11486e+06	5.90032e+06
573	Selina-4(15),7(11)-diene	515-17-3	189	133	204.188	C15H24	1479	7878.42	5466.17	3274.76	81761.6	107075	103293	573979	673181	769194	1.19802e+06	1.36015e+06	1.35592e+06	1.50996e+06	1.60432e+06	1.60432e+06	1.57466e+06	1.57466e+06	1.83532e+06
574	Sabinen	3387-41-5	93	91	136.125	C10H16	972	7549.28	5953.93	5244.22	4378.87	7620.51	8481.28	8180.62	9790.57	8211.01	5992.9	7348.26	8795.71	13842.1	16897.6	16897.6	12939.1	12939.1	23925.8
575	Trans-4-(Isopropyl)-1-methylcyclohex-2-en-1-ol	29803-81-4	139	93	154.136	C10H18O	1140	7476.74	6194.89	6580.81	5409.82	7831.93	5076.72	5388.09	6268.21	10831	7528.95	10749.9	7137.24	6565.9	10755.1	10755.1	10091.9	10091.9	13625
576	(-)-Aristolene	6831-16-9	105	161	204.188	C15H24	1447	7446.55	5195.58	6757.57	66689.5	90961.6	80684.6	467055	556797	683066	917346	1.07373e+06	1.10365e+06	1.22232e+06	1.3384e+06	1.3384e+06	1.31957e+06	1.31957e+06	1.55999e+06
577	Eucalyptol	470-82-6	154	81	154.136	C10H18O	1030	6631	7950	8434	19084	20285	17896	11103	18369	11622	16556	16459.8	14286	13149	16703.4	16703.4	11192	11192	10990
578	1R,4R,7R,11R-1,3,4,7-Tetramethyltricyclo[5.3.1.0(4,11)]undec-2-ene	137235-59-7	175	189	204.188	C15H24	1416	6615.54	5054.65	4228.31	8974.51	11235.8	10521.6	16752.4	21871.3	31334.7	35163.7	33111.7	38474.2	37802.5	39058.9	39058.9	45711.6	45711.6	65690.1
579	Farnesal	19317-11-4	69	41	220.183	C15H24O	1656	6424.27	4395.01	1785.96	5283.29	5738.56	5882.51	16250.9	23767	30712.7	49543.4	42040.5	43286.5	55178.7	72141.3	72141.3	67855.3	67855.3	70000.3
580	(1R,3As,8As)-7-Isopropyl-1,4-dimethyl-1,2,3,3A,6,8A-hexahydroazulene	36577-33-0	105	119	204.188	C15H24	1440	6020.55	4776.62	6964.14	58299.6	79917.9	74903.9	443886	545470	711701	595524	645956	614877	640438	700241	700241	676452	676452	756790
581	(+)-Sativene	3650-28-0	108	41	204.188	C15H24	1396	5774.95	4664.12	4800.28	93692.7	112688	101446	501668	570974	717955	950274	1.08088e+06	899588	1.21601e+06	1.32797e+06	1.32797e+06	1.17694e+06	1.17694e+06	1.74174e+06
582	Trans-α-Bergamotene	13474-59-4	119	93	204.188	C15H24	1435	5342.13	9432.74	7416.92	54741.5	78199.1	66574.9	312558	375080	407079	560270	674102	684277	769164	798266	798266	802183	802183	921536
583	α-Bergamotene	17699-05-7	93	41	204.188	C15H24	1435	4991.94	4559.76	3119.61	38464.7	47517	48041.3	162128	193698	218547	327180	387153	376733	430516	450458	450458	439063	439063	536333
584	Iridomyrmecin	485-43-8	95	109	168.115	C10H16O2	1463	4869.25	4851.18	4504.8	19812.7	20467.5	18975	95660	114918	134572	222170	258039	251402	288667	331712	331712	332196	332196	390647
585	(1S,4S,4As)-1-Isopropyl-4,7-dimethyl-1,2,3,4,4A,5-hexahydronaphthalene	267665-20-3	161	105	204.188	C15H24	1458	4768.85	5116.95	4216.68	22277.5	24548.8	22977.7	159217	199337	224894	402183	460391	450044	484827	520297	520297	512929	512929	710072
586	α-Calacorene	21391-99-1	157	142	200.157	C15H20	1542	4394.32	5344.71	4495.42	20586.5	27997.6	25511.5	55401.7	48155	57683.5	64041.5	61172.8	67125.9	69904.6	65799.4	65799.4	65207.8	65207.8	67873.5
587	α-Dehydro-ar-himachalene	78204-62-3	157	185	200.157	C15H20	1516	4151	5747	3862.08	24471	30527	25033	65478	68275	74543	95401	106599	97953	113669	116722	116722	127141	127141	124497
588	(+)-Shyobunone	21698-44-2	150	69	220.183	C15H24O	1503	3969.42	4426.77	4584.63	68470.6	83608.7	83864.8	888013	982679	1.11982e+06	1.3627e+06	1.46015e+06	1.44592e+06	1.58426e+06	1.66608e+06	1.66608e+06	1.64932e+06	1.64932e+06	1.91454e+06
589	(2R,8R,8As)-8,8A-Dimethyl-2-(prop-1-en-2-yl)-1,2,3,7,8,8A-hexahydronaphthalene	5090-61-9	119	161	202.172	C15H22	1456	3856.94	4033.76	4024.34	80488.3	93491.9	104842	564820	718153	838884	1.03677e+06	1.22169e+06	1.25051e+06	1.36751e+06	1.44802e+06	1.44802e+06	1.34708e+06	1.34708e+06	1.52678e+06
590	Cadina-1(10),6,8-triene	1460-96-4	187	159	202.172	C15H22	1528	1781.37	1804.33	4445.63	22202.8	26808.8	27971.2	75762.8	76707.4	73414.3	117185	121145	122437	125081	129973	129973	124421	124421	135392
591	Petasitene	443124-67-2	137	121	204.188	C15H24	1402	1367	1455	3106	2186.35	2920	2327.19	9601.23	10840.9	13001.1	11234	8986	8795	15716	23153	23153	15791	15791	18239
592	(1R,1Ar,2As,5R,6R,6As,7As)-1,6,6A-Trimethyldecahydro-1,2A-methanocyclopropa[B]naphthalen-5-ol	860769-47-7	118	105	220.183	C15H24O	1431	1344	1421	1700	2649	10119	6798	22113	33529	30292	46584	49063	44102	57259	60207	60207	57651	57651	73059
593	Dihydromyrcenol	18479-58-8	59	41	156.151	C10H20O	1064	0	0	0	9198.78	10817.5	7412.03	15022	19133.1	20686.4	20610.2	25309.2	21059.6	22551.5	22798.3	22798.3	23585.9	23585.9	22522.2
594	β-Pinene	127-91-3	93	41	136.125	C10H16	981	0	0	0	113449	123787	99175.4	413920	563283	576275	576369	610440	603055	646534	670393	670393	735194	735194	775821
595	(1S,4S,4As,8Ar)-1-Isopropyl-4,7-dimethyl-1,2,3,4,4A,5,6,8A-octahydronaphthalen-4A-ol	73365-77-2	119	161	222.198	C15H26O	1614	0	0	0	23515	29135	33008	215783	257275	320271	447910	453943	407980	592667	658126	658126	683935	683935	688930
596	Ar-himachalene	19419-67-1	187	145	202.172	C15H22	1542	0	0	0	3529.86	4101.72	3949	14952.3	9249.84	14050	20576.4	17658.8	18193	23351.8	19080	19080	21152	21152	24207
597	Thymol acetate	528-79-0	135	150	192.115	C12H16O2	1355	0	0	0	0	0	0	49731	44468	116437	174250	149078	131356	166037	170119	170119	226093	226093	250259
598	(1R,2R,4S,6S,7S,8S)-8-Isopropyl-1-methyl-3-methylenetricyclo[4.4.0.02,7]decan-4-ol	124753-76-0	159	118	220.183	C15H24O	1586	0	0	0	0	0	0	485151	580415	707576	732212	885348	833727	957552	938995	938995	899444	899444	1.01033e+06
599	Dauca-4(11),8-diene	395070-76-5	136	121	204.188	C15H24	1532	0	0	0	24775	21925	20898	71953	88364	107039	142217	160988	154928	169480	183285	183285	180202	180202	210852
600	Eudesm-3-en-11-ol	473-16-5	59	149	222.198	C15H26O	1653	0	0	0	0	0	0	7795.03	10089.1	43789	26886	20358	19365	43580.7	47292.3	47292.3	60000.2	60000.2	65173
601	Sabinyl acetate	3536-54-7	92	91	194.131	C12H18O2	1292	0	0	0	45209.6	46946.6	53365.5	586081	652416	838057	1.14479e+06	1.18719e+06	1.0937e+06	1.40186e+06	1.40026e+06	1.40026e+06	1.35689e+06	1.35689e+06	1.35059e+06
602	(3R,3Ar,7S,8As)-3,6,8,8-Tetramethyl-4,7,8,8A-tetrahydro-1H-3A,7-methanoazulen-2(3H)-one	288249-25-2	121	93	218.167	C15H22O	1640	0	0	0	8977	8894.91	8386.74	31873	32043	43406	65381	65154	62606	79068	91802	91802	102413	102413	130732
603	Cubenol	21284-22-0	119	41	222.198	C15H26O	1642	0	0	0	26989	31993	34751	180631	195674	297395	467820	475831	437600	553124	627817	627817	673296	673296	785664
604	Trans-Nerolidol	7212-44-4	41	69	222.198	C15H26O	1563	0	0	0	0	0	0	153900	172390	259866	361044	378946	326095	499767	555288	555288	647142	647142	756961
605	1,2,3,4,4a,5,8,9,12,12a-Decahydro-1,4-methanobenzocyclodecene	74708-73-9	79	91	202.172	C15H22	1567	0	0	0	0	0	0	5025415	5418718	6970177	10133332	10651098	9905835	12326994	13333441	13333441	13859448	13859448	14523365
606	(3S,3Ar,6R,8As)-3,7,7-Trimethyl-8-methylenehexahydro-1H-3A,6-methanoazulen-2(3H)-one	28624-27-3	94	79	218.167	C15H22O	1669	0	0	0	21629.1	17672.6	22207.1	157463	185547	266323	444945	437199	386163	511111	589819	589819	702565	702565	849326
607	6,7-Dimethyl-1,2,3,5,8,8A-hexahydronaphthalene	107914-92-1	105	119	162.141	C12H18	1273	0	0	0	18625.6	19848.5	15509.7	37893	33491.9	38318.3	30192.5	28289.1	26371.4	20667.3	41921.6	41921.6	38157.6	38157.6	39982.4
608	Carotol	465-28-1	161	204	222.198	C15H26O	1594	0	0	0	0	0	0	8347	11608	13988	23267	19331	17199	33803	36165	36165	55576	55576	101802
609	(+)-Isoitalicene	94482-89-0	119	121	204.188	C15H24	1395	0	0	0	81497	86173	81720	460091	533223	610160	963578	1093869	1040951	1269027	1369062	1369062	1352958	1352958	1722204
610	Prezizaene	31145-21-8	133	91	204.188	C15H24	1444	0	0	0	6071.83	6300.48	8609.9	50327.7	68267.3	112232	134246	153896	143695	166239	197299	197299	222699	222699	277371
611	Dihydrocurcumene	1461-02-5	119	120	204.188	C15H24	1449	0	0	0	41719.8	55040	61322.7	319247	402489	445778	601682	742974	753051	801784	874681	874681	904320	904320	1.11252e+06
612	(1R,3As,8As)-1,4,4,6-Tetramethyl-1,2,3,3A,4,5,7,8-octahydrocyclopenta[C]pentalene	871660-96-7	189	133	204.188	C15H24	1338	0	0	0	1354.61	1129.78	1747.88	5136.48	4959.58	7279.8	11748.4	14309.8	15958.5	18014.6	17332.8	17332.8	15765.3	15765.3	30543.9
613	Piperitenone	491-09-8	107	150	150.104	C10H14O	1340	0	0	0	152349	179805	179511	1.25617e+06	1.4124e+06	1.57872e+06	1.99935e+06	2.03391e+06	1.87688e+06	2.07591e+06	2.24121e+06	2.24121e+06	2.27209e+06	2.27209e+06	2.3253e+06
614	Geranyl acetate	105-87-3	69	41	196.146	C12H20O2	1382	0	0	0	0	0	0	3.42078e+06	4.30807e+06	4.94848e+06	4.19724e+06	4.71762e+06	4.58903e+06	5.10588e+06	5.15459e+06	5.15459e+06	5.21741e+06	5.21741e+06	5.55709e+06
615	1,1,7,7A-Tetramethyl-1A,2,6,7,7A,7B-hexahydro-1H-cyclopropa[A]naphthalene	154098-14-3	159	117	202.172	C15H22	1440	0	0	0	0	0	0	9078	12343	10979	14370	18710	16950	17657	14599	14599	15098	15098	21910
616	8,9-Dehydro-neoisolongifolene	67517-14-0	131	202	202.172	C15H22	1398	0	0	0	2999	3007	3936	65272.9	52444	91330	102608	102050	101847	130220	136648	136648	166192	166192	185410
617	2-Methylene-4,8,8-trimethyl-4-vinylbicyclo[5.2.0]nonane	242794-76-9	93	133	204.188	C15H24	1407	0	0	0	13495.4	13676.4	12139.8	81069.3	85533	111278	122863	115067	107426	106613	121301	121301	123196	123196	119700
618	Eudesma-2,4,11-triene	82462-31-5	131	119	202.172	C15H22	1479	0	0	0	12312	23283.3	19305.8	113092	148604	144405	256839	302994	280487	269870	318326	318326	318188	318188	371921
619	(5R,10R)-10-Methyl-6-methylene-2-(propan-2-ylidene)spiro[4.5]dec-7-ene	28908-27-2	134	91	202.172	C15H22	1495	0	0	0	58322.3	64767.1	65504.2	261857	288232	275458	341939	393476	380221	406442	419654	419654	386955	386955	419397
620	(2R,3R,6S)-6-Isopropyl-3-methyl-2-(prop-1-en-2-yl)-3-vinylcyclohexanone	39020-72-9	150	151	220.183	C15H24O	1498	0	0	0	4492.81	1830.61	3424.02	17503.4	19546.4	29276.1	56427	54643.3	50360.3	72535.4	70323.4	70323.4	63678.2	63678.2	76055.3
621	E-Farnesene epoxide	83637-40-5	41	119	220.183	C15H24O	1624	0	0	0	0	0	0	46130	63749	56278	54105	74464	65331	65520	99071	99071	106782	106782	113458
622	D-Nerolidol	142-50-7	69	41	222.198	C15H26O	1544	0	0	0	12030.1	15023.8	14635.4	62646.9	66937.1	77845.3	113143	124758	122537	142003	138769	138769	142123	142123	164137
623	Palustrol	5986-49-2	41	55	222.198	C15H26O	1568	0	0	0	0	0	0	5.80929e+06	6.2694e+06	7.82041e+06	1.09258e+07	1.1501e+07	1.09461e+07	1.327e+07	1.41078e+07	1.41078e+07	1.4545e+07	1.4545e+07	1.51447e+07
624	(3E,7E)-1,5,5,8-Tetramethylcycloundeca-3,7-dienol	28446-26-6	82	83	222.198	C15H26O	1614	0	0	0	0	0	0	41300.4	55461.7	45435.4	65835.9	88269.3	65001.6	67342.5	85331.8	85331.8	96777.9	96777.9	113268
625	8,9-Epoxyacorenon-B	61050-91-7	123	109	236.178	C15H24O2	1626	0	0	0	0	0	0	23658.7	22323	35698	43455	48333	37849	65620.6	61656.9	61656.9	85599	85599	107832
626	Bulnesol	22451-73-6	135	59	222.198	C15H26O	1667	0	0	0	13289	10033.7	10001.2	80987	94566	146988	220080	219447	215754	287631	303381	303381	348857	348857	395075
627	Citronellyl tiglate	24717-85-9	81	83	238.193	C15H26O2	1658	0	0	0	51071.2	30597.7	34924.5	237893	272545	385910	643732	645743	602102	753087	847635	847635	939872	939872	1.06616e+06
628	Neointermedeol	5945-72-2	81	135	222.198	C15H26O	1660	0	0	0	24659	28372	30678	186131	252332	361599	586709	660031	548564	682579	792796	792796	875335	875335	1014271
629	β-Bisabolol	15352-77-9	82	93	222.198	C15H26O	1671	0	0	0	0	0	0	33520	40380.9	58200	108867	125064	117008	102489	135793	135793	152210	152210	155837
630	Bergamotenol	88034-74-6	93	119	220.183	C15H24O	1700	0	0	0	1795	2747	1622	12676.3	15448.5	29831	23403	23503	29468.3	39034.1	36904.1	36904.1	37982	37982	32060
631	4,8-Methanoazulen-9-Ol, decahydro-2,2,4,8-tetramethyl-, stereoisomer	4586-22-5	109	135	222.198	C15H26O	1566	0	0	0	4506	3010	6323	24551	29558	37429	45692	51963	50151	36503	64876	64876	59717	59717	64351
632	Epi-Eudesmol	15051-81-7	189	204	222.198	C15H26O	1619	0	0	0	3349.07	4337	2569.08	21420	24407	26146.5	31481	45656	38449.4	49584	57106	57106	51667	51667	71502
	Acid
633	Benzeneacetic acid	103-82-2	91	136	136.052	C8H8O2	1262	1.55695e+06	1.29916e+06	1.16344e+06	1.46622e+06	1.78801e+06	1.67284e+06	1.99257e+06	2.42773e+06	2.52037e+06	2.08847e+06	2.36545e+06	2.14083e+06	2.32843e+06	2.38254e+06	2.38254e+06	2.34049e+06	2.34049e+06	2.304e+06
634	Undecylenic acid	112-38-9	55	41	184.146	C11H20O2	1484	316584	214924	193509	286261	228344	251292	500894	657952	840195	1.18185e+06	1.22132e+06	1.21269e+06	1.45714e+06	1.60369e+06	1.60369e+06	1.6273e+06	1.6273e+06	2.52741e+06
635	2-Heptenoic acid	18999-28-5	41	73	128.084	C7H12O2	1081	201632	183112	173011	480324	526145	444765	673279	903317	923782	1.07955e+06	1.18459e+06	1.1217e+06	1.1358e+06	1.21724e+06	1.21724e+06	1.21334e+06	1.21334e+06	1.21506e+06
636	1-Methylcyclohexylcarboxylic acid	1123-25-7	55	97	142.099	C8H14O2	1210	144450	103951	104368	150230	181400	176926	165368	190686	203246	146006	182695	190296	201062	202151	202151	205912	205912	199382
637	Benzoic acid	65-85-0	105	122	122.037	C7H6O2	1177	136450	116039	101945	1.51627e+06	1.57279e+06	1.44363e+06	7.73247e+06	9.67357e+06	9.33766e+06	1.1317e+07	1.23515e+07	1.18152e+07	1.52949e+07	1.59349e+07	1.59349e+07	1.57614e+07	1.57614e+07	1.84385e+07
638	P-Hydroxybenzoic acid	99-96-7	121	138	138.032	C7H6O3	1502	133275	86041.1	56775.3	3.43653e+06	4.24856e+06	4.09873e+06	4.31567e+07	4.74362e+07	5.18024e+07	6.19503e+07	6.58835e+07	6.52769e+07	7.19478e+07	7.5005e+07	7.5005e+07	7.41231e+07	7.41231e+07	8.55024e+07
639	2-Methylpentanoic acid	97-61-0	74	43	116.084	C6H12O2	959	104570	101564	93058	180487	196856	177153	164698	217600	200632	169742	181140	171133	163677	170067	170067	168631	168631	171963
640	Heptanoic acid	111-14-8	60	73	130.099	C7H14O2	1080	59678.5	55427.2	47885.5	148008	162637	132339	234688	304455	320790	383936	426049	396762	392909	424198	424198	425984	425984	423810
641	9-Oxononanoic acid	2553-17-5	73	55	172.11	C9H16O3	1483	51081	34646	31141	35896	25729	27823	42710	55598	66649	48204	45340	45786	51412	53515	53515	57732	57732	55571
642	Trans-2-Methyl-2-pentenoic acid	3142-72-1	41	69	114.068	C6H10O2	974	44885.8	34406	31949	46635	68103	62910	75485.8	82176.8	84923	80349.5	86639	94137.2	105497	96518	96518	111965	111965	129226
643	2,2-Dimethylpent-3-enoic acid	16642-52-7	83	55	128.084	C7H12O2	997	41925	37148	36709	44787	64660	51993	49525	51421	61793	39605	50990	55488	64599	67400	67400	58730	58730	55691
644	1-Acetyl-L-proline	68-95-1	70	113	157.074	C7H11NO3	1366	39800.4	29391.1	36209.7	62690.9	73145.2	68012	63212.1	75107.7	66167.3	46562.1	56504.9	56233.6	65595	59357.4	59357.4	58384.3	58384.3	45913.9
645	2-Methyl-butanoic acid	116-53-0	74	57	102.068	C5H10O2	861	23691.8	17324	22792.1	23631	30527	25566	21383.5	28083	30940	20011.9	16881	15117	20550	27567	27567	21541.2	21541.2	28714.7
646	P-Tolylacetic acid	622-47-9	105	150	150.068	C9H10O2	1363	19825.3	15511.4	13821	28185	27337	28285.8	154070	157920	356754	480509	464201	396783	502699	588320	588320	679491	679491	746932
647	(2E)-2-(Acetylhydrazono)propanoic acid	64096-81-7	99	57	144.053	C5H8N2O3	1468	18450	13041	13495.4	23663	26099	26490	31081	35459	35189	37593	34661	39248	35956	45728	45728	39271	39271	45213
648	3,7-Dimethyl-6-octenoic acid	502-47-6	69	41	170.131	C10H18O2	1314	13032.7	14190.7	8306.73	18456.9	22358.2	20094	20032.9	25406.5	22577.9	16563.5	31268.3	21548.8	23671.5	23892	23892	20415.8	20415.8	17192.4
649	2-Methyl-propanoic acid	79-31-2	88	41	88.052	C4H8O2	765	12505.5	12314	11601	4.85024e+06	5.91099e+06	5.02797e+06	80928	91435.3	83731	25322	25840	29922	41168	45310	45310	43978	43978	28701
650	3-Phenyl-2-propenoic acid	621-82-9	147	148	148.052	C9H8O2	1435	7140.81	4073.68	4940.67	22558	25173	28282.7	106393	131880	145886	208705	247720	242748	285831	292998	292998	292415	292415	343900
651	Octanoic acid	124-07-2	60	73	144.115	C8H16O2	1180	0	0	0	6984.8	5636.11	4171.12	57368	79562	89433	56036	63452	64915	61832	66423	66423	71315	71315	73295
652	Acetoxyacetic acid	13831-30-6	73	74	118.027	C4H6O4	1020	0	0	0	255751	262253	257857	701877	854709	852416	1.47657e+06	1.44376e+06	1.38523e+06	1.67127e+06	1.68751e+06	1.68751e+06	1.80994e+06	1.80994e+06	1.87507e+06
653	2-Octenoic acid	1470-50-4	73	41	142.099	C8H14O2	1181	0	0	0	0	0	0	104899	158548	150179	109119	119376	126617	120022	123983	123983	120900	120900	124171
654	3-Hydroxycinnamic acid	588-30-7	164	163	164.047	C9H8O3	1621	0	0	0	0	0	0	2839	2024.47	2714	4648	3146	5911.9	3388	5501	5501	13020	13020	8043
655	Trans-Cinnamic acid	140-10-3	147	148	148.052	C9H8O2	1451	0	0	0	3179.85	3864.61	5125.18	36333.9	43636.1	59800.9	64343.9	74376	79543.8	89253.6	94160.4	94160.4	99840.2	99840.2	123947
656	Dodecanoic acid	143-07-7	73	60	200.178	C12H24O2	1567	0	0	0	0	0	0	120030	120109	166448	240381	244752	211355	265485	295455	295455	312340	312340	320861
657	2,6-Dihydroxy-Benzoic acid	303-07-1	136	108	154.027	C7H6O4	1397	0	0	0	2164.97	2339	3446	27633	19908	51902	52297	46172	43702	51842	65422	65422	81561	81561	86656
658	Thioacetylthioglycolic acid	17930-82-4	59	150	149.981	C4H6O2S2	1412	0	0	0	0	0	0	12420	13759	13455	17054	15227	19188	15178	19069	19069	17192	17192	15814
659	P-Anisic acid	100-09-4	135	152	152.047	C8H8O3	1452	0	0	0	2833.58	3803.02	3529.14	23920	30546	50153.6	53713	59165	60632	63632	69949	69949	68037	68037	81328
660	4-Aminobenzoic acid	150-13-0	120	137	137.048	C7H7NO2	1547	0	0	0	0	0	0	65872	75131	142672	158318	184625	159693	236491	260105	260105	275637	275637	295579
661	Ibuprofen	15687-27-1	161	163	206.131	C13H18O2	1626	0	0	0	34215	31556	33269	222178	247298	317404	511926	543012	503090	628983	724206	724206	755282	755282	855916
	Aldehyde
662	(Z)-6-Nonenal	2277-19-2	41	55	140.12	C9H16O	1101	9720196	9395275	8995725	28299083	29736608	26111760	71784789	86349317	84074726	98614572	105573259	105350150	107764858	112097241	112097241	110740704	110740704	108832058
663	2-Isopropyl-5-methylhex-2-enal	35158-25-9	41	43	154.136	C10H18O	1106	9.47457e+06	9.1644e+06	8.74511e+06	2.78959e+07	2.93216e+07	2.5737e+07	7.19506e+07	8.66873e+07	8.45515e+07	9.88785e+07	1.0591e+08	1.05663e+08	1.0811e+08	1.12385e+08	1.12385e+08	1.10547e+08	1.10547e+08	1.08837e+08
664	Paraldehyde	123-63-7	45	43	132.079	C6H12O3	776	3.77309e+06	3.63995e+06	3.51752e+06	3.29751e+06	3.09527e+06	3.19752e+06	3.12679e+06	3.25313e+06	3.09829e+06	2.86435e+06	2.91741e+06	2.95729e+06	2.78061e+06	2.97236e+06	2.97236e+06	2.90884e+06	2.90884e+06	2.9789e+06
665	Benzaldehyde	100-52-7	77	106	106.042	C7H6O	960	1.12857e+06	1.03209e+06	936906	2.27136e+06	2.50643e+06	2.19886e+06	2.01692e+06	2.73928e+06	2.55693e+06	2.1309e+06	2.43123e+06	2.24034e+06	2.22515e+06	2.29739e+06	2.29739e+06	2.1156e+06	2.1156e+06	2.17204e+06
666	(Z)-2-Decenal	2497-25-8	41	55	154.136	C10H18O	1252	942197	666303	647556	974061	1211723	1101326	1441495	1794755	1.9698e+06	1.69235e+06	1.89039e+06	1.81541e+06	1.96003e+06	2.13297e+06	2.13297e+06	2.15723e+06	2.15723e+06	2.29483e+06
667	Benzeneacetaldehyde	122-78-1	91	92	120.058	C8H8O	1049	861849	738705	675554	923225	1118729	1020628	2393857	3003745	3032352	1799685	2092273	2198241	1.67795e+06	1.69901e+06	1.69901e+06	1676564	1676564	2148210
668	Acetaldehyde ethyl cis-3-hexenyl acetal	28069-74-1	73	45	172.146	C10H20O2	1102	756445	705549	670618	1.28359e+06	1.35594e+06	1.18416e+06	2.77394e+06	3.46068e+06	3.4052e+06	3.89458e+06	4.11242e+06	4.09279e+06	4.14554e+06	4.30769e+06	4.30769e+06	4.31574e+06	4.31574e+06	4.30372e+06
669	2-Nonenal	2463-53-8	41	43	140.12	C9H16O	1161	600847	494724	441006	2.84584e+06	2.90097e+06	2.64723e+06	5.54311e+06	6.52135e+06	6.31754e+06	6.22572e+06	6.75383e+06	6.44613e+06	6.31837e+06	6.41738e+06	6.41738e+06	6.45838e+06	6.45838e+06	6.48748e+06
670	Metacetaldehyde	108-62-3	45	43	176.105	C8H16O4	1160	287136	197669	185672	2061996	2041212	1885720	3518186	4284397	4057801	4033885	4460303	4219559	4146023	4201222	4201222	4280888	4280888	4285793
671	5-Propan-2-ylbicyclo[3.1.0]hex-2-ene-2-carbaldehyde	57129-54-1	79	107	150.104	C10H14O	1190	191984	185174	179393	224200	252608	226016	220326	282037	261942	259794	277608	277810	276918	280121	280121	272895	272895	286150
672	cis-7-Decen-1-al	21661-97-2	41	55	154.136	C10H18O	1212	171279	149273	143471	170896	224526	209389	198417	233808	250371	185680	205080	223406	242665	234834	234834	229552	229552	234035
673	(2R,2'R,5'S)-Lilac aldehyde	53447-47-5	55	41	168.115	C10H16O2	1169	142497	145699	123208	234723	266839	239766	291722	371449	363053	381553	421601	398458	399814	417492	417492	433169	433169	433634
674	(E)-2-Decenal	3913-81-3	83	41	154.136	C10H18O	1263	97917.2	81056.5	77178.9	96072.6	123587	113965	115322	143785	142951	105790	134262	122075	135263	143569	143569	157012	157012	146318
675	(E)-2-Octenal	2548-87-0	41	55	126.104	C8H14O	1060	93183.8	83324.5	84596.9	108639	129016	121807	129594	138350	136563	118030	133570	145652	160075	159520	159520	148832	148832	152788
676	(E)-4-Decenal	65405-70-1	84	41	154.136	C10H18O	1198	89520.7	62514.1	60339.7	90054.4	98183.8	95782.6	97243.4	92041.5	109074	74498.8	98165	100498	113833	108849	108849	105307	105307	115161
677	Perillyl aldehyde	2111-75-3	68	79	150.104	C10H14O	1274	77494	60267	59497	71098	99699	86943	86468	95198	102456	77281	94589	89476	92893	101156	101156	104505	104505	96758
678	10-Undecenal	112-45-8	41	55	168.151	C11H20O	1297	52143.6	38073.9	36214.1	63007.6	80220.6	77922.7	94853.1	107635	109211	86251.9	112480	107741	127450	125116	125116	129471	129471	123503
679	E-2-Undecenal	53448-07-0	41	70	168.151	C11H20O	1366	45473.3	30756.9	31962.2	55937.8	78500	77545.1	55679.1	71117.4	73042.3	46955.5	44136.3	50158.8	61555.6	62621.4	62621.4	62209.7	62209.7	58250.6
680	3-Methyl-benzaldehyde	620-23-5	91	119	120.058	C8H8O	1071	37338.1	36418	27350.5	57856.8	64456	48264.7	42825.8	61858.8	67653	61862.3	67766.6	62126.7	63367.4	63078.2	63078.2	63779.1	63779.1	128294
681	(E)-6-Nonenal	2277-20-5	41	55	140.12	C9H16O	1124	27029	28278	26944	36288	40600.4	36303	35046	42799	65655	44799	49395	66073	65553	71160	71160	88611	88611	83412
682	Undecanal	112-44-7	41	57	170.167	C11H22O	1307	25824	18503	16504	29445	33838	34992	41905	45530	52839	38679	40163	34336	44937	43975	43975	44392	44392	46732
683	1-Naphthalenecarboxaldehyde	66-77-3	156	127	156.058	C11H8O	1547	24618	18268	17637	45111	57581	58741	99949	109496	109602	88991	103051	96038	91336	86567	86567	85218	85218	86966
684	2,6,6-Trimethylcyclohex-2-ene-1-carbaldehyde	432-24-6	81	123	152.12	C10H16O	1116	21076.6	19016.5	12544.3	18132.5	23334.9	22359.6	54051.7	59727	88016.2	68520.1	88064	86398.4	88399.4	109372	109372	96827.3	96827.3	86108.7
685	(E,Z)-2,6-Nonadienal	557-48-2	41	70	138.104	C9H14O	1155	19434	17268	19521	29346	32185	31278	40920	38823	49907	42752	52566	53758	55515	58111	58111	62130	62130	55728
686	2-Ethyl-benzaldehyde	22927-13-5	133	134	134.073	C9H10O	1176	17263.7	15052	15776	82894	84273	75832	22172	31975	39573	25449	25231	20319	23777	23199	23199	28886	28886	22213
687	2-Furaldehyde diethyl acetal	13529-27-6	97	125	170.094	C9H14O3	1078	13048.1	11125.6	11087.8	16287.9	16320.9	15348.2	15271.8	17575.2	19970.7	22626.5	23274.7	28397	33857.3	22375.7	22375.7	21318.4	21318.4	19783.2
688	7-Methyl-3-methylideneoct-6-enal	55050-40-3	69	41	152.12	C10H16O	1147	12991	15146	9540	20143	18731	24051	9864	19619	11125.2	7382	10557	8826	16173.7	14855	14855	7803.12	7803.12	13801
689	(E)-2-Dodecenal	20407-84-5	41	70	182.167	C12H22O	1468	11429	6873	5593	17187	21266	22808	96990	138493	163831	232946	272827	258284	323407	338748	338748	341701	341701	421660
690	(E,E)-2,4-Nonadienal	5910-87-2	81	41	138.104	C9H14O	1216	9937	7561	7995	12715	15749	7367	15150	18102	23267	23332	23298	18843	20519	15144	15144	20478	20478	18382
691	3-Methyl-3-(4-methylpent-3-en-1-ul)oxirane-2-carbaldehyde	16996-12-6	41	69	168.115	C10H16O2	1234	9838.36	12569.3	9182.76	61106.1	76320.4	57228.9	296412	416550	459229	331585	381215	383906	434742	458710	458710	464480	464480	470189
692	(E,E)-2,4-Decadienal	25152-84-5	81	41	152.12	C10H16O	1317	9402.11	9152.72	6281.93	27279.8	38841.3	37113.7	142465	200069	225521	177100	192271	187291	193835	215004	215004	215088	215088	220332
693	P-Menth-1-en-9-al	29548-14-9	94	79	152.12	C10H16O	1225	7344.79	6395.11	6779.51	23262.8	25647.7	29011	25791.1	34472.9	52092.9	47060.1	43394.4	49006.7	45219.8	45929.9	45929.9	57115.2	57115.2	60987.7
694	(E,E)-2,4-Undecadienal	30361-29-6	81	41	166.136	C11H18O	1430	6319.75	4686	6306.46	32965.3	34227.3	40819.3	138941	161841	177709	273708	326464	330897	369708	382729	382729	376237	376237	447676
695	3-Methoxycinnamaldehyde	56578-36-0	162	161	162.068	C10H10O2	1451	3911.28	2071.55	2435.93	20048.2	24996.2	27297.5	148717	192395	221374	291511	353062	346209	385658	431141	431141	425246	425246	534180
696	4-Isopropylcyclohexa-1,3-dienecarbaldehyde	1197-15-5	79	107	150.104	C10H14O	1283	2111	2634.83	1890	42375	59449	56051	70961	114254	111071	88000	96570	82430	83796	93090	93090	99769	99769	106500
697	2-Benzylideneheptanal	122-40-7	117	129	202.136	C14H18O	1654	1741.72	920.888	785.962	1337.52	1263.91	2861.44	10559.8	18126.2	22756.1	20029.8	34711.5	25142.1	40913.5	45258.2	45258.2	49499.4	49499.4	55417.1
698	(2E,4Z)-2,4-Decadienal	25152-83-4	81	41	152.12	C10H16O	1295	1691.26	1568.19	4809.88	2384.31	4642.9	3854.18	9212.39	6665.93	9994.2	14368.8	9041.95	7395.92	17502.5	14450.4	14450.4	13955.9	13955.9	11397.2
699	4-Methyl-2-phenyl-2-pentenal	26643-91-4	174	103	174.104	C12H14O	1383	1191	1073.89	1202	2891.35	2278	2177	5173	10651	12635	11159	12955	15071	13755	15060	15060	15803	15803	17743
700	(E)-2-Nonenal	18829-56-6	83	55	140.12	C9H16O	1162	0	0	0	393999	400228	386378	327074	379973	403990	410534	409821	377962	389076	425493	425493	488148	488148	473601
701	(E)-2-Hexenal	6728-26-3	98	83	98.073	C6H10O	854	0	0	0	6.42459e+06	6.64896e+06	5.71205e+06	1.61855e+07	1.97615e+07	1.93003e+07	1.67812e+07	1.71253e+07	1.69033e+07	1.54058e+07	1.73532e+07	1.73532e+07	1.72396e+07	1.72396e+07	1.54197e+07
702	3-Ethyl-benzaldehyde	34246-54-3	134	133	134.073	C9H10O	1168	0	0	0	42010.4	42324	36821	85461	100556	103232	104697	115443	109944	108915	116517	116517	103697	103697	109033
703	Isocyclocitral	1335-66-6	121	67	152.12	C10H16O	1163	0	0	0	127509	134600	127092	344221	423601	423585	396915	436320	410901	403210	404632	404632	387461	387461	416895
704	3-Methoxy-benzaldehyde	591-31-1	136	135	136.052	C8H8O2	1196	0	0	0	259642	278893	250535	560645	704761	717205	999244	1042493	988456	980277	1064110	1064110	1135191	1135191	1095009
705	Myrac aldehyde	37677-14-8	69	41	192.151	C13H20O	1540	0	0	0	14145.6	14600.9	14535.8	73565.8	78681.9	87638.4	123139	136354	137925	161943	154524	154524	160003	160003	187671
706	3-Formyl-5,5-dimethyl-2-cycolohexen-1-one	56621-35-3	96	68	152.084	C9H12O2	1285	0	0	0	14178	25135	18449.4	24502.6	30979	32654.9	24168	24253.3	22306.8	29838.3	33368.3	33368.3	31957.1	31957.1	26254
707	2,4-Dihydroxy-3,6-dimethylbenzaldehyde	34883-14-2	165	166	166.063	C9H10O3	1650	0	0	0	4470.14	6604.73	6659.53	26516	26648	62991	82492	84718	71455	100792	131986	131986	158001	158001	201071
708	Piperonal	120-57-0	149	150	150.032	C8H6O3	1334	0	0	0	33380	41612.3	34058	335661	489166	423228	751190	727852	495907	707280	852492	852492	818038	818038	814016
709	Trans-4-Methoxycinnamaldehyde	24680-50-0	162	131	162.068	C10H10O2	1570	0	0	0	0	0	0	15186	18966	27883	35178.1	32179	24407	41978	38876.2	38876.2	51878	51878	47817
	Others
710	2-Methylbutanoic anhydride	1468-39-9	85	57	186.126	C10H18O3	1190	1.48735e+06	1.26078e+06	1.14093e+06	1.75747e+06	2.18734e+06	2.01742e+06	1.86649e+06	2.18323e+06	2.29957e+06	1.62647e+06	1.89444e+06	1.969e+06	2.12315e+06	2.1714e+06	2.1714e+06	2.11565e+06	2.11565e+06	2.06218e+06
711	2-Methylprop-2-enoyl 2-methylprop-2-enoate	760-93-0	69	41	154.063	C8H10O3	1054	310376	240246	240369	278491	375322	361066	370551	390160	411216	312133	400904	410550	447576	456220	456220	450414	450414	438025
712	Butanoic acid, anhydride	106-31-0	71	43	158.094	C8H14O3	1120	114039	94493	91872	129069	165296	148295	157452	184062	200145	183649	237988	258040	259423	265781	265781	276874	276874	254326
713	Carbonochloridodithioic acid, methyl Ester	16696-91-6	76	91	125.936	C2H3ClS2	1033	23329.8	13167	15579.9	1.04334e+06	979429	943608	2.74596e+06	3.13281e+06	3.22505e+06	5.50511e+06	5.39206e+06	5.29485e+06	6.17587e+06	6.30232e+06	6.30232e+06	6.74942e+06	6.74942e+06	6.94109e+06
714	N-Pentyl methylphosphonofluoridate	13454-59-6	99	42	168.072	C6H14FO2P	1073	14674.4	17785.2	17404.3	25392	30547.1	23651.6	31647.5	39103.1	41204.2	40018.5	39484.3	46313	37280.6	49234.4	49234.4	44550.7	44550.7	47725.2
	Ether
715	Benzyl butyl ether	588-67-0	91	92	164.12	C11H16O	1267	146364	82963.4	45261.6	253321	279377	252660	281715	315226	382601	324764	367999	326318	357128	381250	381250	370888	370888	399032
	Halogenated hydrocarbon
716	2-Bromo dodecane	13187-99-0	57	71	248.114	C12H25Br	1505	493030	370183	309080	770572	927190	889143	5733277	6194565	7035877	7787213	8160918	8138033	8710307	9045307	9045307	9107266	9107266	9990812
717	1-Iodoundecane	4282-44-4	57	41	282.084	C11H23I	1534	269501	229009	180937	311455	361965	356064	358889	409156	474601	359675	370566	392708	427660	473226	473226	467553	467553	436566
718	1-Iodo-nonane	4282-42-2	85	71	254.053	C9H19I	1342	102752	81518	76434	129140	163192	164574	181235	199379	225216	157497	175399	166803	186200	205516	205516	192537	192537	181925
719	(E)-1,3-Dichloro-1-propene	10061-02-6	75	39	109.969	C3H4Cl2	763	100829	99195	92278.6	88977	84661	85510	76641	85838	81559	74516	77571	75185.2	72880	81539.6	81539.6	80957	80957	83554
720	1-Iodo-decane	2050-77-3	85	71	268.069	C10H21I	1433	83304	76485	67107	100711	131989	131253	130058	159866	179649	131315	167021	164518	175243	184004	184004	182530	182530	188994
	Sulfur compound
721	Disulfur compounds, ethyl 1-methylethyl	53966-36-2	136	94	136.038	C5H12S2	985	37245.8	28682.8	28413.7	43916.2	54584.9	56311.9	104349	118391	84802.7	62885.4	93464.2	91070	66471.1	69380.1	69380.1	59832.6	59832.6	57603.7
722	Tetrasulfur compounds, di-2-Propenyl	2444-49-7	41	73	209.967	C6H10S4	1532	26224.4	16002.1	16121.5	193135	236872	222806	800720	890982	1.00404e+06	1.39334e+06	1.54749e+06	1.53919e+06	1.7005e+06	1.74963e+06	1.74963e+06	1.70507e+06	1.70507e+06	1.95815e+06
723	Methyl furfuryl disulfide	57500-00-2	81	53	160.002	C6H8OS2	1226	12126	8872.18	8702.45	12627.3	11635	10975	88306	125605	139148	106491	120945	129452	140524	140696	140696	143086	143086	138296
724	Benzyl isothiocyanate	622-78-6	91	149	149.03	C8H7NS	1367	0	0	0	0	0	0	340912	401203	676975	962057	906967	758147	931983	1.14704e+06	1.14704e+06	1.36818e+06	1.36818e+06	1.52277e+06
	Nitrogen compounds
725	3-(1-Methylethylidene)-cyclopentanecarbonitrile	89683-72-7	93	135	135.105	C9H13N	1166	1656234	1522212	1465527	2556730	2584309	2454783	3639581	4509431	4303048	3959442	4.21444e+06	4117665	3969047	3.9577e+06	3.9577e+06	4013372	4013372	4.12144e+06
726	Imidodicarbonic diamide	108-19-0	60	44	103.038	C2H5N3O2	1237	428285	383902	373584	354917	350115	361119	316863	398173	386031	326622	368283	322350	323048	347312	347312	353048	353048	359724
727	Azo-T-butane	927-83-3	57	41	142.147	C8H18N2	817	272459	203127	275812	241283	292263	416536	468559	293559	335714	316918	215043	325839	374942	405587	405587	340270	340270	278873
728	Neral nitrile	31983-27-4	69	41	149.12	C10H15N	1231	27869	22684	17373	67807	75436	65670	693937	1015539	1118755	891810	1028846	1014087	1214174	1332507	1332507	1390008	1390008	1426668
729	3,3-Dimethylcyclobutanecarbonitrile	53783-86-1	56	41	109.089	C7H11N	921	6398.93	1823.4	1680.29	8142.15	5731.14	10682.8	15381.8	11029.7	12141.7	5919.15	5950.81	7892.39	9597.86	7815.92	7815.92	7474.89	7474.89	5237.03
730	2-Nonenenitrile	29127-83-1	108	67	137.12	C9H15N	1194	0	0	0	693195	956761	728721	1.4953e+06	1.9644e+06	1.19262e+06	1.49663e+06	1.67604e+06	1.40033e+06	1.519e+06	1591134	1591134	1.61916e+06	1.61916e+06	1.49497e+06
	Phenol
731	4,5-Dimethylbenzene-1,3-diol	527-55-9	138	123	138.068	C8H10O2	1490	1.53324e+06	1.02159e+06	891381	1.21361e+06	816525	942142	1.44482e+06	2.14706e+06	2.73508e+06	1.69614e+06	1.47294e+06	1.39511e+06	1.66157e+06	1.83054e+06	1.83054e+06	1.83494e+06	1.83494e+06	1.91062e+06
732	3-Methoxy-5-methylphenol	3209-13-0	138	109	138.068	C8H10O2	1318	601206	510161	469049	662588	872502	805396	685572	908942	990181	587583	656534	649687	630222	684347	684347	690992	690992	637991
733	2-Methoxy-phenol	90-05-1	109	124	124.052	C7H8O2	1089	187263	186231	172911	352286	396301	328510	507038	669230	625167	754356	751309	700437	775927	825426	825426	796086	796086	794910
734	3-Methyl-phenol	108-39-4	108	107	108.058	C7H8O	1075	31497.9	19488.1	11553.1	0	0	0	98434.1	127738	134560	124560	132113	223988	161370	170050	170050	180030	180030	178531
735	3-Nitro-phenol	554-84-7	139	65	139.027	C6H5NO3	1514	5897.01	6878	4570	16287	15806	14412	125948	123556	149563	169340	185045	187118	195502	200122	200122	207415	207415	238885
736	4-Ethyl-2-methoxy-phenol	2785-89-9	137	152	152.084	C9H12O2	1282	4203.76	5547	2930.32	42792	49683	47687	73186	93938	102901	80453	90189	81319	76684	89473	89473	99358	99358	87624
737	2-Naphthalenol	135-19-3	144	115	144.058	C10H8O	1521	1665.17	2716.69	2383.16	19750.2	18053.1	22241.9	65039	74080.7	84793.2	118144	132036	124080	140416	150137	150137	161315	161315	184726
738	p-Cresol	106-44-5	107	108	108.058	C7H8O	1077	0	0	0	29697.5	35673.8	35440.4	99897.4	123059	145694	154329	169437	170206	207011	207590	207590	188348	188348	194629
739	o-Hydroxybiphenyl	90-43-7	170	169	170.073	C12H10O	1507	0	0	0	13275.6	13254.8	14112.8	34146	42331.3	42347	51897.4	53644	46727	58077	59085.3	59085.3	54868	54868	59325
740	4-(3-Hydroxy-1-propenyl)-2-methoxy-phenol	458-35-5	137	180	180.079	C10H12O3	1669	0	0	0	17692	11778	15335.6	67096	84360	193451	301184	284459	251811	348378	445766	445766	547402	547402	684880
741	Orcinol	504-15-4	124	123	124.052	C7H8O2	1369	0	0	0	0	0	0	10898	17476.8	75266.6	35389	26801	32106	37005	56382	56382	141130	141130	188902
742	Trans-isoeugenol	5932-68-3	164	149	164.084	C10H12O2	1453	0	0	0	1592.47	1465.75	1071.56	4223.92	4850.48	15128.5	6562.93	11420.8	4226.54	6994.04	11725.9	11725.9	16830.3	16830.3	21812.9
743	4-Heptyl-phenol	1987-50-4	107	192	192.151	C13H20O	1671	0	0	0	19253.4	15768	14766.4	84137	91690	167865	310507	256189	225538	308029	343735	343735	379442	379442	414073
744	Hydroquinone	123-31-9	110	81	110.037	C6H6O2	1283	0	0	0	6653	11090.5	11868	16420	13518	19980	12707	15174	16024	13138	14577	14577	17015	17015	26385.9
745	2,3-Dihydro-1H-inden-5-ol	1470-94-6	133	134	134.073	C9H10O	1335	0	0	0	16905.8	20015	22002	128911	166314	199335	251720	224321	207994	255993	255557	255557	247181	247181	266665
746	4-Butyl-phenol	1638-22-8	107	150	150.104	C10H14O	1362	0	0	0	25333	27525.8	26612.3	95683	96789	203750	274207	285509	229078	270778	332069	332069	345480	345480	371495
747	Eugenol	97-53-0	164	103	164.084	C10H12O2	1358	0	0	0	470678	501589	446919	3139420	3809943	7523850	10740007	10346588	8859056	10689274	12695410	12695410	15318868	15318868	16284359
748	2,5-Di(butan-2-yl)phenol	54932-77-3	177	206	206.167	C14H22O	1566	0	0	0	0	0	0	8797	8569	11066	17246	15242	18271	19301	20376	20376	17137	17137	20889
749	4-Tert-amylphenol	80-46-6	135	107	164.12	C11H16O	1400	0	0	0	7115.92	9327.36	7007.01	50713.9	62543.9	111947	135878	132322	113501	154812	185942	185942	229674	229674	258858
750	Methyleugenol	93-15-2	178	163	178.099	C11H14O2	1403	0	0	0	9234.18	7553.99	5752.41	27328.5	38175.8	63380.5	58097.5	63897.1	50294.4	52886.6	66319.2	66319.2	77456.7	77456.7	82028.1
751	4-Sec-Butyl-2-tert-butylphenol	52184-13-1	177	191	206.167	C14H22O	1575	0	0	0	0	0	0	17050.4	16164.1	27646.3	33700.7	35802.7	36025.3	38716.2	44792.9	44792.9	39956.4	39956.4	53954.5
	Aromatics
752	4-Ethylanisole	1515-95-3	121	136	136.089	C9H12O	1110	9126979	8569448	8015683	37369733	40462525	34803415	125043756	158099507	154771427	190372052	200802908	199402977	207421888	219174187	219174187	215180741	215180741	212848469
753	(1-Methoxypropyl)benzene	59588-12-4	121	77	150.104	C10H14O	1104	9.05307e+06	8.49523e+06	7.9403e+06	3.7336e+07	4.04132e+07	3.47877e+07	1.25816e+08	1.5913e+08	1.55804e+08	1.90967e+08	2.0206e+08	2.00121e+08	2.08178e+08	2.20842e+08	2.20842e+08	2.16729e+08	2.16729e+08	2.14433e+08
754	Ethylbenzene	100-41-4	91	106	106.078	C8H10	855	3.54611e+06	3.38133e+06	3.10641e+06	3.54376e+06	4.45375e+06	4.12727e+06	3.22678e+06	4.00761e+06	3.73205e+06	2.535e+06	2.72813e+06	3.08692e+06	3.00027e+06	3.10612e+06	3.10612e+06	3.05095e+06	3.05095e+06	2.96148e+06
755	1,3-Dimethyl-benzene	108-38-3	91	106	106.078	C8H10	866	2.67537e+06	2.5062e+06	2.33596e+06	2.7165e+06	3.39745e+06	3.13681e+06	2.12607e+06	2.67339e+06	2.56617e+06	1.27277e+06	1.34008e+06	1.5374e+06	1.46638e+06	1.52005e+06	1.52005e+06	1.48586e+06	1.48586e+06	1.42566e+06
756	Naphthalene	91-20-3	128	129	128.063	C10H8	1182	2.02673e+06	2.04205e+06	1.88405e+06	1.18864e+06	1.29135e+06	1.1522e+06	712686	914802	877134	389318	426905	408741	394383	391470	391470	406467	406467	357342
757	Myristicin	607-91-0	192	91	192.079	C11H12O3	1520	1.48678e+06	1.18225e+06	1.02001e+06	947718	1.15292e+06	1.10746e+06	1.26779e+06	1.45219e+06	2.04386e+06	1.55269e+06	1.556e+06	1.39889e+06	1.39658e+06	1.57902e+06	1.57902e+06	1.78981e+06	1.78981e+06	1.76869e+06
758	1-Ethyl-3-methyl-benzene	620-14-4	105	120	120.094	C9H12	957	1376547	1242941	1207411	2937326	3299639	2876282	2874481	3680215	3602870	2942838	3302984	3054162	2968745	3152273	3152273	3020196	3020196	3109179
759	(5-Bromopentyl)-benzene	14469-83-1	91	92	226.036	C11H15Br	1487	1.33776e+06	855490	732833	1.12861e+06	784557	894747	2.7338e+06	3.55138e+06	4.70795e+06	6.96936e+06	7.3071e+06	7.22905e+06	8.59111e+06	9.53248e+06	9.53248e+06	9.64822e+06	9.64822e+06	1.53253e+07
760	1,2,3,5-Tetramethyl-benzene	527-53-7	119	134	134.11	C10H14	1117	654607	579844	526679	762629	934141	851991	653519	865077	891305	174127	197992	199745	231294	235718	235718	255208	255208	188539
761	(3-Bromo-1-methylpropoxymethyl)benzene	51666-29-6	91	92	242.031	C11H15BrO	1499	620622	329107	220501	1.12708e+07	1.35546e+07	1.31134e+07	1.30326e+08	1.42372e+08	1.59813e+08	1.9003e+08	2.00788e+08	1.98607e+08	2.15645e+08	2.26288e+08	2.26288e+08	2.23452e+08	2.23452e+08	2.55503e+08
762	(4-Methoxyphenyl)-hydrazine	3471-32-7	138	122	138.079	C7H10N2O	1325	597107	509844	465746	654531	861542	799827	678470	903535	983054	574413	653269	644865	624709	679753	679753	676282	676282	641688
763	1,1,6-Trimethyl-1,2-dihydronaphthalene	30364-38-6	157	142	172.125	C13H16	1354	316532	234043	211729	237435	302525	280463	214189	261969	379758	189220	191423	203670	227444	206200	206200	309700	309700	357848
764	N-Butyl-benzene	104-51-8	91	92	134.11	C10H14	1054	281005	200448	180771	238718	264213	234118	302121	361524	359558	284979	348942	331964	380109	361243	361243	507500	507500	384317
765	3,4-Dimethoxytoluene	494-99-5	152	137	152.084	C9H12O2	1233	244348	241137	216665	502280	563271	476267	306405	445451	415461	441536	436016	431893	353518	371755	371755	407885	407885	346808
766	1,2,4,5-Tetramethyl-benzene	95-93-2	119	134	134.11	C10H14	1115	223711	200994	185463	262615	334247	306173	231226	303002	307072	67001.4	86136.6	87975.4	112957	115972	115972	104078	104078	87121.9
767	1-Methoxy-cyclohexene	931-57-7	112	84	112.089	C7H12O	1014	208764	160916	166954	207137	258707	255356	271663	281515	471347	212065	254071	277842	307417	333192	333192	728120	728120	233576
768	1-Ethyl-3,5-dimethyl-benzene	934-74-7	119	134	134.11	C10H14	1059	201257	168869	151054	158980	195386	160680	150872	198743	182311	91614	99085.9	115999	122734	126990	126990	115268	115268	109627
769	1,2,4-Trimethyl-benzene	95-63-6	105	120	120.094	C9H12	990	191332	186147	193112	226783	278219	231497	180513	243742	240214	132112	126441	154901	196782	215548	215548	216112	216112	188620
770	2-Ethyl-1,4-dimethyl-benzene	1758-88-9	119	134	134.11	C10H14	1076	179112	154607	138672	200116	261592	235594	183830	242804	255607	82127.6	94658	96629	117352	128767	128767	119283	119283	104076
771	1-Methyl-4-(1-methylethenyl)-benzene	1195-32-0	117	132	132.094	C10H12	1090	176659	151368	143128	153733	191767	161755	130201	171384	159985	87181.2	98356	105463	104734	98183	98183	104045	104045	95284.9
772	2-Methyl-naphthalene	91-57-6	142	141	142.078	C11H10	1297	148066	95047.5	97550	118880	144371	134904	85318	109175	113938	95561	106902	96541	100284	113354	113354	110903	110903	211750
773	1-Methyl-3-(1-methylethenyl)-benzene	1124-20-5	132	117	132.094	C10H12	1082	123294	132643	134115	136821	131224	142086	90094.6	94281.5	106321	56879.7	63393.3	60699.8	53034.6	60062	60062	61861.1	61861.1	55310.3
774	P-Cymene	99-87-6	119	134	134.11	C10H14	1027	116676	101500	106396	123993	124206	116139	111728	140463	104539	91804.7	105052	106336	86336.9	75927.4	75927.4	73144.3	73144.3	67840
775	1-Methyl-naphthalene	90-12-0	142	141	142.078	C11H10	1307	102778	83168.2	66867.3	63971.8	70301.3	66569.2	43749.1	52689.4	55570.4	47269	46786	44024.9	42924.4	44371.6	44371.6	44320.4	44320.4	114307
776	Styrene	100-42-5	104	103	104.063	C8H8	893	80362	85297	68577	74610	94259	75149	57425	76894	71755	45324.1	40268	45655	39892	41838	41838	48649.2	48649.2	56724.8
777	Bibenzyl	103-29-7	91	182	182.11	C14H14	1525	66705.3	51393.2	43723.1	849759	1.0295e+06	1.00196e+06	3.90462e+06	4.33025e+06	4.86032e+06	6.8443e+06	7.61028e+06	7.63904e+06	8.36647e+06	8.76169e+06	8.76169e+06	8.46534e+06	8.46534e+06	9.89851e+06
778	4-Acetoxy-3-methoxystyrene	46316-15-8	150	135	192.079	C11H12O3	1452	60123.9	48526.6	34525.1	29578	41080	31291	42791	45647.3	61196	62574.1	51488.3	53623.4	45784.5	39094	39094	33408.8	33408.8	44502
779	1,2,3-Trimethyl-benzene	526-73-8	105	120	120.094	C9H12	1013	52026.7	31296.8	27371.4	32037.5	40027.9	31262.2	25664.8	47696.8	39550.1	25552.6	29384.7	32573.5	25596.4	32831.5	32831.5	26864.7	26864.7	45428.2
780	1,4-Diethyl-benzene	105-05-5	119	105	134.11	C10H14	1041	50725.9	40242.3	36732.1	85760.2	110432	114015	236122	281993	299118	141548	157662	194488	161082	165333	165333	153151	153151	157261
781	4-(2-Propenyl)-phenol	501-92-8	134	133	134.073	C9H10O	1255	47480	37435	35359	60453	60904	70059	115891	130545	165106	161674	183545	158962	182873	180115	180115	201700	201700	207156
782	Mesitylene	108-67-8	105	120	120.094	C9H12	972	43602.6	38075.6	34260.9	58270.4	54282.1	55459.8	34670.4	48370.1	48610.6	32143.3	41703.1	41111.4	48547.6	51024.5	51024.5	45984.7	45984.7	34605.9
783	1-Ethenyl-3,5-dimethyl-benzene	5379-20-4	132	117	132.094	C10H12	1110	31385.4	38974.1	31541	60692	62769	53499	153141	161643	152336	216559	238858	184341	202024	221546	221546	197912	197912	213560
784	Azulene	275-51-4	128	127	128.063	C10H8	1319	23776.9	17718.8	24861.3	22769.4	28122.7	27332.3	29096.7	34963.1	34952.8	24188.4	28933.3	26742.9	32707.5	33682.9	33682.9	32386.5	32386.5	35162.2
785	1-Methyl-2-nitro-benzene	88-72-2	120	65	137.048	C7H7NO2	1161	18661	13776.4	12009.2	42891	44050.5	39098.3	72116.8	89723	94139.7	76212.9	75522.6	77315.3	70316.4	83017	83017	86015.9	86015.9	81063.3
786	(1-Methylethyl)-benzene	98-82-8	105	120	120.094	C9H12	922	18197	14878	19093	18188	25305.5	23870	13345	20952	20672	7373.83	7300.45	7822.41	7752.9	7604.35	7604.35	13193	13193	12588
787	Benzene, [1-[[1-(1-methylethyl)-3-butenyl]oxy]ethyl]-, [S-(R*,R*)]- (9CI)	98088-51-8	105	106	218.167	C15H22O	1463	17597.7	17760.4	11788.6	165523	195536	180609	1.10116e+06	1.32014e+06	1.62534e+06	2.48138e+06	2.91333e+06	2.86658e+06	3.41957e+06	3.71892e+06	3.71892e+06	3.7317e+06	3.7317e+06	4.43217e+06
788	(-)-Geosmin	19700-21-1	112	41	182.167	C12H22O	1430	11555	8591.27	8971.43	11649.4	18303.7	12856.2	17454.3	20135	23303.3	19624.3	18648.2	19176	24503.3	25291.5	25291.5	22570.8	22570.8	24952.5
789	Benzyl ether	103-50-4	92	91	198.104	C14H14O	1650	7693	3679.02	3492.43	18180	27017	22857	108708	114886	201506	258023	261302	248861	334088	378972	378972	386471	386471	379985
790	Hexa-2,4-diyn-1-ylbenzene	520-74-1	153	152	154.078	C12H10	1501	7364.71	9006.83	5112.1	25262.4	28490.5	28062.8	248423	276416	294656	369279	392077	366569	431300	445355	445355	409580	409580	478195
791	1,8-Dimethyl naphthalene	569-41-5	156	141	156.094	C12H12	1472	7318	7160.39	1858.22	5419	4949	4213	9140	5750	10113	12414	10228	7930	10089	11613	11613	10054	10054	11429
792	α-Methylstyrene	98-83-9	118	117	118.078	C9H10	986	6187	2963	3805	3671.48	4268	6008.91	4475	6831	5218	3621	3819	5293.12	4099	9735	9735	5961	5961	5651
793	1-Methoxy-4-phenoxy-benzene	1655-69-2	200	185	200.084	C13H12O2	1632	5235.02	3227.23	3824.05	15036.6	17127.6	19265.3	40580.4	39754.2	32436.2	31044.6	41120.8	36963.9	33603.1	28872.6	28872.6	26140.2	26140.2	24860.4
794	1,1'-(1,3-Propanediyl)bis-benzene	1081-75-0	92	91	196.125	C15H16	1633	4903.74	5314	5522.82	6601	7681.93	7804	19025	22348	31703	42612	47024	39857	53095	72217	72217	60187	60187	57161
795	2,5-Di-tert-butyl-1,4-benzoquinone	2460-77-7	220	205	220.146	C14H20O2	1602	1793	792.931	861.605	3678.52	6625	4782	14376	13846	16635	15891	14530	14088	13113	18729	18729	19553	19553	22916
796	1,2-Diethyl-3,4,5,6-tetramethyl-benzene	33884-69-4	175	190	190.172	C14H22	1558	0	0	0	0	0	0	8866	6436	21045	30742	22347	29259	32149	44939	44939	50588	50588	60804
797	Trans-Anethole	4180-23-8	148	147	148.089	C10H12O	1283	0	0	0	112817	134500	122906	49835.2	76965.1	97600.9	50495.2	34645	42969.6	39200.9	40345.4	40345.4	35668.8	35668.8	45525.1
798	1-(3-Methylbutyl)-2,3,5,6-tetramethylbenzene	116761-73-0	147	148	204.188	C15H24	1580	0	0	0	0	0	0	39566	40985	67465	78009	88116	73480	105361	113913	113913	124764	124764	185356
799	(2-Nitroethyl)-benzene	6125-24-2	104	105	151.063	C8H9NO2	1304	0	0	0	0	0	0	23023.4	31598	43747.7	51530	57143.8	39831	64749.8	70490	70490	83031	83031	96470
800	Anethole	104-46-1	148	147	148.089	C10H12O	1287	0	0	0	75527	121759	104693	34422	61152	88265	50916	41661.2	40515	32875	36950	36950	46499.7	46499.7	50791
801	1-Methoxy-2-nitro-benzene	91-23-6	77	106	153.043	C7H7NO3	1368	0	0	0	38746.8	47623.6	48750.2	620600	770310	893412	906491	993995	923378	1.00487e+06	1.09849e+06	1.09849e+06	1.12521e+06	1.12521e+06	1.21055e+06
802	1,6-Dimethyl-naphthalene	575-43-9	156	141	156.094	C12H12	1422	0	0	0	10426.1	18233.4	15406.4	10535.6	17048.5	17960.2	14836.1	15725.1	11498.3	13798.9	13630.3	13630.3	15593.5	15593.5	53369.7
803	Diphenylmethane	101-81-5	168	167	168.094	C13H12	1434	0	0	0	10103.9	13956.8	9162.21	12891.8	13899.5	16718.5	13296.3	13054.7	13587.9	14409	15596.5	15596.5	16473.5	16473.5	18618.9
	Alcohol
804	Hotrienol	20053-88-7	71	82	152.12	C10H16O	1106	24473219	22519473	20906882	92030308	99540099	85994774	283234246	350381442	348814219	415324432	436210952	435134980	446462173	464251294	464251294	463803750	463803750	461553562
805	1-Nonen-4-ol	35192-73-5	55	83	142.136	C9H18O	1103	1.31588e+07	1.23768e+07	1.15301e+07	3.95915e+07	4.27035e+07	3.67493e+07	1.11258e+08	1.37362e+08	1.35856e+08	1.60454e+08	1.71687e+08	1.71007e+08	1.75007e+08	1.82359e+08	1.82359e+08	1.80867e+08	1.80867e+08	1.80454e+08
806	(R)-2-Hexanol	26549-24-6	45	41	102.104	C6H14O	780	3747217	3651432	3498823	3282071	3103940	3223709	3134343	3234798	3079527	2874284	2928151	2999219	2923561	2983303	2983303	2922342	2922342	2956957
807	4-Methyl-benzenemethanol	589-18-4	107	122	122.073	C8H10O	1106	3620454	3439269	3280070	12676597	13702079	11835477	39938587	49964933	49123237	59452893	62615452	62252888	64688481	67290345	67290345	66732676	66732676	65435733
808	1-Phenyl-3-buten-1-ol	936-58-3	107	79	148.089	C10H12O	1244	2.29568e+06	2.07211e+06	1.96391e+06	1.88155e+06	1.92026e+06	1.91963e+06	1.67498e+06	2.0993e+06	2.07068e+06	1.72264e+06	1.92955e+06	1.71329e+06	1.65756e+06	1.79581e+06	1.79581e+06	1.8398e+06	1.8398e+06	1.83489e+06
809	(E)-2-Decen-1-ol	18409-18-2	57	41	156.151	C10H20O	1257	978454	802090	752966	1.04345e+06	1.30553e+06	1.22091e+06	1.20483e+06	1.42689e+06	1.53042e+06	1.08797e+06	1.29746e+06	1.3242e+06	1.46641e+06	1.49875e+06	1.49875e+06	1.49243e+06	1.49243e+06	1.4802e+06
810	2-Methyl-1-phenyl-2-propanol	100-86-7	92	59	150.104	C10H14O	1159	963197	675233	654391	2.25687e+07	2.34558e+07	2.10653e+07	61139077	74250141	71521025	71191655	76510466	73246218	69092836	70459721	70459721	70843071	70843071	71760921
811	(E)-2-Nonen-1-ol	31502-14-4	57	41	142.136	C9H18O	1169	839208	658000	565469	788626	925922	872489	873939	1024144	1103341	842428	1012510	985477	1037676	1132364	1132364	1170689	1170689	1115450
812	4-Hexen-1-ol, acetate	72237-36-6	67	82	142.099	C8H14O2	1020	785841	605083	586736	618199	796208	721528	733463	979872	919440	591876	733101	779796	724541	731480	731480	708539	708539	682133
813	(E)-6-Nonen-1-ol	31502-19-9	41	67	142.136	C9H18O	1167	656385	531329	484094	2869442	2949601	2664981	5586142	6566708	6364393	6276250	6750823	6488888	6352283	6450230	6450230	6501191	6501191	6391577
814	Benzyl alcohol	100-51-6	79	108	108.058	C7H8O	1036	647244	281905	239956	3.52491e+07	3.73726e+07	3.26205e+07	1.05075e+08	1.26068e+08	1.29711e+08	2.22838e+08	2.18223e+08	2.1291e+08	2.46403e+08	2.55629e+08	2.55629e+08	2.77648e+08	2.77648e+08	2.88386e+08
815	2-Cyclopentylethanol	766-00-7	67	68	114.104	C7H14O	1003	606259	620163	526818	6.73488e+07	7.09795e+07	6.42256e+07	1.58277e+08	1.99082e+08	1.89619e+08	1.62715e+08	1.70873e+08	1.73528e+08	1.82155e+08	1.8808e+08	1.8808e+08	1.87883e+08	1.87883e+08	1.7573e+08
816	1-Pentanol	71-41-0	42	55	88.089	C5H12O	766	580537	485414	386945	379893	352934	402729	395521	337921	398026	297628	314637	298162	369253	382692	382692	246571	246571	299241
817	2,6-Dimethyl-7-octene-2,6-diol	29210-77-3	71	68	172.146	C10H20O2	1237	487818	404748	366622	497813	602207	568529	571326	661355	745738	520063	602346	611711	672912	706947	706947	697255	697255	712171
818	2-Methyl-5-(1-methylethyl)-1-cyclopentene-1-methanol	80113-82-2	93	111	154.136	C10H18O	1199	437395	389925	366354	7.41205e+06	8.14765e+06	7.02478e+06	2.07238e+07	2.60422e+07	2.63027e+07	3.75342e+07	4.10859e+07	3.8622e+07	4.01102e+07	4.19877e+07	4.19877e+07	4.27817e+07	4.27817e+07	4.34182e+07
819	1-Decanol	112-30-1	70	55	158.167	C10H22O	1272	397687	330937	301765	395881	493506	471177	470347	548023	596686	392240	503026	500530	547421	587364	587364	538477	538477	546933
820	1-Octen-1-ol, acetate	77149-68-9	99	128	170.131	C10H18O2	1191	388715	307008	300195	441336	532156	474188	459242	526261	543810	388088	445065	484599	512660	526067	526067	520675	520675	495522
821	Trans-2-Undecen-1-ol	75039-84-8	57	41	170.167	C11H22O	1365	262801	200803	180016	410429	497624	473969	466479	545630	602817	406447	460647	453862	515907	525750	525750	525548	525548	460040
822	2,4-Decadien-1-ol	14507-02-9	41	55	154.136	C10H18O	1274	250488	195768	184074	247083	304923	283347	273852	345010	349462	242438	288978	296869	340965	344931	344931	344331	344331	340556
823	1-Nonanol	143-08-8	56	55	144.151	C9H20O	1173	244504	211408	183868	242993	234951	260474	238310	295777	332768	235646	287786	285072	305919	315246	315246	323326	323326	326782
824	(Z)-3-Octen-1-ol	20125-84-2	55	81	128.12	C8H16O	1055	226307	189985	194683	249058	325072	318637	332945	351141	373789	277212	355645	358045	425651	409075	409075	437703	437703	405672
825	6-Undecanol	23708-56-7	83	55	172.183	C11H24O	1277	217575	182331	166277	218026	272325	256112	258202	297839	323238	232512	271071	282611	297510	305446	305446	298308	298308	303028
826	2-Methyl-3-(1-methylethenyl)-(1α,2α,3α)-cyclohexanol	54244-81-4	83	55	154.136	C10H18O	1196	208893	156512	153964	237269	291844	255239	258947	301974	300803	239144	273975	288960	293448	310572	310572	302530	302530	295582
827	(6Z)-Nonen-1-ol	35854-86-5	41	67	142.136	C9H18O	1171	191735	125816	153952	266759	319524	278694	276026	321618	315439	323682	364195	337776	336916	362168	362168	355091	355091	338515
828	2-Ethyl-1-dodecanol	19780-33-7	57	41	214.23	C14H30O	1591	185941	119805	89871	347872	407496	431423	459451	501224	601574	404505	448781	436850	430366	473563	473563	535920	535920	557800
829	2,6-Dimethyl-(Z)-2,7-octadiene-1,6-diol	103619-06-3	71	67	170.131	C10H18O2	1361	172568	134560	112969	222183	292659	277001	282515	342618	375553	267901	321211	304767	354021	373694	373694	363632	363632	349880
830	Trans,cis-2,6-Nonadien-1-ol	28069-72-9	41	69	140.12	C9H16O	1170	162987	125816	118270	231596	266840	243868	275885	329103	324815	333260	364195	346135	344402	366553	366553	363349	363349	338515
831	Cyclooctanemethanol	3637-63-6	69	55	142.136	C9H18O	1073	127846	90500	97367	118325	155330	153225	142531	159797	185982	135432	164756	165405	193229	204029	204029	219136	219136	216926
832	1-Phenylethanol	98-85-1	79	107	122.073	C8H10O	1061	118279	95858	91751	231950	202527	185682	176342	225915	230963	207658	219729	218422	194920	226091	226091	228805	228805	335660
833	(E)-2,6-Dimethylocta-3,7-diene-2,6-diol	51276-34-7	82	71	170.131	C10H18O2	1191	101468	80098.7	85167.5	131934	150381	141524	205819	254056	241983	267536	294926	284529	294470	321201	321201	308831	308831	296244
834	2,6-Dimethyl-3,7-octadiene-2,6-diol	13741-21-4	82	71	170.131	C10H18O2	1193	93515	75656	72511.1	129724	148388	140396	205841	254219	243716	276163	296188	295681	320096	321693	321693	316263	316263	302031
835	3,5,5-Trimethyl-1-hexanol	3452-97-9	57	41	144.151	C9H20O	1047	82292.1	57946.7	62350.1	85585.4	112467	102323	114572	113497	126836	99805.3	124511	124146	147398	142377	142377	137982	137982	138245
836	5-Undecanol	37493-70-2	69	55	172.183	C11H24O	1288	55622.7	47032	41903.5	49068.6	71690.2	70430.7	71754.4	79773.7	84223.7	70754.5	71094.8	80475.8	85777.9	88259.4	88259.4	91064.4	91064.4	80519.4
837	Glycidol	556-52-5	44	43	74.037	C3H6O2	755	52085.1	91169.1	72619.2	54918.7	85262.1	66666	81641.6	76198.8	119045	42657.7	70060.2	55716.6	74277	58987	58987	58073.4	58073.4	67107.3
838	4-Methyl-1-hexanol	818-49-5	70	69	116.12	C7H16O	953	50459	41903	47809	60973	73454	69486	77586	82148	83142	61180	85936	79873	98080	89716	89716	84298	84298	85179
839	(S)-2,5-Dimethyl-3-vinylhex-4-en-2-ol	35671-15-9	81	59	154.136	C10H18O	1039	44055.6	24166.7	36891.1	101082	120510	114444	295437	375320	379114	180246	208117	248257	204028	203087	203087	198426	198426	196557
840	3,5-Dimethyl-cyclohexanol	5441-52-1	71	95	128.12	C8H16O	1030	39402.9	27532	28118	43341.9	46996	47674	38504	40724.3	72988.9	40480.6	44846	50011	53639.3	61137.1	61137.1	76400.8	76400.8	33620
841	2-Ethyl-1-hexanol	104-76-7	57	41	130.136	C8H18O	1030	37059.6	29300.3	24943.8	60354.9	60222.6	61193.6	56699.7	58169.3	64064.9	64599.4	74088.1	78335.8	83323.5	83909.9	83909.9	87053.5	87053.5	76950.3
842	2-(2-Hydroxyethoxy)ethanol 1-nitrate	20633-16-3	45	46	151.048	C4H9NO5	1195	31477.8	36595.2	26849.8	106114	128363	104691	237727	308985	315358	418189	448744	433835	454535	478521	478521	470260	470260	488256
843	2-(1-Methyl-2-prop-1-en-2-ylcyclobutyl)ethanol	30820-22-5	68	67	154.136	C10H18O	1183	29677.9	15828.6	16770.6	45866	58364	58587.2	918758	1.23047e+06	1.33288e+06	851420	983757	992534	963204	1.036e+06	1.036e+06	1.09173e+06	1.09173e+06	1.00265e+06
844	4-Phenyl-2-butanol	2344-70-9	117	91	150.104	C10H14O	1241	27788.6	20905.6	24259.1	22538.7	25105.2	23941.8	20396.4	29813.6	34992	21060.2	22122.6	25612.5	24744.1	25600.3	25600.3	27271.9	27271.9	25188.7
845	1-Ethenyl-cyclohexanol	1940-19-8	83	70	126.104	C8H14O	1020	25997	20326	17805	23403	34298	30969	34870	31225	140516	32737	28779	32586.3	40293.1	40655	40655	292012	292012	9
846	4-Hydroxy-benzenemethanol	623-05-2	95	77	124.052	C7H8O2	1426	23420.1	18197.8	15253.7	58429.5	59347.9	68187.6	190914	218843	261016	378919	439937	453476	473910	517406	517406	505878	505878	710602
847	(E,E)-2,4-Heptadien-1-ol	33467-79-7	79	77	112.089	C7H12O	1004	21442.2	20491.4	16831.1	1.79901e+06	1.8761e+06	1.68315e+06	4.18598e+06	5.34934e+06	5.08876e+06	4.29738e+06	4.48621e+06	4.60877e+06	4.83763e+06	5.00561e+06	5.00561e+06	4.96756e+06	4.96756e+06	4.58137e+06
848	6,10-Dimethyl-5,9-undecadien-2-ol	53837-34-6	109	69	196.183	C13H24O	1459	17266.8	12571.9	6206.41	44203.3	48639.1	48692.4	282773	336553	402389	686615	791306	799398	890100	913444	913444	893701	893701	1.2566e+06
849	3-Mercaptohexanol	51755-83-0	55	41	134.077	C6H14OS	1127	16785.4	17003.8	9641.56	23438.5	30291.6	20190.1	41316.2	62140.8	60273.1	49963	61546.3	68662.7	66503.1	84691.4	84691.4	67648.1	67648.1	82990
850	1,2,4-Benzenetriol	533-73-3	126	52	126.032	C6H6O3	1507	13467.2	9115.46	8326.33	28611.1	40400.7	34770.1	202015	220019	244301	266221	306362	305823	329794	347791	347791	332331	332331	381462
851	1-Octanol	111-87-5	56	55	130.136	C8H18O	1072	9360.31	12592.2	15482.8	12434.4	14941.9	18892.3	17260.8	17770.2	18600.9	16650.9	17561.5	22097.9	28477.8	24946.9	24946.9	23641	23641	23368.1
852	(Z)-8-Dodecen-1-ol	40642-40-8	55	67	184.183	C12H24O	1468	8160.92	6151.79	4389.71	20926.9	21277.3	23848.1	87255.8	107431	134829	190490	230617	225023	255291	284720	284720	291625	291625	347307
853	1-Methyl-cyclohexanol	590-67-0	71	58	114.104	C7H14O	908	7667.34	2776.01	4744.07	13510	15357	11681	19568	19445	20067	14246	17661	15044.8	15569	13625.1	13625.1	17868	17868	12528.3
854	β-Phenylethylmethylethylcarbinol	10415-87-9	91	73	178.136	C12H18O	1382	6058.13	6233	5404	73994	76975	79166	367494	464534	517666	639955	736115	683957	711447	760102	760102	785932	785932	849630
855	(1R,2R)-1-(4-Methylphenyl)-2-methyl-3-buten-1-ol	83173-76-6	121	93	176.12	C12H16O	1393	4603.68	1742.93	2326.82	24181.5	28698	27803.4	214937	250415	291933	531984	589877	581169	628432	704499	704499	694892	694892	994421
856	P-Menth-1-en-9-ol	18479-68-0	94	93	154.136	C10H18O	1295	2561	3331.45	2203	2270.22	2947.15	3868	23566	34502	43330	33777	51126	37507	43272	41246	41246	37735	37735	44774
857	(Z)-2-Penten-1-ol	1576-95-0	57	41	86.073	C5H10O	768	0	0	0	3.37303e+06	3714251	3105727	0	0	0	0	0	0	0	0	0	0	0	0
858	1-Hexanol	111-27-3	56	43	102.104	C6H14O	868	0	0	0	394632	399612	307281	336792	498470	456946	428533	430704	388594	356303	397659	397659	340389	340389	412279
859	2-Octanol	123-96-6	45	55	130.136	C8H18O	998	0	0	0	207809	213347	189409	477610	602048	570787	477021	518949	524325	533597	566495	566495	572575	572575	553446
860	(Z)-3-Hexen-1-ol	928-96-1	67	41	100.089	C6H12O	858	0	0	0	1.1535e+07	1.2379e+07	1.00889e+07	3.07048e+07	4.112e+07	4.0183e+07	3.15633e+07	3.49669e+07	3.50024e+07	3.35118e+07	3.57781e+07	3.57781e+07	3.50622e+07	3.50622e+07	3.36117e+07
861	11,11-Dimethyl-4,8-dimethylenebicyclo[7.2.0]undecan-3-ol	79580-01-1	136	69	220.183	C15H24O	1646	0	0	0	0	0	0	45262	50634	207710	132241	115760	108106	197785	236048	236048	265693	265693	282324
862	1-Adamantanol	768-95-6	95	152	152.12	C10H16O	1333	0	0	0	52359	62727.9	64373.6	363227	394931	445674	569163	568069	535993	603534	621257	621257	639904	639904	639379
863	Sandacanol	28219-61-6	121	108	208.183	C14H24O	1559	0	0	0	0	0	0	74042	95016	168245	211615	214881	193381	291767	344875	344875	427748	427748	550048
864	cis-9-Tetradecen-1-ol	35153-15-2	55	82	212.214	C14H28O	1666	0	0	0	8803.43	4936.57	6862.29	35748	48693.2	73303	124442	139840	126061	160074	189917	189917	213005	213005	231950
865	1-Dodecanol	112-53-8	55	69	186.198	C12H26O	1474	0	0	0	33362	37340	38151.9	182110	203210	228444	341815	391599	389244	419573	450820	450820	366218	366218	521306
866	4-(2,6,6-Trimethyl-cyclohex-1-enyl)-butan-2-ol	3293-47-8	123	93	196.183	C13H24O	1452	0	0	0	0	0	0	13016	19439.6	30454	26053.4	24713.4	24924.4	31337.9	39414.6	39414.6	35631.8	35631.8	51381.7
867	2-(4-Chloro-phenylamino)-ethanol	2933-81-5	140	142	171.045	C8H10ClNO	1514	0	0	0	0	0	0	49299.3	57632.7	62371.6	83308.7	86618.4	85226	91017.8	86246	86246	90532.2	90532.2	100809
868	(2E,4S,7E)-4-Isopropyl-1,7-dimethylcyclodeca-2,7-dienol	198991-79-6	81	123	222.198	C15H26O	1574	0	0	0	244854	316869	287451	1.43346e+06	1.53796e+06	1.32651e+06	2.43039e+06	2.6137e+06	2.55319e+06	2.3436e+06	2.49053e+06	2.49053e+06	2.32144e+06	2.32144e+06	2.62994e+06
	Amine
869	N-Methyl-N-2-propenyl-1-butanamine	24209-62-9	84	42	127.136	C8H17N	856	1.60752e+06	1.27185e+06	1.15094e+06	860128	814919	1.3972e+06	1.50244e+06	827238	1.07155e+06	1.14939e+06	863365	1.15156e+06	1.2013e+06	1.07269e+06	1.07269e+06	1.14708e+06	1.14708e+06	1.19845e+06
870	N-Methylene-ethenamine	38239-27-9	55	54	55.042	C3H5N	727	589803	488104	475552	399094	587729	583053	531048	584765	631519	457256	603049	592198	693040	653720	653720	634988	634988	657913
871	N,N-Dimethyl-benzenamine	121-69-7	120	121	121.089	C8H11N	1101	318303	284923	269431	1.08448e+06	1.1525e+06	980302	3.61299e+06	4.57332e+06	4.37683e+06	5.30696e+06	5.52811e+06	5.54395e+06	5.76015e+06	6.05246e+06	6.05246e+06	5.86296e+06	5.86296e+06	5.76464e+06
872	N,N,N',N'-Tetramethyl-1,6-hexanediamine	111-18-2	58	42	172.194	C10H24N2	1206	62493.1	51802	48656	60700	76373	81909.5	85952.6	90122	111604	72320	81176.2	80125.5	92818	93231.2	93231.2	82321.2	82321.2	83410
873	(R)-(+)-1-(P-Tolyl)Ethylamine	4187-38-6	120	93	135.105	C9H13N	1185	37305.1	23626.3	24390.5	55064.7	53502.7	46557.3	18914.6	27660.3	37864.3	21356.1	20766.1	19239.3	24058.3	24046.7	24046.7	16130.3	16130.3	23078.7
874	N-Methyl-1-octanamine	2439-54-5	44	58	143.167	C9H21N	1088	31648.9	43174.9	36951	71043	65217.1	67826.7	106121	124961	138466	171526	155526	200939	152733	190551	190551	186746	186746	186397
875	2-Dimethylamino-4-methyl-pent-4-enenitrile	94492-10-1	83	42	138.116	C8H14N2	1014	25639.3	23584.6	26231	3.90775e+06	4.09424e+06	3.72307e+06	9.49967e+06	1.21931e+07	1.15887e+07	9.73708e+06	1.01412e+07	1.03977e+07	1.10475e+07	1.14216e+07	1.14216e+07	1.12564e+07	1.12564e+07	1.04131e+07
876	Amantadine	768-94-5	94	151	151.136	C10H17N	1231	24014	24079.7	20838	30656	39873	31316	28431	33646	37301	28050	37625	43030	30848	32680	32680	42524	42524	49800
877	Hordenine	539-15-1	58	59	165.115	C10H15NO	1495	21814	19802	18289	63615.2	74953.2	72060.2	523474	569420	643350	746576	792105	773361	834567	854412	854412	842635	842635	931701
878	Niacinamide	98-92-0	122	78	122.048	C6H6N2O	1419	11369.3	9343.04	8586.45	30313.5	34858	35608.1	100988	115996	142309	202756	237434	229286	265180	277401	277401	274597	274597	377020
879	2-Cyano-2-ethyl-butyramide	18705-38-9	82	97	140.095	C7H12N2O	1287	7543	5779	7090	17999	21773	18673	30530	35984	36591	29569	30890	32529	36020	33850	33850	27752	27752	32632
880	1-Phenylcyclohexylamine	2201-24-3	132	175	175.136	C12H17N	1517	5888.04	2730.08	4879.54	45966.1	46217	47945.5	213016	236744	254863	402959	467930	431674	515232	534919	534919	555456	555456	601453
881	Diethylpropion	90-84-6	100	59	205.147	C13H19NO	1497	4953	2777.7	3319.6	6828.48	8078.84	7647.25	28646	31931	28637	36012	32456	36151	38214	34842	34842	31522	31522	40242
882	N,N-Dimethylhexanamide	5830-30-8	87	45	143.131	C8H17NO	1017	0	0	0	143208	164668	137382	446525	522510	543964	938409	925413	893123	1.02748e+06	1.07103e+06	1.07103e+06	1.13509e+06	1.13509e+06	1.1949e+06
883	2,5-Dimethyl-benzenamine	95-78-3	121	106	121.089	C8H11N	1171	0	0	0	0	0	0	64358	93859	81032	101256	118561	101436	141931	142525	142525	137467	137467	153838
884	M-Aminophenylacetylene	54060-30-9	117	89	117.058	C8H7N	1203	0	0	0	41647.2	44177	37420.2	97497	107060	127995	171632	174144	178003	201307	186743	186743	198132	198132	180198
885	Benzamide	55-21-0	77	105	121.053	C7H7NO	1344	0	0	0	281029	355550	361657	2.34705e+06	2.54977e+06	2.87802e+06	3.63644e+06	3.67612e+06	3.48637e+06	3.86436e+06	4.06183e+06	4.06183e+06	4.13517e+06	4.13517e+06	4.18009e+06
886	N-Methyl-3,4-methylenedioxyamphetamine	42542-10-9	58	135	193.11	C11H15NO2	1568	0	0	0	0	0	0	11461.9	12973.2	17185.1	18862.3	19859.2	15454.6	21655.6	23728.9	23728.9	22428.9	22428.9	25141.1
887	N,N'-Methylenebismethacrylamide	2359-15-1	69	113	182.106	C9H14N2O2	1651	0	0	0	28055.3	30306	33626.9	111560	117134	305658	324806	310156	285973	414660	498456	498456	560720	560720	621350

## Sheet: Table S2
Table S2. The content of differential VOCs in subclass 1
No.	Volatile compounds	CAS	Content (ug/kg)
			BT	R1	R2	R3	R4	T1
1	3-Methyl-4-methylenebicyclo[3.2.1]oct-2-ene	49826-53-1	471.25±58.65	16486.87±1167.58	48967.64±2856.62	54023.81±1544.96	51227.29±934.04	51043.68±2308.93
2	2-Acetyl-3,5-dimethylpyrazine	54300-08-2	431.11±58.38	15693.24±1041.94	47197.96±2729.67	52236±1439.41	50319.02±757.75	49743.77±1524.59
3	Indole	120-72-9	-	2661.64±149.41	36352.12±1910.24	47417.05±1309.8	48921.34±2028.72	48717.61±1148.96
4	Methyl anthranilate	134-20-3	-	5184.92±612.74	34330.78±2195.24	42758.09±1369.39	43824.35±526.09	42756.63±1510.12
5	Cis-Carvyl acetate	7111-29-7	-	5184.92±612.74	34342.81±1844.11	42556.9±1657.97	43463.32±809.07	42604.94±1464.53
6	1,5-Dimethyl-1-vinylhex-4-enyl valerate	10471-96-2	43.56±26.66	2044.16±240.2	24856.06±2580.84	34872.87±464.86	38169.78±553.79	40927.04±2118.68
7	1-Isopropenyl-2,4-dimethyl-1-cyclohexene	56763-60-1	1691.84±22.25	7395.6±589.72	27206.17±2545.1	37037.21±643.82	38972.78±304.52	37328.39±1756.66
8	Linalool	78-70-6	1504.27±57.25	6186.43±521.74	22762.31±2547.46	31520.72±561.96	33302.83±627.75	32622.59±1480.97
9	(Z)-Pent-2-enyl butyrate	42125-13-3	1478.67±55.17	6148.8±518.83	22729.72±2538.3	31477.21±559.82	33242.93±618.86	32571.97±1479.89
10	Hotrienol	20053-88-7	1303.45±48.88	5726.26±484.9	22361.23±2445.55	31119.7±546.27	32873.38±601.58	32239.97±1473.76
11	Methyl benzoate	93-58-3	327.76±10.69	1421.23±156.78	25032.22±1786.62	27149.26±756.9	30378.77±537.99	30813.46±905.95
12	Methyl salicylate	119-36-8	251.13±37.2	5557.04±451.45	19864.48±2477.35	29593.77±719.38	29953.8±483.6	30045.08±1255.53
13	1-Methyl-4-(1,2,2-trimethylcyclopentyl)cyclohexa-1,3-diene	29621-78-1	26.37±10.5	1234.92±149.66	16545.26±1896.48	24180.5±521.46	27052.82±324.56	29609±1683.93
14	(3S,3As,5R)-3,8-Dimethyl-5-prop-1-en-2-yl-1,2,3,3A,4,5,6,7-octahydroazulene	3691-11-0	29.09±14.09	1078.48±130.87	14287.46±1619.59	20829.65±446.83	23346.28±314.49	25569.78±1450.1
15	Eremophilene	10219-75-7	27.5±15.61	1086.7±131.63	14332.72±1619.43	20904.53±469.33	23371.15±244.31	25426.93±1451.98
16	3-Methyl-2(3H)-benzofuranone	32267-71-3	-	1509.54±174.36	12933.99±1635.72	19329.25±1276.73	21258.52±853.65	21034.38±894.34
17	(3-Bromo-1-methylpropoxymethyl)benzene	51666-29-6	22.2±10.94	783.36±89.88	9856.36±1103.87	14256.31±309.24	15912.45±250.92	17432.25±952.54
18	α-Muurolene	10208-80-7	14.82±6.71	681.12±81.85	8397.15±950.93	12499.05±336.6	14100.85±182.58	15427.01±913.66
19	(1-Methoxypropyl)benzene	59588-12-4	489.47±11.63	2321.68±200.29	10030.08±1155.48	14346.11±312.73	15441.87±286.79	14954.41±762.33
20	4-Ethylanisole	1515-95-3	493.78±11.41	2323.72±201.31	9965.55±1145.72	14283.94±287.12	15347.16±254.74	14836.63±763
21	2,6,6-Trimethylbicyclo[3.2.0]hept-2-en-7-one	4613-37-0	555.98±15.86	2543.54±210.23	10256.1±1147.13	14358.39±266.79	15169.94±207.65	14720.39±762.75
22	Geranyl isobutyrate	2345-26-8	17.23±8.44	696.81±81.32	8497.46±922.85	12125.43±237.4	13465.06±223.37	14541.23±796.42
23	Ketone, methyl 2,2,3-trimethylcyclopentyl	17983-22-1	791.01±7.97	2599.24±212.84	9308.25±954.62	12824.08±291.25	13549.18±150.16	13039.52±541.76
24	cis-Chrysanthenol	55722-60-6	98.93±12.47	3472.94±214.64	12141.66±1079.06	13711.42±454.24	12969.24±234.89	12855.93±616.27
25	4-Acetyl-1,4-dimethyl-1-cyclohexene	43219-68-7	96.13±12.55	3398.56±219.02	12094.76±1085.62	13706.71±462.9	12953.05±221.39	12854.11±583.05
26	1-Nonen-4-ol	35192-73-5	711.78±17.11	2455.86±210.64	8750.82±926.66	12167.9±309.39	12872.15±192.71	12634.21±492.72
27	2-Cyclopentylethanol	766-00-7	33.66±1.91	4178.15±257.48	12445.58±1294.4	12263.56±197.68	13348.5±213.33	12193.17±677.84
28	(Z)-3-hexen-1-ol acetate	3681-71-8	21.76±0.57	3123.47±208.33	9458.97±1050.43	9233.44±118.6	10095.79±120.55	9103.27±510.26
29	2-Isopropyl-5-methylhex-2-enal	35158-25-9	526.25±1.11	1711.04±126.11	5535.13±486.37	7507.67±193.84	7916.95±74.19	7638.68±299.84
30	(Z)-6-Nonenal	2277-19-2	540.24±2.03	1735.65±127.56	5512.78±476.36	7485.59±191.35	7906.54±95.19	7634.56±311.38
31	α-Farnesene	502-61-4	13.58±4.69	408.3±48.59	4522±467.24	6377.68±122.2	7015.18±108.91	7574.61±377.8
32	Isobutyl tiglate	61692-84-0	517.94±10.23	1404.37±116.06	5039.28±577.71	7010.87±142.75	7428.75±124.96	7218.67±335.74
33	2,3-Epoxypinane	1686-14-2	350.69±2.71	1319.08±105.15	4921.83±528.89	6820.83±167.35	7316±94.62	7093.89±311.84
34	P-Hydroxybenzoic acid	99-96-7	5.25±2	243.36±31.33	3244.39±318.5	4670.48±109.91	5287.1±69.55	5838.05±337.05
35	Fenchone	1195-79-5	266.22±3.34	960.64±81.68	3840.25±435.02	5362.14±106.61	5697.88±72.1	5508.39±270.03
36	2-Methyl-1-phenyl-2-propanol	100-86-7	43.88±8.26	1383.73±86.23	4708.88±415.2	5344.77±197.44	5032.38±87.93	5036.69±235.87
37	Ipsenol	35628-05-8	246.82±1.88	890.57±72.3	3288.47±328.94	4588.76±103.91	4831.76±46.63	4673.43±180.6
38	4-Methyl-benzenemethanol	589-18-4	198.65±1.82	788.37±66.72	3164.02±350.56	4458.07±86.05	4752.34±67.6	4559.03±215.13
39	2-Methyl-5-(1-methylethyl)-1-cyclopentene-1-methanol	80113-82-2	22.91±1.17	465.98±41.39	1663.18±204.84	2836.15±134.93	2986.75±95.99	3040.24±163.89
40	(1α,2β,5α)-2-Methyl-5-(1-methylethenyl)-cyclohexanol	38049-26-2	30.79±2.07	461.97±43.4	1669.61±213.42	2834.14±124.9	3003.48±90.48	3030.65±163.39
41	1-Methyl-4-propan-2-ylidenecyclohexan-1-ol	586-81-2	23.9±2.44	460.49±41.29	1654.11±213.61	2828.82±143.87	2985.03±98.28	3028.72±170.07
42	2-Propylimidazole	50995-95-4	297.04±0.9	622.75±44.79	2000.85±230.13	2718.28±60.67	2863.11±41.17	2769.93±128.84
43	1-Ethenyl-2-pyrrolidinone	88-12-0	155.18±4.48	472.07±41.8	1638.11±177.71	2290.98±64.63	2430.14±50.06	2394.16±100.81
44	(Z)-3-Hexen-1-ol	928-96-1	-	701.41±76.75	2548.36±368.55	2454.77±106.64	2495.31±53.74	2362.72±85.01
45	Hygrine	496-49-1	154.72±4.68	417.91±33.56	1487.31±167.55	2071.33±39.9	2204.13±32.28	2138.68±105.56
46	1-(2-Hydroxyethyl)-1,2,4-triazole	3273-14-1	164.78±2.01	425.98±33.44	1472.19±168.45	2039.65±48.27	2160.02±31.08	2098.12±95.11
47	3-Methylbutyl 3-methylbutanoate	659-70-1	156.2±6.78	415.46±29.1	1459.64±163.88	2022.65±47.09	2141.23±34.63	2082.55±96.08
48	2,3-Dimethyl-5-ethylpyrazine	15707-34-3	14.92±0.72	62.29±6.19	1291.49±157.9	1396.22±63.12	1812.34±14.91	1945.91±81.31
49	Paroxypropione	70-70-2	-	151.55±18.75	1229.62±129.63	1802.41±127.98	1964.31±62.59	1893.75±95.3
50	Ethyl sorbate	2396-84-1	352.3±1.74	541.17±32.89	1414.7±153.34	1872.96±38.69	1960.61±18.22	1885.46±92.62
51	2(1H)-Pyridinone	142-08-5	348.55±7.56	521.95±30.17	1399.87±153.98	1861.94±44.61	1956.04±17.22	1878.39±91.06
52	Methyl 2-(methylamino)benzoate	85-91-6	-	196.4±26.96	1121.02±193.77	1615.82±125.8	1683.83±111.37	1704.48±113.65
53	2-Thiophenemethanethiol	6258-63-5	161.66±0.35	316.48±23.02	1010.58±116.12	1392.71±24.98	1472.07±26.53	1421.69±72.65
54	(E)-Hex-3-enyl butyrate	53398-84-8	8.07±0.9	35.39±4.82	1280.06±231.39	1126.41±71.92	1188.33±21.63	1123.51±79.2
55	E-2-Hexenyl benzoate	76841-70-8	-	-	605.99±93.07	1191.16±50.72	1023.91±75.35	1108.8±53.54
56	(E)-2-Hexenal	6728-26-3	-	387.42±32.12	1257.41±120.08	1229.23±26.43	1195.38±67.4	1080.78±39.13
57	cis-3-Hexenyl butyrate	16491-36-4	8.15±0.76	35.13±4.88	1255.16±229.49	1102.61±66.03	1125.98±23.86	1074.88±79.34
58	2-Methyl-3,5-diethylpyrazine	18138-05-1	3.99±0.79	179.94±11.19	875.82±101.12	1008.14±61.77	955.67±21.82	991.19±39.29
59	6-Methyloxan-2-one	823-22-3	74.54±1.61	206.13±16.81	664.26±64.39	908.57±23.95	961.76±11.04	931.66±37.38
60	3'-Methylacetophenone	585-74-0	5.78±0.82	134.09±13.7	508.13±65.29	875.27±34.91	927.05±24.15	923.41±51.49
61	cis-3-Hexenyl hexanoate	31501-11-8	-	5.29±0.9	704.04±137.68	791.82±43.08	892.23±28.44	921.09±83.25
62	cis-3-Hexenyl cis-3-hexenoate	61444-38-0	-	4.15±0.51	696.98±132.65	788.17±43.22	886.29±25.49	914.33±81.51
63	Hexyl benzoate	6789-88-4	-	-	603.07±63.07	994.46±47.28	887.37±6.42	894.71±38.97
64	Cashmeran	33704-61-9	313.72±68.85	319.41±32.2	651.64±190.4	649±51.46	701.45±94.1	777.28±70.91
65	2-Dimethylamino-4-methyl-pent-4-enenitrile	94492-10-1	1.45±0.12	241.85±14.16	757.2±86.55	732.15±9.7	806.58±6.84	722.94±43.71
66	Trans-Linalool oxide (furanoid)	34995-77-2	58.79±5.53	192.72±23.6	428.8±78.36	668.85±29.34	706.39±39.64	721.61±50.47
67	3-(Hydroxymethyl)nonan-2-one	67801-33-6	71.29±1.13	158.12±11.93	502.86±55.63	688.38±17.29	726.91±11.18	713.07±29.57
68	2-Bromo dodecane	13187-99-0	22.41±4.46	53.41±6.08	432.21±49.69	582.56±9.87	642.48±14.36	688.76±36.21
69	Neoisomenthol	491-02-1	4.48±0.74	20.87±2.74	781.23±143.11	694.88±41.88	709.33±16.21	683.24±49.6
70	Butanoic acid, 5-hexenyl ester	108058-75-9	4.65±0.69	20.94±2.74	780.96±139.87	682.18±45.73	708.36±15.41	681.24±49.57
71	Methoxyethyl acrylate	3121-61-7	-	192.56±31.06	708.99±91.39	686.68±16.19	696.17±10.83	645.27±28.85
72	2-Methoxy-3-isopropylpyrazine	25773-40-4	19.86±0.34	85.49±8.01	403.68±47.38	625.02±15.65	659±8.44	632.59±34.9
73	Thujone	546-80-5	76.08±4.68	133.59±11.44	437.73±47.51	610.43±12.52	642.99±7.37	622.75±31.81
74	Methyl cyclohexanecarboxylate	4630-82-4	-	204.1±13	611.56±67.06	599.13±12.88	658.05±9.77	597.95±37.49
75	Trans-Calamenene	73209-42-4	12.34±4.16	129.31±14.79	365.68±16.46	527.21±31.6	553.97±13.79	531.9±27.89
76	4-Hexen-3-one	2497-21-4	1.24±0.34	159.31±19.99	561.3±71.95	553.01±19.96	548.45±18.92	520.15±15.96
77	Isoterpinene	586-62-9	63.68±6.31	155.06±16.87	321.12±55.71	467.57±18.98	481.25±35.04	494.6±35.97
78	2-Nonenal	2463-53-8	29.44±3.48	173.11±9.22	418.41±30.38	469.89±18.85	459.11±8.17	458.2±16.41
79	(E)-6-Nonen-1-ol	31502-19-9	32.03±3.83	174.97±10.24	421.49±30.48	472.08±16.82	461.73±8.56	455.02±12.95
80	N,N-Dimethyl-benzenamine	121-69-7	16.75±0.78	66.36±5.9	285.86±31.07	396.15±5.36	422.68±3.68	399.34±20.74
81	Geranyl acetate	105-87-3	-	-	288.8±53.68	326.53±16.31	370.23±7.66	378.69±31.67
82	(1R,4S,6S)-1,3,3-Trimethyl-2-oxabicyclo[2.2.2]octan-6-yl acetate	57709-95-2	-	15.65±2.2	241.1±31.4	321.21±15.5	348.29±11.02	358.05±17.79
83	2,3,5-Trimethylpyrazine	14667-55-1	-	118.53±7.48	353.94±39.7	346.5±8.15	381.75±7.58	347.08±22.51
84	(E,E)-2,4-Heptadien-1-ol	33467-79-7	1.13±0.1	110.52±6.99	332.72±37.33	323.85±4.91	354.22±4.52	318.98±19.01
85	Metacetaldehyde	108-62-3	12.82±2.68	123.48±5.86	269.89±22.95	307.52±14.81	302.07±7.29	304.7±12.1
86	Acetaldehyde ethyl cis-3-hexenyl acetal	28069-74-1	40.96±0.85	78.87±6.04	219.39±24.05	292.64±5.84	305.39±6.01	299.95±15.28
87	3-Acetyl-2,5-dimethyl furan	10599-70-9	40.82±0.53	70.64±4.6	211.46±26.35	291.74±6.3	309.96±5.5	299.46±14
88	1-Phenylpentan-1-one	1009-14-9	0.07±0.01	11.49±1.4	183.79±32.5	245.09±12.49	273.78±11.42	292.61±20.26
89	Benzamide	55-21-0	-	20.62±3.13	177.19±20.06	261.35±12.24	288.47±9.59	285.65±12.09
90	3-(1-Methylethylidene)-cyclopentanecarbonitrile	89683-72-7	89.2±2.34	156.64±5.45	283.35±27.3	297.31±8.18	285.62±6.57	283.32±13.51
91	Cuparene	16982-00-6	0.97±0.27	12.36±1.17	154.62±16.77	231.83±1.5	256.47±0.5	280.61±15.17
92	Dicyclopentadiene	77-73-6	0.75±0.11	90.11±6.71	285.34±33.27	279.11±5.35	304.55±5.02	276.63±16.41
93	4-Acetylanisole	100-06-1	-	16.22±2	153.22±19.91	236.87±15.73	265.97±11.63	263.57±11.48
94	Octyl isobutyrate	109-15-9	-	19.75±1.69	149.31±17.25	220.18±12.02	244.68±15.34	248.61±19.26
95	6-Ethenyl-2,2,6-trimethyloxan-3-ol	14049-11-7	44.48±1.26	107.94±8.52	163.64±23.14	217.46±13.31	219.72±5.02	228.2±13.81
96	8-Methyl- exo-8-azabicyclo[3.2.1]octan-3-ol	135-97-7	0.57±0.18	21.5±3.94	196.34±39.82	185.26±15.23	226.7±5.29	221.68±24.06
97	2,2,3-Trimethylcyclobutanone	1449-49-6	-	65.2±10.48	242.6±32.5	235.37±8.77	234.11±5.35	216.77±11.35
98	3,6-Dimethyl-2,3,3A,4,5,7A-hexahydrobenzofuran	70786-44-6	3.26±0.4	32.13±2.9	112.4±15.87	191.92±8.5	202.96±3.62	207±10.92
99	(Z)-3-hexen-1-ol acetate	54814-64-1	-	10.25±1.54	111.55±12.31	160.56±6.51	183.22±1.25	199.49±9.38
100	6-Methylhept-5-en-2-one	110-93-0	8.76±0.86	41.96±3.22	161.72±21.96	189.69±8.13	201.15±9.78	199.43±14.67
101	3-Ethyl-2-methyl-hexane	16789-46-1	-	56.71±12.21	218.46±35.77	206.86±6.41	207.36±5.91	194.74±32.63
102	(2E,4S,7E)-4-Isopropyl-1,7-dimethylcyclodeca-2,7-dienol	198991-79-6	-	17.54±2.58	97.8±5.06	183.75±5.63	171.09±3.6	183.41±4.25
103	Ethyl 3-(2-furyl)propionate	10031-90-0	2.75±0.62	29.19±4.72	101.27±7.78	172.57±4.36	181.31±8.92	182.31±5.69
104	2-Methylisoborneol	2371-42-8	44.75±3.2	71.27±2.89	121.11±14.58	166.42±8.12	171.23±4.46	174.63±10.98
105	Anabasine	494-52-0	1.51±0.45	9.23±0.72	101.51±9.91	141±4.66	156.96±1.44	169.49±9.6
106	3-Imidazol-1-ylpropanenitrile	23996-53-4	44.91±1.96	81.18±3.03	161.46±14.66	175.99±7.8	168.33±2.15	168.06±7.92
107	α-Cubebene	17699-14-8	1.22±0.29	27.78±4.11	113.87±5.87	182.84±17.79	195.42±13.31	166.24±11.7
108	6-bis(Methylene)-1,7-Octadiene, 2,7-dimethyl-3	16714-60-6	23.2±0.32	58.02±5.24	114.34±17.1	163.12±5.96	164.56±11.27	165.51±11.29
109	(Z)-2-Decenal	2497-25-8	43.18±7.86	67.88±8.7	118.57±18.59	130.55±6.33	149.46±6.86	160.79±19.07
110	Piperitenone	491-09-8	-	10.56±1.17	96.78±11.71	143.06±8.62	157.57±6.79	159.48±6.7
111	(E)-Bergamotene	15438-94-5	8.43±1.45	29.18±2.14	121.29±4.64	151.33±8.06	156.35±2.65	156.65±9.74
112	Tropine	120-29-6	1.98±0.35	13.66±2.1	130.91±27.58	142.02±11.39	152.61±5.68	145.33±16.18
113	4,5-Dimethylbenzene-1,3-diol	527-55-9	65.8±16.81	61.12±11.24	144.16±45.08	110.58±13.64	127.37±6.13	138.48±9.95
114	2-Methylundecane	7045-71-8	15.82±2.93	40.26±3.83	123.66±12.93	122.33±7.07	118.24±4.01	134.24±8.79
115	(E)-2-Methylbut-2-en-1-yl methacrylate	88142-95-4	14.91±1.14	37.48±4.68	76.52±12.96	113.69±5.86	118.6±6.99	120.36±7.79
116	Isopinocarveol	6712-79-4	1.24±0.17	4.32±0.73	135.47±23.22	117.72±8.13	123.62±1.35	118.62±8.33
117	Cyclohexanol, 1-methyl-4-(1-methylethylidene)-, acetate	10235-63-9	-	6.4±0.28	60.71±6.92	91.61±7.01	100.7±3.72	101.02±4.25
118	Neral nitrile	31983-27-4	1.3±0.25	4.31±0.38	64.38±15.09	70.94±4.5	94.14±6.2	97.71±11.15
119	Isopulegone	529-00-0	1.24±0.19	3.62±0.7	109.75±19.91	95.31±5.17	100.38±1.62	95.87±8.25
120	Propyl caproate	626-77-7	7.51±0.45	24±1.51	78.74±5.83	104.19±4.19	109.75±2.7	94.86±4.28
121	Hexanoic acid, 5-hexenyl ester	108058-81-7	-	-	64.42±14.15	74.56±5.27	89.27±10.24	94.64±9.1
122	(Z,E)-α-Farnesene	26560-14-5	5.35±0.96	16.91±1.72	71.23±1.79	88.17±5.27	90.48±2.23	88.8±5.2
123	2-Chloroethyl methacrylate	1888-94-4	7.19±1.05	20.59±1.89	67.17±9.76	77.57±4.44	84.45±7.53	86.12±7.74
124	2-Heptenoic acid	18999-28-5	10.71±0.41	29.94±2.87	56.9±9.19	81.9±3.74	85.28±2.65	84.86±5.27
125	1-Methoxy-2-nitro-benzene	91-23-6	-	2.79±0.39	52.04±9.61	68.32±3.58	77.21±4.21	82.58±5.9
126	2,6-Dimethyl-2-cis-6-octadiene	2792-39-4	6.38±1.03	18.48±1.91	63.4±10	75.29±4.38	81.07±6.16	82.2±6.66
127	3,5-Dimethyl-1-nutylpyrazole	2655-37-0	2.18±0.49	11.28±1.15	41.79±6.3	75.79±7.22	77.49±3.96	80.69±8.89
128	Ethyl trans-4-decenoate	76649-16-6	-	5.39±0.66	48.2±6.17	73.37±4.41	80.46±3.78	80.22±4.76
129	L-α-Terpineol	10482-56-1	32.56±2.3	43.75±5.24	60.52±11.98	72.03±5.17	75.67±4.81	79.69±6.54
130	β-Guaiene	88-84-6	1.16±0.22	7.97±0.75	47.6±2.28	72.73±2.35	74.54±3.36	78.93±9.2
131	Ethyl (methylthio)acetate	4455-13-4	-	25.21±1.77	79.69±9.45	77.85±1.29	85.75±1.69	78.78±4.3
132	3-Methoxy-benzaldehyde	591-31-1	-	16.28±1.12	45.13±5.7	73.32±2.94	76.05±5.57	77.88±2.94
133	Bicyclosesquiphellandrene	54324-03-7	0.96±0.3	6.31±0.93	39.82±0.71	62.44±2.69	64.23±1.86	68.73±2.82
134	2-(1-Methyl-2-prop-1-en-2-ylcyclobutyl)ethanol	30820-22-5	1.19±0.4	3.36±0.51	79.28±14.68	68.34±4.63	73.93±4.61	68.59±5.14
135	Isomaltol	3420-59-5	2.82±0.34	14.49±1.2	53.84±6.82	64.14±2.77	69.45±2.77	67.87±4.09
136	(1R,2R,4S,6S,7S,8S)-8-Isopropyl-1-methyl-3-methylenetricyclo[4.4.0.02,7]decan-4-ol	124753-76-0	-	-	40.42±7.98	59.26±5.11	66.88±2.37	67.65±7.54
137	Myrtenal	564-94-3	3.7±0.62	16.63±0.32	41.07±3.91	66.03±2.8	66.81±1.78	65.37±2.3
138	Myrtenol	515-00-4	3.85±0.29	12.65±1.88	38.51±3.71	63.74±3.74	64.57±0.17	65.04±3.54
139	Hordenine	539-15-1	1.15±0.05	4.35±0.45	39.57±4.52	55.92±1.51	60.55±0.47	64.72±3.44
140	3-Ethyl-3-methyl-decane	17312-66-2	1.21±0.3	7.27±1.31	57.74±12.35	62.69±4.91	66.12±2.88	63.1±6.18
141	cis-Dihydrocarvone	3792-53-8	14.62±1.19	23.59±1.08	43.47±5.75	61.28±3.12	62.52±2.36	63.02±2.65
142	2,5-Dimethyl-nonane	17302-27-1	-	22.03±1.41	61.47±6.24	59.39±0.96	66.22±0.33	60.17±4.1
143	Levomenthol	2216-51-5	23.73±2.99	36.48±4.47	51.3±5.24	54.57±3.45	60.78±0.52	59.01±3.73
144	2-Methoxy-phenol	90-05-1	10.5±0.16	22.23±2.41	40.98±5.13	53.4±3.28	57.33±0.85	57.87±2.51
145	4A,8-Dimethyl-2-(Prop-1-En-2-Yl)-1,2,3,4,4A,5,6,7-octahydronaphthalene	103827-22-1	0.52±0.2	5.68±0.5	30.95±1.38	50.12±2.64	53.24±1.41	53.1±4.67
146	β-Pinene	127-91-3	-	6.94±0.82	35.35±5.97	43.29±0.99	49.09±3.55	52.54±4.53
147	cis-Calamenene	72937-55-4	1.03±0.15	11.03±1.51	37.95±0.49	56.29±1.91	57.76±3.76	49.77±2.2
148	(1R,3As,8As)-7-Isopropyl-1,4-dimethyl-1,2,3,3A,6,8A-hexahydroazulene	36577-33-0	0.34±0.07	4.4±0.78	38.79±9.64	44.9±1.84	48.23±1.48	49.1±8.11
149	2,9-Dimethylundecane	17301-26-7	3.59±0.74	11.08±2.08	46.26±8.4	42.17±2.98	49.23±1.72	47.77±3.5
150	N-Butyl-1-(pyridin-2-yl)methanimine	7032-24-8	-	6.85±0.62	24.84±3.34	38.54±3.18	45.52±3.33	46.5±8.87
151	5-(Tetrahydro-2h-pyran-2-yloxy)-1-pentanol	76102-74-4	15.65±2.4	31.33±2.71	39.08±8.17	42.76±5.08	47.01±5.19	46.28±0.76
152	(E)-4,8-Dimethylnona-1,3,7-triene	19945-61-0	9.97±0.45	18.5±2.39	40.38±10.94	38.5±4.76	53.45±6.91	46.16±8.67
153	(E)-2-Tetradecene	35953-54-9	5.29±1.06	16.63±2.07	28.64±4.36	35.82±2.17	43.3±0.74	46.1±5.43
154	1-Adamantanol	768-95-6	-	3.71±0.47	27.44±3.11	40.5±2.19	44.6±1.47	43.67±1.38
155	1-Methyloctyl butyrate	69727-42-0	15.45±2.05	27.13±3.46	35.71±3.41	36.36±2.5	40.76±1.49	40.38±3.09
156	4,4-Dimethyl-undecane	17312-68-4	0.9±0.04	3.81±0.51	34.79±7.45	38.12±3.21	40.68±1.73	39.22±4.09
157	2-Methyl-6-methylideneocta-1,7-diene	1686-30-2	1.19±0.13	7.98±0.44	29.26±4.79	34.74±2.65	38.03±2.66	38.83±3.02
158	Tridecane	629-50-5	14.59±2.05	25.44±3.07	36.1±4.68	35.28±2.34	41.77±0.44	38.66±2.9
159	2,3,5-Trimethyldecane	62238-11-3	14.51±2.51	25.55±2.84	34.83±4.19	34.27±2.43	39.62±0.57	38.56±3.1
160	2-Octanol	123-96-6	-	12.59±0.84	37.55±3.9	36.76±1.28	40±1.34	38.04±2.69
161	2-Hex-2-enylcyclopentan-1-one	34687-46-2	12.81±2.14	20.27±2.98	34.15±5.81	30.71±2.14	36.11±0.97	35.59±2.52
162	2-(2-Hydroxyethoxy)ethanol 1-nitrate	20633-16-3	1.82±0.25	7±0.94	19.62±2.84	31.46±1.04	33.56±0.51	33.96±1.6
163	5,5-Dimethyl-2-pyrazoline	4320-85-8	3.63±0.49	9.45±1.07	27.6±3.46	30.96±1.09	33.07±1.32	33.15±2.71
164	Hexa-2,4-diyn-1-ylbenzene	520-74-1	0.41±0.1	1.69±0.14	18.67±1.67	27.29±1.27	30.76±0.97	32.68±1.05
165	1-Iodoundecane	4282-44-4	13±2.02	21.25±2.11	28.32±4.2	27.15±0.63	32.72±1.46	32.37±2.4
166	3-Methyl-3-(4-methylpent-3-en-1-ul)oxirane-2-carbaldehyde	16996-12-6	0.61±0.1	4.02±0.69	26.69±5.76	26.51±1.71	32.48±1.03	31.71±3.55
167	(2R,2'R,5'S)-Lilac aldehyde	53447-47-5	7.9±0.47	15.3±1.35	23.35±2.76	29.06±1.4	29.91±1.25	30.2±1.93
168	3-Pinanone; 2,6,6-trimethylbicyclo[3.1.1]heptan-3-one	15358-88-0	7.87±0.91	12.34±1.18	22.02±2.72	28.31±1.93	28.9±2.01	29.54±1.94
169	Heptanoic acid	111-14-8	3.13±0.22	9.14±1.03	19.58±3.08	29.19±1.58	29.73±1.14	29.35±2.47
170	(5R,10R)-10-Methyl-6-methylene-2-(propan-2-ylidene)spiro[4.5]dec-7-ene	28908-27-2	-	3.89±0.31	18.79±0.59	26.97±1.66	29.01±0.87	28.65±1.9
171	Isocyclocitral	1335-66-6	-	8.03±0.4	27.12±2.94	30.1±1.44	28.59±0.64	28.42±1.24
172	2,6-Octadienoic acid, 3,7-dimethyl-, methyl ester	2349-14-6	10.8±1.38	17.2±2.54	25.83±4.76	22.44±0.88	27.71±1.21	27.89±2.16
173	Benzyl formate	104-57-4	1.97±0.28	5.73±0.59	15.53±2.88	23.68±2.01	26.34±1.47	27.52±1.61
174	(Z)-3-Octen-1-ol	20125-84-2	11.73±0.82	18.44±2.94	24.1±1.63	23.93±2.96	30.45±1.52	27.06±1.93
175	Ethanethioic acid, S-(2-furanylmethyl) ester	13678-68-7	6.14±0.14	13.95±1.2	19.72±2.13	26.6±2.19	26.65±0.73	26.83±1.32
176	Benzophenone	119-61-9	-	2.75±0.36	14.18±0.34	24.93±0.99	26.34±0.94	26.47±2.23
177	1,2,4-Benzenetriol	533-73-3	0.59±0.14	2.15±0.41	15.18±1.58	21.23±1.35	24.15±0.26	26.14±1
178	1,2,3,4-Tetrahydro-3-isopropyl-5-methyl-1-oxonaphthalene	29107-42-4	-	3.48±0.32	13.92±3.62	21.72±1.28	27.31±0.9	25.59±0.69
179	Trans,cis-2,6-Nonadien-1-ol	28069-72-9	7.8±1.07	15.32±1.4	21.17±1.84	25.24±1.1	25.69±0.64	24.65±1.53
180	(6Z)-Nonen-1-ol	35854-86-5	9.05±1.72	17.86±2.05	20.79±1.49	24.81±1.47	25.21±0.64	24.53±1.65
181	1,4-Epoxyoctane	1004-29-1	-	7.21±0.58	24.77±2.71	24.12±0.23	26.5±1.01	23.74±1.59
182	1,2-Epoxy-p-menthane-3-one	5286-38-4	9.1±1.06	13.45±0.37	19.21±6.47	18.55±4.19	21.82±1.99	23.51±2.59
183	Acetophenone	98-86-2	6.06±0.96	12.25±1.57	16.77±3.4	21.42±1.99	25.47±1.77	22.93±1.04
184	2,6-Dimethyl-3,7-octadiene-2,6-diol	13741-21-4	4.63±0.48	8.64±0.75	16.02±1.54	20.99±0.55	22.92±0.33	20.96±0.33
185	(+)-Neodihydrocarveol	18675-33-7	0.9±0.11	3.15±0.37	17.69±3.4	18.4±1.45	19.17±0.99	20.47±3.43
186	(E)-2,6-Dimethylocta-3,7-diene-2,6-diol	51276-34-7	5.12±0.51	8.75±0.74	15.97±1.5	20.48±0.87	22.1±0.63	19.92±1.99
187	2,3-Dihydro-1H-inden-5-ol	1470-94-6	-	1.22±0.18	11.27±2.48	16.57±1.96	18.15±0.39	19.14±1.46
188	2-N-pentylthiophene	4861-58-9	2.78±0.23	8.07±0.69	11.44±0.85	15.74±1.08	16.71±0.2	17.45±0.84
189	(+)-Isopinocampheol	27779-29-9	1.26±0.21	3.64±0.32	18.95±2.9	17.02±1.05	18.13±0.46	16.76±1.34
190	Butanoic acid, anhydride	106-31-0	5.76±0.49	9.14±1.3	12.34±1.51	16.41±2.48	19.19±0.74	16.53±1.71
191	Iso-3-thujyl acetate	62181-90-2	-	1.88±0.58	10.97±1.99	15.63±0.5	16.79±1.19	16.37±1.2
192	3-Nitro-phenol	554-84-7	0.33±0.06	0.96±0.06	9.1±1.15	13.09±0.49	14.42±0.51	15.42±1.36
193	2,5,9-Trimethyl-decane	62108-22-9	5.39±0.62	8.3±1.23	11.46±1.47	14.59±1.64	17.69±0.24	15.38±1.71
194	(E,E)-2,4-Decadienal	25152-84-5	0.48±0.08	2.13±0.42	12.93±2.92	13.46±0.47	14.92±0.76	14.75±1.52
195	1-Ethenyl-3,5-dimethyl-benzene	5379-20-4	1.96±0.25	3.65±0.32	10.64±0.08	15.5±2.2	14.86±0.64	14.54±0.63
196	p-Cresol	106-44-5	-	2.08±0.25	8.4±1.62	11.94±0.47	14.42±0.72	14.51±1.7
197	4-(2-Propenyl)-phenol	501-92-8	2.3±0.28	3.95±0.36	9.38±1.84	12.2±1.06	13.51±0.99	14.32±1.45
198	Hexyl butanoate	2639-63-6	0.61±0.03	4.2±0.54	9.57±0.81	12.7±2.1	13.45±1.2	14.08±1.8
199	4,8-Dimethyl-tridecane	55030-62-1	0.87±0.09	3.71±0.6	9.23±1.61	12.68±0.8	13.42±0.48	13.34±1.27
200	N-Methyl-1-octanamine	2439-54-5	2.15±0.37	4.21±0.1	8.42±1.15	12.76±1.47	12.67±1.36	12.95±2.9
201	1-Iodo-decane	2050-77-3	4.35±0.29	7.52±1.24	10.7±1.75	11.18±1.29	12.96±0.24	12.82±0.95
202	Geranic acid	459-80-3	1.41±0.19	3.7±0.63	8.27±2.84	10.06±0.55	11.82±0.83	12.81±1.04
203	6-Dimethyl-(1α,4α,4Aα,5Aα)-1,4-methano-1H-cyclopropa[d]pyridazine, 4,4A,5,5A-tetrahydro-6	109746-10-3	1.13±0.53	4.79±0.53	8.72±1.57	10.72±0.66	10.71±0.96	12.66±1.44
204	N-Decyl ethanoate	112-17-4	3.87±0.65	5.71±0.53	10.16±1.67	11.1±0.51	12.03±0.93	12.59±1.81
205	3-Nonen-5-one	82456-34-6	4.78±0.8	7.18±1.48	10.36±0.7	10.79±1.39	13.28±0.35	12.21±0.97
206	3-Methyl-phenol	108-39-4	1.19±0.53	-	8.21±1.29	11.57±3.74	12.23±0.7	12.2±1.61
207	M-Aminophenylacetylene	54060-30-9	-	2.54±0.23	7.58±1.15	12.67±0.04	14.03±0.8	12.18±0.82
208	Ethyl enanthate	106-30-9	3.62±0.25	4.99±0.44	10±1.22	12.03±0.56	12.53±0.4	12.07±0.46
209	2,2,5-Trimethylpiperidin-3-one	103634-57-7	4.7±0.43	7.03±1.13	10.8±1.29	10.1±0.68	11.76±0.13	11.57±0.99
210	cis-p-Menthan-1-ol	3901-95-9	0.81±0.14	2.87±0.45	10.69±2.7	10.79±0.72	12.3±1.02	11.48±0.93
211	Prenyl caproate	76649-22-4	0.88±0.23	5.09±0.72	10.46±1.5	10.25±0.66	10.57±0.09	10.7±1.29
212	2-Phenoxyethyl isobutyrate	103-60-6	-	1.77±0.51	7.81±0.36	10.11±0.79	10.32±0.3	10±0.49
213	Cadina-1(10),6,8-triene	1460-96-4	0.16±0.1	1.59±0.21	5.14±0.08	8.73±0.08	9.07±0.07	9.68±0.75
214	Methyl furfuryl disulfide	57500-00-2	0.57±0.09	0.73±0.04	8.04±1.8	8.62±0.67	10.15±0.24	9.57±1.34
215	2,6,10,14-Tetramethyl-pentadecane	1921-70-6	1.4±0.51	2.65±0.25	6.58±1.85	7.11±0.39	8.33±0.88	9.53±0.85
216	3,5,5-Trimethyl-1-hexanol	3452-97-9	3.88±0.63	6.21±0.96	8.09±0.66	8.42±0.9	10.23±0.41	8.93±0.76
217	2-Octenoic acid	1470-50-4	-	-	9.4±1.86	8.58±0.46	8.73±0.02	8.79±1.14
218	10-Undecenal	112-45-8	2.42±0.41	4.57±0.66	7.1±0.51	7.4±0.92	9.14±0.31	8.58±0.46
219	2-Methylene-4,8,8-trimethyl-4-vinylbicyclo[5.2.0]nonane	242794-76-9	-	0.81±0.05	6.34±1.21	8.36±0.74	8.39±0.59	8.33±0.26
220	Camphene hydrate	465-31-6	2.76±0.39	4.91±0.52	6.07±1.04	7.02±0.8	9.18±0.23	7.87±0.89
221	3-Thujanone	1125-12-8	1.4±0.28	1.96±0.19	6.06±1.27	6.57±0.61	8.36±0.6	7.74±1.1
222	Trans-2-Methyl-2-pentenoic acid	3142-72-1	2.13±0.31	3.67±0.76	5.53±0.35	6.31±0.36	7.52±0.67	7.71±1.29
223	(Z)-3-Octen-1-ol acetate	69668-83-3	2.06±0.34	2.55±0.22	5.27±1.12	7.63±0.38	7.94±0.47	7.69±0.25
224	3-Ethyl-benzaldehyde	34246-54-3	-	2.5±0.19	6.59±0.64	7.98±0.36	7.87±0.34	7.52±0.57
225	2-(4-Chloro-phenylamino)-ethanol	2933-81-5	-	-	3.86±0.46	6.17±0.13	6.41±0.3	6.97±0.26
226	3-Methylcoumarin	2445-82-1	-	0.96±0.38	6.16±0.08	7.43±1.25	7.31±0.67	6.66±0.24
227	1-(p-Anisyl)-3-methyl-1-pentanone	66333-82-2	-	0.56±0.05	4.23±0.27	5.49±0.77	5.73±0.54	6.44±0.74
228	2,5-Dibutoxy-2,5-dihydrofuran	20295-23-2	1.74±0.16	2.96±0.34	4.95±1.07	5.17±0.31	5.89±0.09	6.32±0.76
229	Heptyl acetate	112-06-1	1.87±0.11	2.69±0.5	4.39±0.83	6.33±0.44	7.68±0.58	6.29±0.97
230	4-Ethyl-2-methoxy-phenol	2785-89-9	0.24±0.07	2.89±0.28	6.15±1.05	6.1±0.42	6.35±0.81	6.27±0.56
231	Pentan-2-yl octanoate	55193-30-1	2.25±0.13	3.8±0.53	5.05±0.77	5.36±0.12	6.16±0.16	6.09±0.62
232	Ethyl geranate	32659-21-5	-	2.12±0.14	5.31±0.37	7.17±0.75	8.15±1.26	5.98±0.39
233	2,6,6-Trimethylcyclohex-2-ene-1-carbaldehyde	432-24-6	1.01±0.22	1.32±0.2	4.61±1.31	5.87±0.7	7.04±0.63	5.79±0.33
234	1-Methyl-2-nitro-benzene	88-72-2	0.85±0.16	2.6±0.17	5.83±0.78	5.54±0.09	5.72±0.57	5.66±0.26
235	3-Mercaptohexanol	51755-83-0	0.83±0.22	1.53±0.34	3.72±0.75	4.35±0.6	5.23±0.63	5.59±0.39
236	Methyleugenol	93-15-2	-	0.46±0.1	2.94±1.31	4.17±0.55	4.7±0.88	5.38±0.68
237	Ipsdienol	35628-00-3	1.86±0.25	3.22±0.34	4.2±0.35	4.83±0.67	6.23±0.15	5.26±0.53
238	2-Ethyl-1-hexanol	104-76-7	1.75±0.28	3.75±0.08	4.08±0.33	5.24±0.41	6.08±0.2	5.13±0.3
239	Octanoic acid	124-07-2	-	0.35±0.08	5.15±1.13	4.46±0.27	4.77±0.35	4.91±0.59
240	Citronellol	106-22-9	1.19±0.16	1.92±0.24	4.27±1.52	3.68±0.26	4.65±1.07	4.89±0.77
241	α-Calacorene	21391-99-1	0.27±0.03	1.53±0.26	3.68±0.43	4.65±0.17	4.81±0.24	4.59±0.23
242	3,5-Dimethyl-2-ethylpyrazine	13925-07-0	1.2±0.16	2.31±0.16	3.4±0.6	4.25±0.25	4.07±0.29	4.49±1.17
243	o-Hydroxybiphenyl	90-43-7	-	0.84±0.04	2.7±0.3	3.69±0.32	4.11±0.13	4.4±0.19
244	(E,Z)-2,6-Nonadienal	557-48-2	1.08±0.09	1.92±0.13	2.96±0.46	3.6±0.38	4.2±0.25	4.37±0.4
245	P-Menth-1-en-9-al	29548-14-9	0.39±0.02	1.61±0.2	2.56±0.95	3.37±0.19	3.55±0.51	4.09±1.01
246	3-Phenylpropyl isobutyrate	103-58-2	0.17±0.08	0.93±0.08	2.95±0.46	4.07±0.21	3.61±0.53	3.87±0.42
247	1,E-11,Z-13-Hexadecatriene	80634-97-5	-	-	2.64±1.35	8.65±0.82	6.01±1.98	3.77±0.73
248	(-)-Menthone	89-80-5	1.55±0.17	2.49±0.23	2.88±0.47	3.42±0.37	4.14±0.06	3.71±0.34
249	Ethyl hexahydrobenzoate	3289-28-9	0.42±0.01	0.85±0.16	2.88±0.36	2.34±0.23	2.72±0.26	3.38±0.37
250	4-(2,6,6-Trimethyl-2-cyclohexen-1-yl)-2-butanone	31499-72-6	-	-	2.3±0.41	3.58±0.3	3.2±0.16	3.38±0.14
251	N-Pentyl methylphosphonofluoridate	13454-59-6	0.96±0.13	1.64±0.25	2.55±0.34	3.04±0.22	3.13±0.38	3.24±0.25
252	(2E)-2-(Acetylhydrazono)propanoic acid	64096-81-7	0.86±0.14	1.57±0.12	2.32±0.15	2.7±0.15	2.89±0.3	3.19±0.08
253	Ethyl cyclohexanepropionate	10094-36-7	-	0.17±0.03	1.74±0.09	2.9±0.23	3.16±0.16	3.07±0.11
254	P-Menth-1-en-9-ol	18479-68-0	0.16±0.03	0.19±0.05	2.31±0.69	2.96±0.66	2.92±0.21	2.97±0.17
255	6,7-Dimethyl-1,2,3,5,8,8A-hexahydronaphthalene	107914-92-1	-	1.11±0.14	2.5±0.24	2.05±0.18	2.4±0.79	2.91±0.11
256	1-(5-Dimethylethyl)pyrazin-2-yl-ethan-1-one	182306-61-2	-	0.46±0.12	2.2±0.07	2.78±0.13	2.89±0.2	2.73±0.26
257	Diethylpropion	90-84-6	0.21±0.06	0.47±0.05	2.03±0.08	2.53±0.15	2.5±0.25	2.64±0.2
258	Triacetin	102-76-1	-	0.27±0.02	2.02±0.46	2.78±0.2	2.81±0.25	2.58±0.15
259	5-Hexyldihydro-4-methyl-trans-2(3H)-furanone	147254-33-9	0.53±0.12	1.18±0.21	1.83±0.42	2.01±0.09	2.55±0.08	2.19±0.17
260	5-Ethenyl-4-methylthiazole	1759-28-0	-	0.59±0.08	1.21±0.2	1.4±0.12	1.64±0.18	2.04±0.21
261	6,10-Dimethylundecan-2-one	1604-34-8	0.32±0.08	0.5±0.03	1.55±0.29	1.68±0.16	1.71±0.19	2.04±0.19
262	Isobutyl hexanoate	105-79-3	0.7±0.01	1.19±0.11	1.45±0.33	1.79±0.14	2.16±0.21	1.92±0.17
263	Hydroquinone	123-31-9	-	0.61±0.18	1.14±0.25	1.06±0.1	1.07±0.14	1.73±0.76
264	2-Propenoic acid, 2-methyl-, 3,3,5-trimethylcyclohexyl ester	7779-31-9	-	0.69±0.05	1.42±0.05	2.08±0.31	2.12±0.21	1.72±0.28
265	4',7',7'-Trimethyl-dispiro[1,3-dioxolane-2,2'-bicyclo[2.2.1]heptane-3',2''-(1'',3''-dioxolane)]	24022-14-8	-	-	1.03±0.52	1.1±0.25	1.23±0.26	1.71±0.22
266	5-(Acetyloxy)dihydro-5-methyl-2(3H)-furanone	57681-51-3	0.5±0.04	0.7±0.14	1.59±0.22	1.59±0.04	1.84±0.12	1.69±0.09
267	(-)-Geosmin	19700-21-1	0.56±0.08	0.89±0.24	1.39±0.21	1.39±0.05	1.73±0.08	1.71±0.05
268	1-Octen-3-yl butyrate	16491-54-6	0.56±0.08	0.98±0.24	1.54±0.21	1.66±0.2	1.73±0.4	1.66±0.5
269	N-Methyl-3,4-methylenedioxyamphetamine	42542-10-9	-	-	0.95±0.21	1.31±0.19	1.62±0.05	1.63±0.28
270	Dihydromyrcenol	18479-58-8	-	0.57±0.11	1.25±0.2	1.62±0.19	1.65±0.05	1.59±0.28
271	1H-Imidazole-4-methanol	822-55-9	0.66±0.03	1.09±0.11	1.37±0.18	1.45±0.13	1.84±0.16	1.61±0.06
272	Methyl laurate	111-82-0	-	0.24±0.05	0.91±0.11	1.33±0.14	1.62±0.11	1.55±0.16
273	Ar-himachalene	19419-67-1	-	0.24±0.02	0.87±0.23	1.37±0.14	1.52±0.18	1.54±0.27
274	2-Ethylpiperidine	1484-80-6	0.21±0.04	0.36±0.1	1.01±0.11	1.04±0.19	1.11±0.24	1.49±0.17
275	2,5-Di-tert-butyl-1,4-benzoquinone	2460-77-7	0.07±0.03	0.31±0.1	1.02±0.12	1.08±0.09	1.23±0.24	1.47±0.24
276	2-Furaldehyde diethyl acetal	13529-27-6	0.68±0.04	0.99±0.04	1.2±0.17	1.79±0.19	1.86±0.52	1.41±0.07
277	7-Methyl-heptadecane	20959-33-5	0.23±0.13	0.39±0.04	0.96±0.45	1.05±0.13	1.38±0.2	1.32±0.35
278	(E,E)-2,4-Nonadienal	5910-87-2	0.49±0.06	0.74±0.27	1.29±0.29	1.59±0.22	1.35±0.24	1.24±0.09
279	1,1'-Oxybis-octane	629-82-3	0.15±0.07	0.24±0.11	0.92±0.34	0.83±0.33	1.31±0.16	1.24±0.14
280	Thioacetylthioglycolic acid	17930-82-4	-	-	0.9±0.04	1.24±0.13	1.23±0.12	1.21±0.11
281	Petasitene	443124-67-2	0.12±0.06	0.15±0.03	0.76±0.13	0.7±0.11	1.3±0.28	1.06±0.2
282	Dimethyl (2S)-2-acetamidobutanedioate	57289-64-2	-	0.13±0.02	0.6±0.08	1.06±0.1	0.83±0.15	0.96±0.06
283	1,8-Dimethyl naphthalene	569-41-5	0.31±0.17	0.3±0.03	0.57±0.17	0.74±0.18	0.76±0.05	0.73±0.1

## Sheet: Table S3
Table S3. The content of differential VOCs in subclass 2
No.	Volatile compounds	CAS	Content (ug/kg)
			BT	R1	R2	R3	R4	T1
1	1,3-Dimethyl-benzene	108-38-3	144.35±3.75	191.05±25	167.6±17.76	100.27±7.77	106.96±0.5	95.32±8.95
2	Naphthalene	91-20-3	114.4±2.5	74.94±5.55	56.99±6.65	29.63±1.25	28.52±0.96	24.57±1.78
3	1,3,8-P-Menthatriene	18368-95-1	33.3±2.51	48.57±8.41	51.38±10.49	13.78±0.7	16.35±1.22	13.62±1.51
4	1,2,3,5-Tetramethyl-benzene	527-53-7	33.78±2.3	52.63±6.35	54.85±8.65	13.82±0.81	17.28±1.04	13.45±1.18
5	Trans-o-Dithiane-4,5-diol	14193-38-5	25.08±5.54	13.46±1.61	15.08±3.17	13.47±0.91	11.86±0.31	12.9±0.34
6	3-Carene	13466-78-9	10.2±0.5	14.46±1.61	20.06±3.08	14.97±2.57	12.15±1.36	10.05±1.54
7	2-Ethyl-1,4-dimethyl-benzene	1758-88-9	9.06±0.8	14.41±2.19	15.53±2.57	6.61±0.46	8.74±0.28	7.12±0.72
8	2-Methylhepta-1,5-diene	41044-64-8	14.57±1.79	17.45±1.81	8.42±1.61	6.17±0.35	6.27±0.85	6.58±1.37
9	1,2,4,5-Tetramethyl-benzene	95-93-2	11.71±0.63	18.65±2.6	19.15±2.8	5.82±0.75	7.96±0.37	6.39±1.13
10	1-Octene	111-66-0	14.68±1.53	17.81±2.21	7.44±0.08	5.49±0.32	7.06±2.01	5.92±1.08
11	Anethole	104-46-1	-	6.25±1.56	4.19±1.88	3.23±0.48	2.78±0.51	3.98±0.92
12	1-Methyl-3-(1-methylethenyl)-benzene	1124-20-5	7.51±0.63	8.46±0.32	6.63±0.66	4.38±0.21	4.18±0.31	3.82±0.34
13	Trans-Anethole	4180-23-8	-	7.64±0.82	5.11±1.67	3.1±0.61	2.75±0.15	3.57±1.1
14	Linalyl formate	115-99-1	1.47±0.15	4.53±0.93	3.42±0.05	3.19±0.23	3.48±0.6	3.05±0.35
15	3-Methoxy-2,5-dimethylpyrazine	19846-22-1	1.65±0.14	3.87±0.22	3.21±0.18	2.68±0.18	2.89±0.22	2.73±0.38
16	2-Methyl-propanoic acid	79-31-2	0.7±0.01	326.01±41.18	5.83±0.23	1.96±0.14	3.12±0.11	2.34±0.74
17	2,3,3-Trimethyl-octane	62016-30-2	3.1±0.32	2.44±0.32	2.11±0.11	1.85±0.18	2.18±0.29	1.67±0.25
18	(R)-(+)-1-(P-Tolyl)Ethylamine	4187-38-6	1.63±0.38	3.2±0.27	1.93±0.67	1.49±0.11	1.53±0.32	1.53±0.4
19	2-Ethyl-benzaldehyde	22927-13-5	0.92±0.05	5.01±0.3	2.14±0.61	1.72±0.24	1.82±0.24	1.49±0.11
20	Propan-2-yl benzoate	939-48-0	0.76±0.07	1.69±0.15	1.02±0.45	0.62±0.21	0.84±0.24	0.92±0.07
21	cis-2-(2-Pentenyl)furan	70424-13-4	0.66±0.14	1.17±0.17	0.85±0.22	0.46±0.12	0.54±0.05	0.87±0.1
22	7-Oxabicyclo[4.1.0]heptane	286-20-4	1.08±0.13	1.59±0.3	0.97±0.06	0.96±0.21	0.94±0.24	0.84±0.15
23	Methyl caproate	106-70-7	-	3.45±0.52	0.97±0.22	0.59±0.24	0.64±0.07	0.82±0.15
24	(1-Methylethyl)-benzene	98-82-8	1±0.15	1.39±0.26	1.25±0.28	0.54±0.01	0.68±0.23	0.79±0.19
25	7-Methyl-3-methylideneoct-6-enal	55050-40-3	0.72±0.15	1.3±0.17	0.92±0.33	0.65±0.11	0.93±0.32	0.73±0.24
26	Eucalyptol	470-82-6	0.44±0.07	1.18±0.09	0.93±0.25	1.15±0.12	0.98±0.18	0.6±0.17
27	Acetoacetic acid isoamyl ester	2308-18-1	1.31±0.12	1.63±0.35	1.42±0.39	0.67±0.29	0.56±0.09	0.46±0.16
28	(Z)-2-Penten-1-ol	1576-95-0	-	210.31±21.25	-	-	-	-

## Sheet: Table S4
Table S4. The content of differential VOCs in subclass 3
No.	Volatile compounds	CAS	Content (ug/kg)
			BT	R1	R2	R3	R4	T1
1	Benzyl acetate	140-11-4	1104.78±94.67	31078.55±1397.15	60363.02±2467.77	65623.35±1692.94	63401.4±735.3	61816.03±2105.26
2	1-Ethyl-3-methyl-benzene	620-14-4	73.49±2.56	188.06±17.14	231.14±28.11	224.96±13.38	218.58±2.92	222.88±13.99
3	β-Ionone	14901-07-6	71.49±10.35	132.82±5.6	192.51±44.81	173.59±13.79	195.78±14.7	203.09±13.58
4	cis-Ocimene	3338-55-4	34.5±5.47	110.31±16.99	363.51±45	242.41±28.9	221.82±2.42	195.35±22.06
5	Benzaldehyde	100-52-7	59.44±3.04	143.95±12.07	166.33±23.28	164.54±10.76	158.73±4.89	155.73±7.2
6	Benzeneacetaldehyde	122-78-1	43.64±3.68	63.24±7.3	191.88±23.45	147.14±12.16	120.87±1.31	140.79±17.55
7	Octyl butyrate	110-39-4	49.65±8.35	124.4±16.79	147.14±17.9	136.95±9.3	156.35±2.21	139.84±10.43
8	2-Nonenenitrile	29127-83-1	-	49.15±9.76	105.55±23.79	110.7±11.34	113.11±3.58	100.74±5.66
9	2,2-Dimethyl-3-hexanone	5405-79-8	-	41.86±6.04	59.46±9.85	43.64±1.42	60.35±31.83	44.7±1.84
10	2,2,6-Trimethylcyclohexan-1-one	2408-37-9	13.67±0.51	38.33±3.08	40.69±6.05	35.72±1.55	41.95±3.88	40.06±5.98
11	Pinocamphone	547-60-4	15.78±1.98	28.59±1.78	32.6±2.89	36.25±1.87	34.13±4.63	38.84±1.76
12	Allyl benzoate	583-04-0	-	31.83±3.05	71.62±9.52	48.12±5.96	41.29±2.29	38.24±1.15
13	2-Ethyl-1-dodecanol	19780-33-7	7.54±2.51	24.5±3.04	35.62±5.41	31.2±1.37	34.44±3.89	36.33±5.26
14	(E)-2-Nonenal	18829-56-6	-	24.35±0.75	25.3±2.72	29.01±1.93	31.16±3.69	34.97±1.43
15	2,6,10-Trimethyl-dodecane	3891-98-3	12.85±2.31	29.31±3.45	37.08±4.97	32.28±2.02	37.97±0.53	31.53±1.93
16	2-Methyl-tridecane	1560-96-9	12.12±2.13	28.25±3.2	36.2±4.85	31.11±1.87	37.09±0.83	31.47±1.92
17	(+)-cis-Verbenol, acetate	29135-27-1	-	20.71±1.53	27.75±6.41	31.92±2.81	32.42±2.66	31.38±2.64
18	Trans-2-Undecen-1-ol	75039-84-8	12.32±1.98	28.54±3.34	36.79±4.84	31.94±1.73	37.48±0.54	31.02±1.89
19	1-Hexanol	111-27-3	-	22.71±3.21	29.38±5.3	30.21±2.31	26.15±1.67	29.82±2.58
20	3,4-Dimethoxytoluene	494-99-5	13.49±0.39	31.82±3.2	26.54±4.64	31.69±1.03	27.11±2.1	26.97±2.14
21	2-Methyl-2,5-divinyltetrahydrofuran	104188-15-0	-	22.79±2.01	43.03±6.94	24.92±0.8	25.02±2.04	26.27±1.84
22	Geranyl formate	105-86-2	9.52±1.19	15.8±2.34	24.21±3.96	21.24±1.49	25.58±0.39	24.65±2.37
23	2,6-Dimethyl-(Z)-2,7-octadiene-1,6-diol	103619-06-3	8.03±1.4	16.36±2.6	22.79±3.28	21.61±1.77	26.1±0.33	23.59±1.92
24	β-Myrcene	123-35-3	18.04±1.96	23.85±2.36	45.43±10.36	31.89±3.73	29.02±1.86	23.3±2.79
25	2-Cyclohexen-1-one	930-68-7	-	22.08±2.1	41.95±6.38	23.71±0.4	21.96±1.58	23.26±1.73
26	Norbornadieone	10218-02-7	-	21.61±1.94	42.09±6.07	24.19±0.5	23.78±2.26	22.65±0.95
27	2,2,4,6,6-Pentamethylheptane	13475-82-6	15.38±1.89	33.31±4.04	34.07±2.54	33.71±5.39	29.54±1.42	21.66±1.85
28	1,4-Methanoazulen-3-ol, decahydro-1,5,5,8a-tetramethyl-, [1S-(1α,3β,3aβ,4α,8aβ)]- (9CI)	99481-30-8	4.78±1.65	15.68±1.98	21.87±2.5	19.71±0.79	21.27±1	20.65±1.74
29	1-Iodo-nonane	4282-42-2	5±0.61	9.44±1.4	13.81±1.64	12.09±0.59	13.97±0.46	12.79±0.72
30	(S)-2,5-Dimethyl-3-vinylhex-4-en-2-ol	35671-15-9	2.02±0.56	6.94±0.75	23.9±3.08	15.37±2.14	14.48±0.3	12.66±1.49
31	5-(sec-Butyl)-2,3-dimethylpyrazine	32263-00-6	3.53±0.75	8.37±0.99	10.27±2.28	10.28±0.48	9.94±1.5	10.51±0.64
32	2-Methyl-3-propan-2-ylcyclopentan-1-one	54549-81-4	4.11±0.15	9.16±0.85	9.67±0.75	9.65±0.23	9.99±0.68	10.49±1.81
33	1,4-Diethyl-benzene	105-05-5	2.45±0.32	6.41±1.06	18.61±2.23	11.92±1.7	11.47±0.34	10.2±1.53
34	3-Propylpyridine	4673-31-8	5.24±0.71	8.55±0.86	17.7±3.51	15±2.2	12.5±1.27	9.34±1.47
35	5-Decanolide	705-86-2	3.48±0.53	6.39±0.89	8.24±0.87	7.51±0.7	7.95±0.55	9.01±1.27
36	1H-Pyrrole-2-carboxaldehyde	1003-29-8	1.63±0.31	4.88±0.39	9.17±1.43	8.75±0.18	9.84±0.21	8.63±0.44
37	3,4-dimethyl-1,5-Cyclooctadiene	21284-05-9	0.8±0.12	2.6±0.38	11.12±2.32	6.67±0.72	7.68±1.32	8.1±2.86
38	4-Isopropylcyclohexa-1,3-dienecarbaldehyde	1197-15-5	0.13±0.02	3.26±0.62	6.74±1.58	6.46±0.59	6.62±0.57	7±1
39	1,2,3,4,5-Pentamethylcyclopentadiene	4045-44-7	3.98±0.19	6.82±0.99	11.45±2.12	9.79±1.49	8.73±0.32	6.48±0.53
40	Isopentyl acetate	123-92-2	-	7.97±0.82	13.8±0.97	8.17±0.29	6.75±0.41	6.12±0.2
41	1-Naphthalenecarboxaldehyde	66-77-3	1.16±0.18	3.33±0.52	7.27±0.35	6.97±0.47	6.3±0.3	6.02±0.86
42	Cosmene	460-01-5	2.34±0.23	6.36±0.38	6.21±0.69	5.88±1.35	5.11±0.73	5.75±1.68
43	Butyl caprate	30673-36-0	1.17±0.54	3.65±0.64	5.26±0.73	4.98±0.23	5.28±0.61	5.64±1.11
44	3,3-Dimethyl-octane	4110-44-5	2.18±0.15	3.49±0.65	5.14±0.5	4.74±0.7	5.54±0.68	5.01±0.19
45	Amyl acetate	628-63-7	0.35±0.04	4.78±0.52	7.06±0.91	6.15±0.33	5.61±0.44	4.9±0.48
46	Isobutyl butyrate	539-90-2	2.17±0.18	3.76±0.7	5.32±0.29	4.25±0.46	5.11±0.2	4.89±0.8
47	1H-Tetrazole	288-94-8	3.46±0.39	5.24±0.51	8.09±2.82	6.22±0.64	12.12±7.43	4.85±0.14
48	D-Verbenone	18309-32-5	1.62±0.07	4.15±1.26	5.94±0.81	5.89±0.24	4.61±0.47	4.45±0.55
49	Diosphenol	490-03-9	1.58±0.22	2.93±0.31	4.18±0.68	3.83±0.34	4.7±0.31	4.24±0.31
50	4-(Acetyloxy)-(Z)-3-penten-2-one	38365-58-1	-	1.75±0.28	4.92±0.56	4.37±0.27	4.8±0.34	4.16±0.31
51	Disulfur compounds, ethyl 1-methylethyl	53966-36-2	1.81±0.22	3.2±0.47	6.99±1	5.97±1.15	4.68±0.3	3.82±0.43
52	3-N-Propyl-2-pyrazolin-5-one	29211-70-9	0.71±0.18	2.62±0.11	5.62±0.61	5.31±0.82	3.41±0.11	3.47±0.46
53	Undecanal	112-44-7	1.16±0.24	2.03±0.21	3.2±0.42	2.74±0.27	3.19±0.09	3.47±0.5
54	Geranyl isovalerate	109-20-6	0.75±0.13	2.53±0.56	4.68±0.73	4.27±0.2	4.22±0.52	3.38±1
55	4-Methylurazole	16312-79-1	1.24±0.12	1.98±0.33	4.73±0.4	3.49±0.23	3.15±0.04	3.3±0.8
56	Butyl caprylate	589-75-3	0.54±0.11	2.4±0.5	3±0.48	2.76±0.24	2.78±0.59	2.84±0.83
57	2-Methyl-4,5-dihydro-1H-imidazole	534-26-9	0.42±0.03	2.21±0.23	3.14±0.44	3.06±0.16	2.62±0.27	2.53±0.31
58	2-Cyano-2-ethyl-butyramide	18705-38-9	0.39±0.05	1.21±0.15	2.35±0.22	2.25±0.06	2.33±0.31	2.33±0.32
59	3-Formyl-5,5-dimethyl-2-cycolohexen-1-one	56621-35-3	-	1.2±0.37	2.01±0.29	1.71±0.11	2.28±0.09	2.01±0.14
60	Hexalin acetate	622-45-7	0.72±0.13	1.07±0.14	2.67±0.33	1.63±0.26	1.98±0.25	1.84±0.45
61	1-Methoxy-4-phenoxy-benzene	1655-69-2	0.24±0.05	1.06±0.14	2.57±0.28	2.64±0.35	2.12±0.29	1.79±0.18
62	2,2,4-Trimethyl-1,3-pentanediol diisobutyrate	6846-50-0	-	0.63±0.09	1.82±0.26	1.6±0.03	1.69±0.29	1.37±0.23
63	Diphenylmethane	101-81-5	-	0.69±0.17	0.99±0.15	0.97±0.02	1.11±0.07	1.2±0.17
64	1-Methyl-cyclohexanol	590-67-0	0.29±0.13	0.84±0.12	1.35±0.05	1.14±0.13	1.13±0.17	0.94±0.08
65	3,3,5-Trimethyl-heptane	7154-80-5	0.31±0.09	0.75±0.13	1.29±0.07	1.1±0.21	1.07±0.16	0.92±0.09
66	1-Hepten-3-one	2918-13-0	-	1.02±0.25	0.94±0.17	0.95±0.07	0.74±0.18	0.67±0.17
67	1-Ethenyl-cyclohexanol	1940-19-8	1.23±0.19	1.83±0.38	4.75±4.35	2.28±0.17	8.97±10.53	-
68	Methyl dihydrojasmonate	24851-98-7	-	0.86±0.23	2.41±1.06	3.95±1.7	-	-

## Sheet: Table S5
Table S5. The content of differential VOCs in subclass 4
No.	Volatile compounds	CAS	Content (ug/kg)
			BT	R1	R2	R3	R4	T1
1	3-Hexen-1-ol benzoate	25152-85-6	-	364.39±40.27	14269.58±2226.98	25290.38±1048.21	29882.39±1181.44	30373.05±1074.62
2	Benzyl alcohol	100-51-6	22.18±11.9	2170.88±167.64	8216.11±881.67	15827.15±701.54	18651.77±1245.73	20263.03±556.46
3	2-Isopropyl-5-methyl-9-methylene-bicyclo[4.4.0]dec-1-ene	150320-52-8	6.12±2.92	261.6±32.37	2961.94±477.65	4580.2±336.36	4957.1±241.83	6148.9±320.15
4	(+)-D-Cadinene	483-76-1	18.78±4.02	368.51±44.07	1907.27±225.41	3473.53±126.71	3978.27±33.05	4421.29±289.33
5	(2S,4Ar,8Ar)-4A,8-Dimethyl-2-(prop-1-en-2-yl)-1,2,3,4,4A,5,6,8A-octahydronaphthalene	123123-37-5	11.32±2.32	244.01±28.46	1401.23±172.77	2718.73±137.98	3365.07±127.1	3914.81±238.06
6	Cubebol	23445-02-5	11.46±2.71	243.13±28.26	1395.95±171.89	2708.67±138.36	3348.65±125.22	3892.83±237.15
7	Cadina-3,9-diene	523-47-7	10.89±2.35	243.07±28.22	1395.57±171.84	2708.14±138.35	3348±125.19	3892.31±236.7
8	(1α,4Aβ,8Aα)-1,2,3,4,4A,5,6,8A-Octahydro-7-methyl-4-methylene-1-(1-methylethyl)-naphthalene	39029-41-9	10.93±2.2	243.13±28.26	1395.57±170.94	2706.8±138.34	3346.17±125.07	3890.75±235.34
9	2-Methyl-4,6-octadiyn-3-one	29743-33-7	10.41±2.52	360.56±32.05	1401.83±140.88	2803.68±136.07	3269.8±200.69	3509.16±88.28
10	Benzyl isobutyrate	103-28-6	-	91.02±8.8	1276.53±120.45	2266.3±137.01	2555.09±74.81	2546.98±117.24
11	2-Undecanone	112-12-9	1.06±1.03	79.26±8.51	1161.45±130.78	2064.78±120.22	2383.42±94.26	2354.14±107.52
12	Aristolochene	26620-71-3	40.71±11.37	48.93±5.4	321.68±91.99	783.53±20.46	1006.26±62.14	1617.06±124.17
13	1,4-Dimethyl-7-(prop-1-En-2-Yl)-1,2,3,3A,4,5,6,7-octahydroazulene	22567-17-5	2.38±0.6	52.2±7.32	467.39±101.15	1045.34±86.86	1351.64±59.74	1554.69±142.64
14	Benzoic ether	93-89-0	3.76±0.51	86.51±10.29	608.53±75.6	862.09±20.02	1123.54±31.46	1275.83±75.35
15	Benzoic acid	65-85-0	6.79±0.72	93.49±4.95	608.57±63.82	858.27±35.22	1123.81±15.04	1274.24±67.19
16	1-(2,3,4,5-Tetramethylphenyl)ethanone	34764-71-1	2.62±0.81	62.28±8.7	457.03±69.08	921.14±55.47	1094.62±16.76	1213.33±95.26
17	Ethyl pelargonate	123-29-5	-	32.12±2.69	566.62±56.98	1043.39±61.58	1187.55±42.28	1190.38±54.45
18	Eugenol	97-53-0	-	29.28±2.04	330.96±167.18	725.51±86.8	925.72±168.45	1113.2±110.54
19	Curcumene	644-30-4	41.04±11.6	40.25±7.1	218.9±65.3	514±13.55	657.61±41.38	1057.57±78.93
20	Palustrol	5986-49-2	-	-	453.79±78.01	807.44±30.4	1002.64±45.24	1049.93±53.6
21	(5-Bromopentyl)-benzene	14469-83-1	55.82±16.08	57.76±9.63	250.65±70.24	520.18±10.21	664.05±37.33	1049.75±77.18
22	1,2,3,4,4a,5,8,9,12,12a-Decahydro-1,4-methanobenzocyclodecene	74708-73-9	-	-	397.2±75.76	742.67±36.92	945.13±54.09	999.64±49.81
23	Benzyl benzoate	120-51-4	-	-	111.02±101.33	352.54±35.66	664.35±348.74	745.68±540.9
24	Citronellyl isobutyrate	97-89-2	20.35±5.54	22.1±2.97	137.19±39.6	334.13±8.23	431.32±24.82	696.44±52.26
25	Bibenzyl	103-29-7	3.1±0.55	59.49±7.11	298.41±35.16	534.14±24.46	612.03±3.97	675.3±43.03
26	Epizonarene	41702-63-0	1.93±0.45	50.45±6.42	314.63±28	550.67±29.18	612.92±23.6	669.14±45.24
27	8,8-Dimethyl-9-methylidenecycloundeca-1,5-diene	62338-54-9	55.99±14.79	54.81±10.62	192.56±52.6	333.01±7.35	418.3±22.09	637.91±46.35
28	Methyl enanthate	106-73-0	-	75.31±2.59	254.43±21.59	485.92±23.92	569.67±26.73	613.96±14.95
29	[1S-(1α,4α,7α)]-1,2,3,4,5,6,7,8-Octahydro-1,4,9,9-tetramethyl-4,7-methanoazulene	514-51-2	3.66±0.53	48.36±6.52	236.29±26.83	414.49±33.82	545.85±2.02	600.59±45.24
30	Copaene	3856-25-5	3.62±0.49	48.09±6.49	235.82±26.55	413.29±33.32	541±8.72	585.91±43.24
31	(Z)-1-Methyl-4-(6-methylhept-5-en-2-ylidene)cyclohex-1-ene	13062-00-5	2.27±0.14	38.02±4.88	197.51±24.8	379.18±21.73	471.54±11.54	559.01±32.62
32	4-(1,5-Dimethyl-1,4-hexadienyl)-1-methyl-cyclohexene	17627-44-0	2.05±0.44	38.44±6.14	198.59±24.99	381.53±21.69	474.52±12.01	557.8±33.89
33	Citronellyl butyrate	141-16-2	2.52±0.45	46.04±5.66	239.12±29.05	430.97±19	494.96±2.4	550.31±37.33
34	(4R,4As,6S)-4,4A-Dimethyl-6-(prop-1-en-2-yl)-1,2,3,4,4A,5,6,7-octahydronaphthalene	823810-22-6	0.84±0.12	20.82±2.61	212.28±41.41	411.14±21.44	478.13±8.96	535.54±37.29
35	Carbonochloridodithioic acid, methyl Ester	16696-91-6	1±0.27	61.14±2.33	207.32±17.08	391.85±16.06	459.98±24.75	488.8±10.55
36	Di-Epi-α-Cedrene-(I)	21996-77-0	2.61±0.33	36.85±4.87	194.43±22.97	326.89±24.05	425.66±2.06	461.1±33.62
37	β-Cubebene	13744-15-5	1.65±0.19	19.85±2.82	149.43±22.94	312.48±26.2	366.37±5.85	411.11±42.45
38	A-Muuroladiene	31983-22-9	0.41±0.13	14.63±0.48	132.38±23.11	282.89±10.84	357.19±14.25	401.02±26.47
39	Butyl benzoate	136-60-7	2.8±0.83	34.93±3.83	171.58±22.07	285.16±23.53	366.28±3.63	396.89±28.92
40	Benzyl tiglate	37526-88-8	-	6.72±1.03	144.33±46.9	270.69±12.14	342.37±26.69	378.04±28.71
41	β-Gurjunene	17334-55-3	2.47±0.51	22.76±2.78	132.81±19.06	274.17±23.09	333.45±6.32	376.12±33.43
42	Ethyl salicylate	118-61-6	-	34.27±5.92	116.57±36.41	276.06±16.03	312.84±38	357±48.97
43	3,7(11)-Selinadiene	6813-21-4	1.21±0.26	20.14±2.24	122.12±14.11	228.88±8.52	265.69±2.99	306.89±16.56
44	Dendrolasin	23262-34-2	1.52±0.72	14.26±1.45	114.26±20.89	242.01±9.36	269.38±12.02	306.01±20.09
45	Neryl 2-methylbutyrate	51117-19-2	1.55±0.78	14.91±1.34	113.74±20.36	239.78±9.7	265.5±12.03	302.25±20.01
46	Benzene, [1-[[1-(1-methylethyl)-3-butenyl]oxy]ethyl]-, [S-(R*,R*)]- (9CI)	98088-51-8	0.9±0.17	11.18±1.15	92.24±18.82	199.69±14.49	259.93±10.86	299.65±26.76
47	(-)-Germacrene-D	317819-80-0	0.61±0.12	13.24±1.98	104.72±21.77	199.99±17.85	252.6±11.98	294.52±34.38
48	P-Mentha-8-thiol-3-one	38462-22-5	0.26±0.04	11.26±1.84	139.91±58.05	193.17±7.5	224.68±41.38	271.96±36.55
49	Geraniol	106-24-1	2.84±0.49	27.82±3.15	110.37±31.3	160.55±10.4	191.66±26.81	251.61±39.78
50	3,4-Methylenedioxybenzyl acetate	326-61-4	0.89±0.03	15.79±2.03	87.58±10.19	169.97±9.1	206.45±7.2	243.11±17.55
51	1,1'-(1,4-Phenylene)bis-ethanone	1009-61-6	1.07±0.21	6.68±0.56	65.43±10.89	157.06±10.36	182.11±1.06	241.8±17.76
52	1,3,5-Trimethyl-1h-pyrazole	1072-91-9	14.08±2.11	76.63±2.62	116.47±16.03	177.02±7.52	206.63±23.57	234.4±9.83
53	N-Benzyloxy-2-carbomethoxyaziridine	53084-33-6	-	-	53.51±25.66	122.34±8.26	187.15±27.63	230.89±34.32
54	1,5-Dimethyl-1-vinyl-4-hexenyl butyrate	78-36-4	5.02±1.02	16.97±2.04	73.49±13.18	145.63±10.81	168.36±3.77	229.36±18.67
55	T-Muurolol	19912-62-0	1.01±1.05	3.98±0.21	46.59±28.17	99.54±7.33	161.52±35.03	223.62±33.93
56	7-Octylidenebicyclo[4.1.0]heptane	82253-11-0	1±0.09	17.78±2.04	95.11±11.1	173.2±6.49	196.83±1.09	220.23±14.55
57	α-Cadinol	481-34-5	0.75±0.6	3.95±0.7	44.83±22.37	102.81±7.7	164.79±35.54	215.26±34.34
58	Acoradiene	24048-44-0	0.63±0.26	7.88±1.06	65.68±16.09	144.46±12.25	183.45±8.85	212.35±16.13
59	Hinokitiol	499-44-5	0.87±0.17	11.27±1.28	66.43±9.79	131.4±7.11	165.5±8.55	203.29±17.13
60	cis-3-Hexenyl salicylate	65405-77-8	0.32±0.12	3.61±0.11	38.55±18.84	96.13±6.72	145.81±32.08	203.14±29.27
61	β-Cedrene	546-28-1	3.49±0.53	14.4±1.83	66.39±8.68	135.97±11.2	156.99±0.97	201.2±17.44
62	β-Selinene	17066-67-0	18.25±4.68	20.23±2.4	58.7±15.99	101.69±2.23	128.19±7.31	192.9±14.78
63	(6,6-Dimethyl-2-bicyclo[3.1.1]hept-2-enyl)methyl 2-methylpropanoate	29021-37-2	0.56±0.14	6.5±0.74	56.46±11.42	121.24±8.25	154.5±9.07	181.99±18.43
64	Cubenene	29837-12-5	0.92±0.22	13.59±1.66	78.58±9.22	146.66±8.94	169.93±1.06	179.66±12.64
65	Undecylenic acid	112-38-9	13.85±3.22	15.77±1.48	45.57±11.98	87.47±1.44	112.1±5.96	172.7±13.37
66	1-Phenylhexan-3-one	29898-25-7	3.9±0.6	12.94±1.77	56.42±9.24	111.48±10.84	129.6±3.2	170.89±17.02
67	2-Hydroxy-1-phenylbutan-1-one	16183-46-3	0.38±0.05	5.93±0.25	49.93±8.23	108.3±7.95	126.8±3.39	150.98±13.59
68	Isobutyl phenylacetate	102-13-6	-	7.44±1.32	55.33±11.2	105.93±6.96	129.29±5.2	148.41±12.68
69	Benzyl 2-methylbutyrate	56423-40-6	0.17±0.04	7.43±0.32	54.75±10.27	102.35±9.5	127.05±5.08	147.43±13.92
70	β-Acorenol	28400-11-5	0.79±0.28	6.11±0.24	48.81±14.93	104.94±6.21	135.7±9.15	146.57±4.1
71	3,4-Dimethylbenzoic acid methyl ester	38404-42-1	-	3.81±0.42	41.12±20.93	89.64±10.22	116.18±22.56	141.32±14.91
72	Tetrasulfur compounds, di-2-Propenyl	2444-49-7	1.11±0.29	13.48±1.64	61.43±7.46	108.32±4.79	123.29±0.3	134.96±7.83
73	Acetoxyacetic acid	13831-30-6	-	16±0.52	54.84±5.58	104.22±5.59	123.66±6.48	132.53±4.49
74	(+)-α-Cadinene	24406-05-1	0.71±0.08	8.86±1.35	54.02±5.24	100.37±8.14	119.98±1.64	130.68±9.04
75	(+)-Shyobunone	21698-44-2	0.25±0.03	4.87±0.63	68.15±8.58	103.24±2.75	117.17±2.12	130.49±7.04
76	Dehydrodihydroionone	20483-36-7	2.18±0.37	9.55±1.6	43.02±6.14	84.07±6.29	95.97±1.31	126.16±10.19
77	Selina-4(15),7(11)-diene	515-17-3	0.32±0.12	6.04±0.96	45.94±6.96	94.62±5.31	112.13±2.18	123.27±10.91
78	Nerolidol	40716-66-3	1.04±0.28	1.5±0.4	24.33±11.62	47.73±2.72	83.18±13.21	117.92±18.3
79	Ethyl mandelate	774-40-3	2.29±0.31	8.09±1.1	34.9±5.26	71.82±5.35	83.35±1.86	112.67±9.66
80	Sesquiphellandrene	20307-83-9	0.96±0.3	10.67±1.26	46.98±5.31	88.71±5.61	101.28±3.74	111.8±4.79
81	Geranyl butyrate	106-29-6	-	-	21.66±10.26	42.05±3.29	75.36±13.45	110.92±17.91
82	(+)-Isoitalicene	94482-89-0	-	5.14±0.26	36.54±5.38	74.93±4.24	95.43±2.93	110.89±14.19
83	(+)-Sativene	3650-28-0	0.29±0.03	6.36±0.72	40.83±8.01	70.94±7.45	88.94±4.11	110.09±14.4
84	(1S,5S)-2-Methyl-5-((R)-6-methylhept-5-en-2-yl)bicyclo[3.1.0]hex-2-ene	159407-35-9	-	3.02±0.22	33.04±6.96	78.79±6.84	83.49±3.54	105.89±12.98
85	(-)-Aristolene	6831-16-9	0.37±0.06	4.93±0.85	38.91±7.77	74.78±5.94	92.78±3.52	105.86±9.92
86	Lavandulyl caproate	59550-36-6	-	4.02±0.17	32.43±13.26	64.27±3.68	90.05±7.14	102.68±9.11
87	Benzyl isothiocyanate	622-78-6	-	-	32.42±12.76	63.67±8.96	82.44±15.72	102.55±14.63
88	(2R,8R,8As)-8,8A-Dimethyl-2-(prop-1-en-2-yl)-1,2,3,7,8,8A-hexahydronaphthalene	5090-61-9	0.23±0.01	5.76±0.83	48.34±9.63	84.79±6.95	99.53±2.15	102.23±8.9
89	Geranylacetone	3796-70-1	0.63±0.23	3.36±0.7	28.1±6.52	65.8±6.32	79.09±4.19	100.46±10.76
90	Sabinyl acetate	3536-54-7	-	3±0.29	47.36±9.53	82.91±4.7	99.48±2.06	96.73±1.69
91	Ethyl 4-ethoxybenzoate	23676-09-7	0.46±0.07	8.19±0.78	43.04±5.49	76.28±3.61	87.03±0.48	93.85±6.61
92	Valerena-4,7(11)-diene	351222-66-7	0.58±0.05	2.89±0.23	25.17±4.6	59.73±3.82	68.1±0.99	91.08±6.45
93	2-Dimethyl-2H-1-benzopyran, 6,7-dimethoxy-2	644-06-4	0.34±0.06	2.65±0.26	20.22±5.2	47.31±2.61	65.25±14.22	85.96±9.56
94	α-Ionone	127-41-3	1.84±0.42	6.41±0.77	26.89±4.05	53.86±4.61	61.95±1.92	85.59±6.39
95	Geranylacetone	689-67-8	0.6±0.39	2.52±0.78	32.7±7.65	54.82±5.21	65.58±3.45	85.02±9.41
96	6,10-Dimethyl-5,9-undecadien-2-ol	53837-34-6	0.68±0.29	2.92±0.21	23.29±4.28	55.04±3.67	64.51±0.27	84.99±6.87
97	α-Irone	79-69-6	0.49±0.02	9.51±0.84	40.28±5.06	67.35±3.05	76.71±0.53	84.81±5.43
98	N,N-Dimethylhexanamide	5830-30-8	-	9.19±1.03	34.45±3.46	66.72±3.12	77.35±4.15	84.14±1.92
99	2-Methyl-6-propyldodecane	55045-08-4	22.29±3.81	33.45±2.7	55.47±8.69	61.33±1.93	72.62±3.09	82.72±5.73
100	Amorphadiene	92692-39-2	0.51±0.15	2.31±0.24	22.82±3.9	51.21±3.25	60.21±1.01	78.47±5.96
101	Dihydrocurcumene	1461-02-5	-	3.27±0.66	26.59±4.45	50.68±5.32	61.72±3.6	74.67±8.17
102	Citronellyl tiglate	24717-85-9	-	2.4±0.61	20.45±5.57	45.79±2.69	60.76±6.73	72.58±6.98
103	1-(4-Methoxyphenyl)-4-methylpent-1-en-3-one	103-13-9	-	0.47±0.04	11.93±6.54	23.43±1.67	44.09±9.76	71.96±11.34
104	Neointermedeol	5945-72-2	-	1.73±0.21	18.25±6.26	43.46±4.57	56.21±6.89	69.2±6.95
105	(1R,2R)-1-(4-Methylphenyl)-2-methyl-3-buten-1-ol	83173-76-6	0.17±0.08	1.67±0.18	17.26±2.77	41.18±1.77	48.48±2.48	68.95±6.12
106	3-(Pyrrolidin-2-yl)pyridine	5746-86-1	0.35±0.09	4.27±0.97	25.74±3.85	47.11±3.78	57.4±1.55	63.24±6.35
107	Trans-α-Bergamotene	13474-59-4	0.43±0.12	4.12±0.81	24.93±3.33	46.36±4.23	56.67±1.19	61.35±5.55
108	Piperonal	120-57-0	-	2.25±0.32	28.36±4.7	47.92±11.12	56.83±4.73	61.35±3.95
109	Ibuprofen	15687-27-1	-	2.04±0.05	17.95±3.6	37.7±1.93	50.41±4.5	58.79±5.89
110	β-Phenylethylmethylethylcarbinol	10415-87-9	0.34±0.02	4.75±0.24	30.74±5.28	49.82±3.3	53.99±2.64	58.73±4.94
111	N-Heptyl hexanoate	6976-72-3	0.18±0.05	2.94±0.31	22.65±3.22	44.46±2.54	52.37±1.3	56.81±4.67
112	(3S,3Ar,6R,8As)-3,7,7-Trimethyl-8-methylenehexahydro-1H-3A,6-methanoazulen-2(3H)-one	28624-27-3	-	1.27±0.14	13.9±4.05	30.72±2.94	43.14±7.01	56.7±8.57
113	Cubenol	21284-22-0	-	1.94±0.27	15.38±4.58	33.43±2.08	44.34±4.27	54.99±7.44
114	Aplotaxene	10482-53-8	-	1.28±0.28	13.56±4.56	31.68±2.24	45.05±4.36	54.71±5.79
115	Trans-Nerolidol	7212-44-4	-	-	13.38±4.07	25.81±2.36	40.72±5.46	51.37±7.54
116	Cedrene	11028-42-5	1.22±0.11	3.91±0.45	15.93±2.16	32.97±2.73	37.62±0.55	50.99±3.99
117	P-Tolylacetic acid	622-47-9	0.94±0.14	1.73±0.03	15.31±8.21	32.5±3.88	42.34±6.38	49.68±5.52
118	4-Hydroxy-benzenemethanol	623-05-2	1.09±0.19	3.84±0.36	15.29±2.55	30.75±2.33	35.8±1.19	48.49±3.53
119	(1S,4S,4As)-1-Isopropyl-4,7-dimethyl-1,2,3,4,4A,5-hexahydronaphthalene	267665-20-3	0.27±0.02	1.44±0.1	13.29±2.31	31.73±1.87	36.3±0.97	47.59±3.49
120	(1S,4S,4As,8Ar)-1-Isopropyl-4,7-dimethyl-1,2,3,4,4A,5,6,8A-octahydronaphthalen-4A-ol	73365-77-2	-	1.77±0.32	18.09±3.77	31.71±2.41	46.26±3.21	47.13±7
121	(E)-Oct-3-en-2-one	18402-82-9	2.87±1	7.73±0.85	25.33±29.58	13.06±1.36	42.76±13.02	47.1±19.48
122	4-(3-Hydroxy-1-propenyl)-2-methoxy-phenol	458-35-5	-	0.92±0.17	7.89±4.83	20.29±2.25	32.08±7.18	46.25±7.73
123	ε-Muurolene	30021-46-6	0.4±0.11	1.6±0.15	13.1±2.11	29.66±2.01	34.4±0.36	45.74±3.09
124	(E)-β-Famesene	18794-84-8	1.01±0.15	2.23±0.4	12.29±1.39	28.06±3.56	31.92±0.87	44.44±2.91
125	1-Phenylcyclohexylamine	2201-24-3	0.26±0.09	2.89±0.1	16.05±1.52	31.5±2.25	38.4±1.55	44.04±3.51
126	2,2'-Isopropylidenebis(5-methylfuran)	59212-75-8	0.3±0.11	1.24±0.15	11.71±1.79	27.64±1.74	32.09±0.83	42.97±3.53
127	N,N'-Methylenebismethacrylamide	2359-15-1	-	1.9±0.2	12.24±7.79	22.3±1.9	35.24±5.23	42.68±4.69
128	Neryl isobutyrate	2345-24-6	-	2.22±0.09	15.12±2.48	30.46±2.2	37.2±1.27	41.31±3.47
129	Perillic acid	7694-45-3	2.77±0.6	3.39±0.41	14.33±4.32	22.37±1.71	29.68±2.71	41.19±3.32
130	(E)-4-(3-Hydroxybut-1-en-1-yl)-3,5,5-trimethylcyclohex-2-enone	34318-21-3	-	1.24±0.08	11.49±8.75	19.38±0.98	31.81±5.41	40.65±4.17
131	α-Damascone	24720-09-0	6.8±1.02	16.19±2.05	23.41±3.06	30.39±1.49	35.82±0.84	39±3.76
132	Sandacanol	28219-61-6	-	-	7.71±3.5	15.01±1.12	25.46±4.99	38.16±6.64
133	2-Acetyl pyrrole	1072-83-9	4.05±0.75	4.42±0.29	15.06±11.33	16.42±2.79	24.42±9.63	38.06±11.38
134	Hexyl caproate	6378-65-0	0.32±0.04	4.5±1.02	19.93±1.46	28.37±1.65	35.35±2.89	36.21±1.09
135	3-Methoxycinnamaldehyde	56578-36-0	0.16±0.05	1.49±0.25	12.81±2.55	23.94±2.12	29.7±1.47	36.06±4.58
136	Isopentyl hexanoate	2198-61-0	8.72±0.61	13.28±1.51	23.89±3.94	27.59±0.98	33.2±1.25	35.92±4.27
137	α-Bergamotene	17699-05-7	0.24±0.05	2.77±0.38	13.09±2	26.37±2	31.57±0.26	35.6±3.24
138	Ethylcinnamate	4192-77-2	-	1.76±0.17	11.95±2.62	23.79±1.54	29.91±1.41	34.49±2.69
139	1-Dodecanol	112-53-8	-	2.25±0.2	13.99±1.7	27.14±1.65	29.55±2.71	33.03±5.87
140	2-Pyridin-2-ylmethyl-cyclohexanone	113777-22-3	-	-	18.49±3.64	22.23±1.51	28.12±1.92	32.7±4.83
141	Pentylenetetrazol	54-95-5	-	-	7.37±2.5	14.02±0.8	23.73±2.93	32.43±4.81
142	Acetic acid, (4,6,8,9-tetramethyl-3-oxabicyclo[3.3.1]mon-6-en-1-yl)methyl ester	309722-81-4	-	1.4±0.04	12.51±3.07	27.93±1.91	33.21±0.62	32.24±0.42
143	Ethylcinnamate	103-36-6	0.12±0.07	1.2±0.16	10.23±2.5	20.94±1.24	26.62±3	30.75±2.32
144	(E,E)-2,4-Undecadienal	30361-29-6	0.33±0.06	2.23±0.28	10.9±1.38	22.5±1.94	26.99±0.2	30.68±2
145	4-Heptyl-phenol	1987-50-4	-	1.03±0.13	7.86±3.3	19.21±3.53	24.66±2.58	28.16±1.91
146	(E)-2-Dodecenal	20407-84-5	0.46±0.16	1.27±0.2	9.09±2.34	18.47±1.31	24.01±0.64	27.58±2.86
147	(-)-α-Gurjunene	489-40-7	0.51±0.09	2.27±0.32	9.73±0.57	19.16±1.82	22.97±1.19	27.59±2.86
148	Geranyl valerate	10402-47-8	-	0.82±0.15	7.45±2.63	15.4±0.69	21.31±2.43	26.88±3.41
149	Benzyl ether	103-50-4	0.28±0.12	1.41±0.3	9.72±3.71	18.59±0.82	26.29±1.87	26.83±0.87
150	5,8-Diethyl-dodecane	24251-86-3	0.33±0.06	0.74±0.21	13.15±2.59	20.7±0.89	26.14±1.14	26.68±1.54
151	Bulnesol	22451-73-6	-	0.69±0.1	7.36±2.49	15.86±0.51	22.49±2.4	26.45±2.08
152	Iridomyrmecin	485-43-8	0.27±0	1.22±0.06	7.87±1.38	17.69±1.17	22.77±1.6	26.37±2.09
153	Eudesma-2,4,11-triene	82462-31-5	-	1.14±0.36	9.24±1.23	20.32±1.56	21.67±1.81	25.59±1.11
154	Niacinamide	98-92-0	0.56±0.06	2.08±0.21	8.19±1.51	16.18±1.14	19.54±0.3	25.42±2.06
155	4-Butyl-phenol	1638-22-8	-	1.64±0.1	9.07±4.41	19.11±2.49	22.67±2.72	24.96±2.74
156	Cinnamyl isobutyrate	103-59-3	-	-	12.36±3.42	18.65±0.64	22.25±1.61	24.9±3.28
157	Pentyl octanoate	638-25-5	6.79±1.16	9.97±0.42	16.07±2.73	17.63±0.41	20.99±0.66	24.79±1.86
158	(Z)-8-Dodecen-1-ol	40642-40-8	0.36±0.09	1.36±0.11	7.51±1.7	15.62±1.37	19.89±1.28	23.26±2.35
159	3-Phenyl-2-propenoic acid	621-82-9	0.31±0.08	1.57±0.2	8.75±1.39	16.9±1.32	20.84±0.29	23.01±2.03
160	Dodecanoic acid	143-07-7	-	-	9.28±1.99	16.87±1.63	20.88±1.66	22.67±0.41
161	2,4,4-Trimethyl-3-(3-methylbutyl)cyclohex-2-enone	88725-82-0	-	0.93±0.11	5.17±1.13	10.16±0.59	13.85±1.83	22.4±3.06
162	Methyl cinnamate	1754-62-7	0.23±0.05	2.45±0.39	9.48±0.79	15.8±1.25	20.19±0.26	22.11±1.11
163	Megastigmatrienone	38818-55-2	-	1.13±0.13	7.85±1.08	16.57±1	19.15±0.33	21.56±1.86
164	4-Aminobenzoic acid	150-13-0	-	-	6.49±2.98	12.16±1.12	18.47±1.39	20.96±2.27
165	2,3-Dimethylquinoxaline	2379-55-7	0.39±0.08	1.4±0.48	7.77±0.58	15.93±1.3	16.75±2.95	20.68±0.6
166	Benzyl valerate	10361-39-4	0.1±0.04	0.87±0.1	7.35±2.63	14.08±1.55	18.49±1.37	20.48±2.19
167	11,11-Dimethyl-4,8-dimethylenebicyclo[7.2.0]undecan-3-ol	79580-01-1	-	-	6.98±6.46	8.63±1.08	16.73±2.43	19.28±2.01
168	(1R,4S,9As)-1-Methyl-4-((Z)-pent-2-en-4-yn-1-yl)octahydro-1H-quinolizine	151805-13-9	-	-	3.53±1.59	8.38±0.62	12.8±2.83	18.59±2.78
169	4-Tert-amylphenol	80-46-6	-	0.48±0.09	5.15±2.3	9.25±1.06	13.64±2.73	17.68±2.74
170	Tetradecyl-oxirane	7320-37-8	-	0.51±0.04	4.36±1.81	11.65±0.82	15.41±2.13	17.51±1.61
171	Prezizaene	31145-21-8	-	0.43±0.09	5.27±2.25	10.44±0.67	14.02±2.02	17.44±4.49
172	Thymol acetate	528-79-0	-	-	4.83±2.84	11.02±1.8	13.46±2.51	17.3±1.33
173	cis-9-Tetradecen-1-ol	35153-15-2	-	0.42±0.11	3.6±1.35	9.44±0.65	13.46±1.89	16.5±1.73
174	Octyl formate	112-32-3	3.24±0.48	4.77±0.43	7.44±2.6	8.82±0.48	12.36±4.05	15.41±7.22
175	6-Pentyl-2H-pyran-2-one	27593-23-3	-	0.42±0.1	6.45±3.67	8.32±0.4	12.1±1.55	15.01±2.29
176	Methylparaben	99-76-3	0.34±0.03	1.17±0.14	5.29±0.93	10.36±0.88	12.64±0.52	15.01±1.19
177	2-Azabicyclo[3.2.1]octan-3-one	26396-67-8	3.41±1.36	4.03±0.44	8.69±2.12	8.73±0.72	10.93±4.85	14.93±4.04
178	4'-Hydroxyacetophenone	99-93-4	-	0.39±0.08	5.79±1.9	9.72±0.63	12.18±0.34	14.74±1.63
179	Dauca-4(11),8-diene	395070-76-5	-	1.39±0.1	6.09±1.25	11.08±0.6	12.74±0.38	14±1.08
180	4'-Methylvalerophenone	1671-77-8	-	0.91±0.28	4.71±1.13	9.35±0.6	12.36±0.37	13.91±1.42
181	2,4-Dihydroxy-3,6-dimethylbenzaldehyde	34883-14-2	-	0.37±0.08	2.66±1.49	5.78±0.62	9.34±2.06	13.21±2.23
182	2-Naphthalenol	135-19-3	0.13±0.03	1.24±0.13	5.1±0.72	9.05±0.48	10.81±0.77	13.01±0.4
183	1-(3-Methylbutyl)-2,3,5,6-tetramethylbenzene	116761-73-0	-	-	3.38±1.13	5.8±0.6	8.23±0.71	12.7±1.35
184	Myrac aldehyde	37677-14-8	-	0.89±0.03	5.47±0.54	9.61±0.43	11.4±0.48	12.5±0.75
185	8,9-Dehydro-neoisolongifolene	67517-14-0	-	0.21±0.03	4.78±1.45	7.42±0.19	10.36±1.44	12.07±1.81
186	4-(2,6,6-Trimethyl-1-cyclohexen-1-yl)-2-butanone	17283-81-7	0.2±0.05	1.21±0.1	4.53±0.55	8.55±0.58	10.16±0.15	11.73±0.88
187	β-Bisabolol	15352-77-9	-	-	3.01±0.91	8.49±0.55	9.33±1.79	11.71±1.05
188	2,5-Dimethyl-benzenamine	95-78-3	-	-	5.44±0.9	7.77±0.76	10.09±0.19	11.12±0.61
189	D-Nerolidol	142-50-7	-	0.86±0.12	4.73±0.59	8.72±0.35	10.12±0.32	10.83±0.76
190	Patulin	149-29-1	-	0.99±0.07	4.84±0.6	8.19±0.76	9.86±0.36	10.6±0.85
191	Allyl 3-cyclohexylpropanoate	2705-87-5	0.22±0.03	0.76±0.18	4.01±0.74	7.6±0.72	9.45±0.51	10.5±1.18
192	5,6-Dihydro-5-methyluracil	696-04-8	-	1.69±0.32	5.1±0.56	8.65±0.61	10±0.38	10.2±0.91
193	3-Butylisobenzofuran-1(3H)-one	6066-49-5	-	-	3.25±1.1	6.38±0.66	9.47±0.46	9.48±0.46
194	1-(4-Acetylphenyl)piperazine	51639-48-6	-	0.31±0.11	2.86±0.31	5.91±0.19	8.13±1.06	9.47±1.05
195	Dimethyl phthalate	131-11-3	-	0.11±0.04	3.64±2.06	5.47±0.42	9.3±1.24	9.1±1.09
196	Citronellyl valerate	7540-53-6	-	-	4.21±1.64	7.04±0.36	9.3±0.48	8.94±1.1
197	4-Hydroxycoumarin	1076-38-6	-	-	2.56±0.87	5.13±0.46	7.13±0.98	8.94±1.21
198	Chrysanthenone	473-06-3	0.95±0.18	4.61±0.91	4.65±0.53	7.77±1.27	10.18±1.66	8.87±1.11
199	α-Dehydro-ar-himachalene	78204-62-3	0.26±0.06	1.65±0.24	4.75±0.38	7.26±0.44	8.55±0.56	8.87±0.5
200	5-Methyl-(E)-2-hepten-4-one	102322-83-8	3.02±0.23	4.66±0.78	6.11±0.35	6.84±0.78	8.11±0.26	8.78±0.74
201	Amyl butyrate	540-18-1	-	1.5±0.19	4.53±0.82	7.2±0.69	8.15±0.38	8.69±0.56
202	Cyclopentyl butyrate	6290-13-7	2.1±0.49	3.62±0.24	4.78±0.85	9.09±1.05	10.47±0.77	8.46±0.66
203	(S)-4-(1-Acetoxyallyl)phenyl acetate	52946-22-2	-	-	3.2±1.26	5.65±0.41	8±0.38	8.37±0.98
204	Trans-Cinnamic acid	140-10-3	-	0.25±0.06	3.19±0.86	5.27±0.46	6.78±0.39	8.21±1
205	2-Acetylbenzofuran	1646-26-0	0.37±0.06	0.74±0.14	2.79±0.38	5.95±0.46	6.89±0.18	8.16±0.38
206	(3R,3Ar,7S,8As)-3,6,8,8-Tetramethyl-4,7,8,8A-tetrahydro-1H-3A,7-methanoazulen-2(3H)-one	288249-25-2	-	0.54±0.02	2.45±0.49	4.67±0.21	6.54±0.84	8.04±1.3
207	E-Farnesene epoxide	83637-40-5	-	-	3.78±0.53	4.69±0.71	6.48±1.54	7.51±1.82
208	(3E,7E)-1,5,5,8-Tetramethylcycloundeca-3,7-dienol	28446-26-6	-	-	3.23±0.42	5.3±0.98	5.96±1.06	7.47±1.46
209	2-Phenylethyl hexanoate	6290-37-5	-	0.45±0.05	2.7±1.03	5.47±0.13	7.26±0.7	7.32±0.38
210	8,9-Epoxyacorenon-B	61050-91-7	-	-	1.87±0.54	3.14±0.42	5.1±0.97	7.18±0.72
211	(2-Nitroethyl)-benzene	6125-24-2	-	-	2.24±0.73	3.6±0.69	5.22±0.69	6.64±0.65
212	7(1H)-Pteridinone	2432-27-1	-	-	2.14±0.43	4.11±0.23	4.87±0.38	6.59±0.38
213	2-Methyl-hexadecane	1560-92-5	-	0.68±0.28	1.66±0.9	2.75±0.37	4.54±0.66	5.88±1.22
214	Dimethyl octanedioate	1732-09-8	-	0.44±0.03	2.52±0.28	4.53±0.25	5.41±0.14	5.77±0.3
215	(2R,3R,6S)-6-Isopropyl-3-methyl-2-(prop-1-en-2-yl)-3-vinylcyclohexanone	39020-72-9	-	0.2±0.08	1.51±0.45	3.91±0.31	4.94±0.33	5.76±0.34
216	2,6-Dihydroxy-Benzoic acid	303-07-1	-	0.16±0.04	2.28±1.19	3.44±0.39	4.76±1.08	5.62±0.94
217	Eugenol acetate	93-28-7	0.13±0.04	0.6±0.14	2.59±0.32	4.21±0.32	5.17±0.25	5.6±0.53
218	2,2'-Ethylidenebis(5-methylfuran)	3209-79-8	-	0.92±0.12	2.74±0.5	3.86±0.28	4.98±0.15	5.47±0.36
219	P-Anisic acid	100-09-4	-	0.21±0.03	2.39±0.97	4.19±0.19	4.82±0.17	5.38±0.38
220	Methyl vanillate	3943-74-6	-	0.63±0.19	2.56±0.89	4.34±0.14	4.96±0.49	5.26±0.49
221	6-Propyl-2,3,4,5-tetrahydropyridine	1604-01-9	0.84±0.26	1.38±0.07	3.01±0.59	3.39±0.52	4.29±1.86	5.25±1.34
222	(E)-6-Nonenal	2277-20-5	1.58±0.07	2.34±0.19	3.28±1.13	3.87±0.72	5.39±0.89	5.23±1.04
223	4,5,9,10-Dehydro-isolongifolene	156747-45-4	-	0.46±0.05	1.84±0.56	2.97±0.3	3.68±0.16	5.05±1.52
224	Farnesal	19317-11-4	0.24±0.12	0.35±0.03	1.61±0.51	3.27±0.35	4.66±0.57	4.92±0.16
225	Bornyl formate	7492-41-3	0.71±0.19	0.89±0.41	2.54±0.97	3.32±0.4	3.65±0.45	4.75±0.82
226	(E)-5-Isopropyl-8-methylnona-6,8-dien-2-one	54868-48-3	-	0.4±0.17	1.48±0.29	4.72±0.95	5.18±0.49	4.68±0.3
227	Epi-Eudesmol	15051-81-7	-	0.21±0.06	1.64±0.17	2.79±0.5	3.78±0.21	4.64±0.6
228	Eudesm-3-en-11-ol	473-16-5	-	-	1.42±1.41	1.62±0.33	3.61±0.64	4.59±0.68
229	(1R,1Ar,2As,5R,6R,6As,7As)-1,6,6A-Trimethyldecahydro-1,2A-methanocyclopropa[B]naphthalen-5-ol	860769-47-7	0.09±0.01	0.41±0.24	1.95±0.37	3.38±0.23	4.19±0.04	4.46±0.65
230	Guvacoline	495-19-2	-	-	1.86±0.62	3.75±0.55	3.96±0.49	4.41±0.51
231	1,2-Diethyl-3,4,5,6-tetramethyl-benzene	33884-69-4	-	-	0.83±0.55	1.99±0.33	3.05±0.67	4.34±0.71
232	1R,4R,7R,11R-1,3,4,7-Tetramethyltricyclo[5.3.1.0(4,11)]undec-2-ene	137235-59-7	0.3±0.06	0.63±0.08	1.6±0.52	2.58±0.16	2.93±0.32	4.2±0.93
233	Citronellal	106-23-0	1.01±0.04	1.88±0.14	2.76±0.42	3.29±0.34	4±0.18	4.17±0.46
234	4,8-Methanoazulen-9-Ol, decahydro-2,2,4,8-tetramethyl-, stereoisomer	4586-22-5	-	0.28±0.1	2.09±0.46	3.57±0.2	3.84±1.04	4.14±0.66
235	4-Methyl-5-nonanone	35900-26-6	0.68±0.16	1.04±0.13	1.55±0.22	3.56±0.73	4.66±0.29	3.94±0.36
236	1,1'-(1,3-Propanediyl)bis-benzene	1081-75-0	0.3±0.03	0.46±0.05	1.67±0.47	3.13±0.3	4.43±0.61	3.94±0.33
237	cis-2-Benzofurancarboxylic acid, 2,4,5,6,7,7A-hexahydro-4,4,7A-trimethyl-, methyl ester	77383-92-7	-	0.25±0.04	0.93±0.28	1.73±0.17	2.43±0.7	3.66±0.65
238	4-Sec-Butyl-2-tert-butylphenol	52184-13-1	-	-	1.39±0.46	2.55±0.06	2.95±0.18	3.48±0.42
239	2-Benzylideneheptanal	122-40-7	0.07±0.03	0.11±0.06	1.17±0.43	1.93±0.54	3.24±0.31	3.37±0.77
240	2-Ethyl-1-benzothiophene	1196-81-2	0.16±0.05	0.64±0.09	1.31±0.15	2.26±0.36	2.76±0.04	3.3±0.38
241	6-Amino-2-methylquinoline	65079-19-8	-	-	1.95±1.33	2.08±0.51	3.52±0.11	3.25±0.38
242	4-(2,6,6-Trimethyl-cyclohex-1-enyl)-butan-2-ol	3293-47-8	-	-	1.44±0.62	1.83±0.09	2.54±0.25	3.16±0.41
243	Trans-4-Methoxycinnamaldehyde	24680-50-0	-	-	1.42±0.46	2.23±0.45	3.18±0.52	3.09±0.44
244	9-Methyl-1-undecene	74630-41-4	0.89±0.07	1.51±0.21	2±0.56	2.65±0.35	3.29±0.23	3.09±0.17
245	4-Methyl-2-nitrophenyl acetate	54646-55-8	-	-	0.98±0.25	1.66±0.25	2.6±0.44	2.63±0.46
246	Bergamotenol	88034-74-6	-	0.13±0.04	1.33±0.65	1.84±0.21	2.73±0.12	2.49±0.79
247	3-Methylheptyl acetate	72218-58-7	0.43±0.05	0.9±0.15	1±0.21	2.09±0.3	2.79±0.13	2.32±0.19
248	6-Methyl-6-(5-methylfuran-2-yl)heptan-2-one	50464-95-4	-	0.17±0.08	0.51±0.13	1.38±0.12	1.82±0.35	2.19±0.09
249	1,5-Dichloro-6,7-dimethyl-2,4-dioxabicyclo[3.2.0]hept-6-en-3-one	35436-20-5	-	-	1.09±0.43	1.28±0.09	1.68±0.21	1.97±0.34
250	Hexyl 2-furoate	39251-86-0	-	0.12±0.06	0.83±0.07	1.38±0.13	1.8±0.09	1.94±0.08
251	Isobornyl formate	1200-67-5	-	0.36±0.09	0.84±0.31	1.33±0.09	1.25±0.2	1.82±0.39
252	(1R,3As,8As)-1,4,4,6-Tetramethyl-1,2,3,3A,4,5,7,8-octahydrocyclopenta[C]pentalene	871660-96-7	-	0.09±0.02	0.4±0.1	1.01±0.13	1.22±0.08	1.81±0.31
253	Isobutyl adipate	141-04-8	-	-	0.74±0.39	0.97±0.3	1.55±0.1	1.8±0.55
254	Acetic acid	103-09-3	0.36±0.18	0.7±0.04	0.84±0.18	1.83±0.43	2.07±0.08	1.57±0.25
255	2,5-Di(butan-2-yl)phenol	54932-77-3	-	-	0.65±0.11	1.23±0.1	1.36±0.1	1.54±0.06
256	1,1,7,7A-Tetramethyl-1A,2,6,7,7A,7B-hexahydro-1H-cyclopropa[A]naphthalene	154098-14-3	-	-	0.74±0.1	1.21±0.15	1.13±0.13	1.42±0.13
257	Trans-isoeugenol	5932-68-3	-	0.09±0.02	0.56±0.43	0.54±0.27	0.85±0.36	1.37±0.31
258	4-Methyl-2-phenyl-2-pentenal	26643-91-4	0.07±0.01	0.15±0.02	0.65±0.27	0.95±0.12	1.07±0.07	1.22±0.19
259	2-Hydroxymethylbenzimidazole	22128-99-0	-	-	0.38±0.11	0.83±0.14	0.99±0.09	0.97±0.02
260	(2E,4Z)-2,4-Decadienal	25152-83-4	0.16±0.11	0.23±0.08	0.59±0.13	0.75±0.28	1.1±0.15	0.92±0.26
261	2,3,6-Trimethyl-decane	62238-12-4	0.16±0.03	0.28±0.05	0.33±0.1	0.65±0.1	0.88±0.12	0.69±0.12
262	3-Hydroxycinnamic acid	588-30-7	-	-	0.17±0.03	0.33±0.1	0.52±0.37	0.61±0.07
263	Coumarin	91-64-5	-	-	0.21±0.01	0.42±0.11	0.55±0.08	0.6±0.14

## Sheet: Table S6
Table S6. The content of differential VOCs in subclass 5
No.	Volatile compounds	CAS	Content (ug/kg)
			BT	R1	R2	R3	R4	T1
1	Dimethyl methylsuccinate	1604-11-1	23.69±2.06	37.47±3.98	49.91±11.64	60.42±3.46	62.86±5.57	107.48±10.55
2	(Z)-Furanoid linalool oxide	5989-33-3	23.74±2.48	37.52±4.26	49.14±11.11	59.55±3.22	62.58±5.53	106.51±10.25
3	Isobutylpyrazine	29460-92-2	20.36±2.71	34.99±2.52	48.16±11.16	57.12±2.5	59.8±5.33	100.92±9.7
4	4-Thujanol	17699-16-0	14.53±2.18	23±2.47	30.81±7.02	37.13±1.57	40.1±4.83	69.22±5
5	5-Dimethyl-2-furanmethanol, 5-ethenyltetrahydro-α	104188-13-8	13.6±1.11	20.96±2.5	29.44±6.82	35.92±1.42	37.48±3.65	65.59±5.99
6	6-Tetramethyl-cyclopenta[C]pentalen-3(3Ah)-one, octahydro-1,2,3A	120052-69-9	-	-	7.01±4.1	14.03±1.12	27.2±8.07	49.56±10.87
7	1-Phenylethanol	98-85-1	5.86±0.6	12.77±1.26	14.41±1.99	15.62±0.33	15.54±1.24	23.89±0.61
8	1,1-Dimethyl-3-methylene-2-ethenylcyclohexane	95452-08-7	5.19±0.66	9.6±1.07	12.18±2.09	13.45±0.25	13.99±0.44	19.99±1.52
9	3,5-Octadien-2-one	30086-02-3	4.73±0.71	15.11±1.52	13.38±2.97	12.94±0.44	13.72±1.54	19.59±1.78
10	2-Methyl-naphthalene	91-57-6	6.52±1.48	8.22±0.96	7.02±1.03	7.23±0.49	7.76±0.41	14.49±1.1
11	Orcinol	504-15-4	-	-	2.38±2.48	2.28±0.33	5.62±4.03	12.83±9.08
12	3-Methyl-benzaldehyde	620-23-5	1.94±0.25	3.52±0.53	3.92±0.88	4.64±0.27	4.55±0.1	8.78±1.13
13	5-Ethyl-2-methylpyrazine	13360-64-0	-	4.42±0.48	4.58±2.09	2.92±0.02	4.26±1.78	8.31±5.39
14	1-Methyl-naphthalene	90-12-0	4.83±0.83	4.14±0.28	3.46±0.42	3.34±0.2	3.15±0.05	7.61±0.6
15	Carotol	465-28-1	-	-	0.77±0.2	1.45±0.25	3.01±0.88	7.2±0.67
16	1-Ethylidene-1H-indene	2471-83-2	2.92±0.63	3.36±0.45	2.82±0.47	2.82±0.29	2.81±0.25	6.66±0.36
17	3-Ethyl-2,5-dimethylpyrazine	13360-65-1	1.23±0.12	3.04±0.25	2.69±1.16	2.17±0.1	2.85±0.81	4.32±2.04
18	1,6-Dimethyl-naphthalene	575-43-9	-	0.91±0.26	1.04±0.27	1.02±0.18	1.03±0.09	3.64±0.16
19	6-Methyl-5-nonene4-one	7036-98-8	0.16±0.08	0.11±0.04	1.11±0.9	0.97±0.24	1.78±1.08	3.33±1.38
20	3-Isopentyl-2,5-dimethylpyrazine	18433-98-2	1.06±0.22	0.9±0.1	1.5±0.88	0.83±0.13	1.36±0.08	1.66±0.54
21	Sabinen	3387-41-5	0.36±0.05	0.42±0.14	0.6±0.05	0.53±0.09	1.04±0.13	1.64±0.47
22	3-Acetyl-2,5-dimethylbenzo(B)thiophene	6179-04-0	-	-	-	-	-	1.3±0.15
23	Khusimyl methyl ether	300349-20-6	-	-	-	0.55±0.02	0.52±0.16	1.31±0.1
24	β-Phenylethyl butyrate	103-52-6	-	0.19±0.06	-	0.46±0.11	0.64±0.17	1.12±0.48
25	Trans-4-(Isopropyl)-1-methylcyclohex-2-en-1-ol	29803-81-4	0.39±0.03	0.38±0.1	0.51±0.21	0.62±0.15	0.65±0.15	0.88±0.09
